# Supplementary material
Source: PubMed Central journal article supplement (PMC4403737)
Supplement: NIHMS581490-supplement-2.pdf [file NIHMS581490-supplement-2.pdf]

# ETASSATEPAEPEP

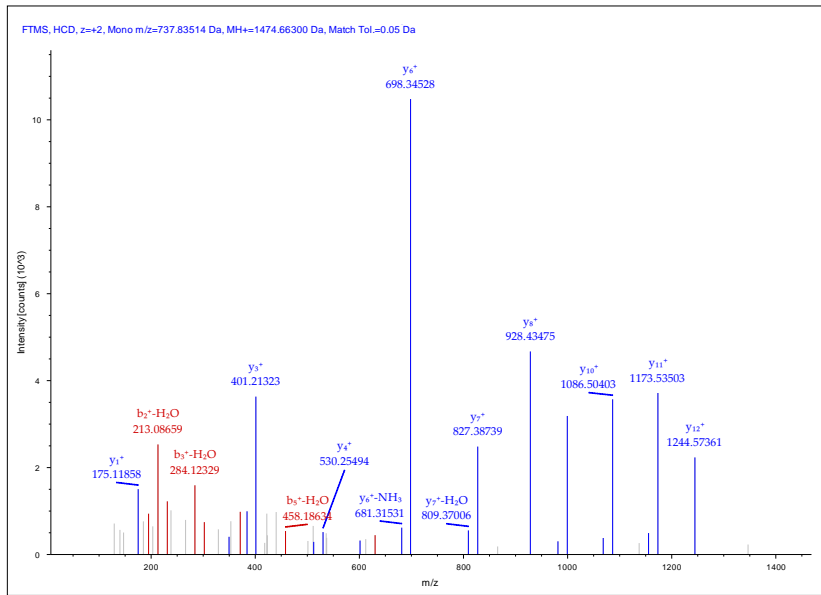

Experiment

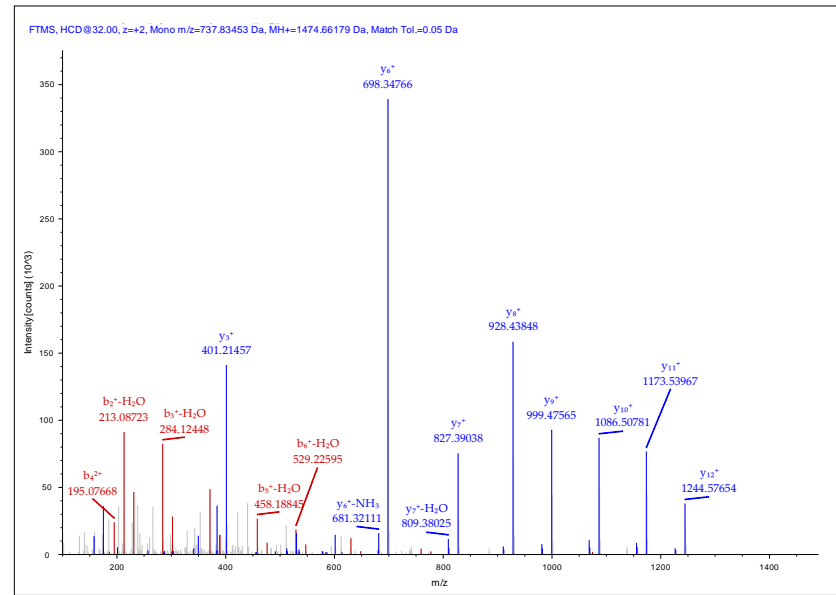

Validated

# VPGPMGPNSGPSSR

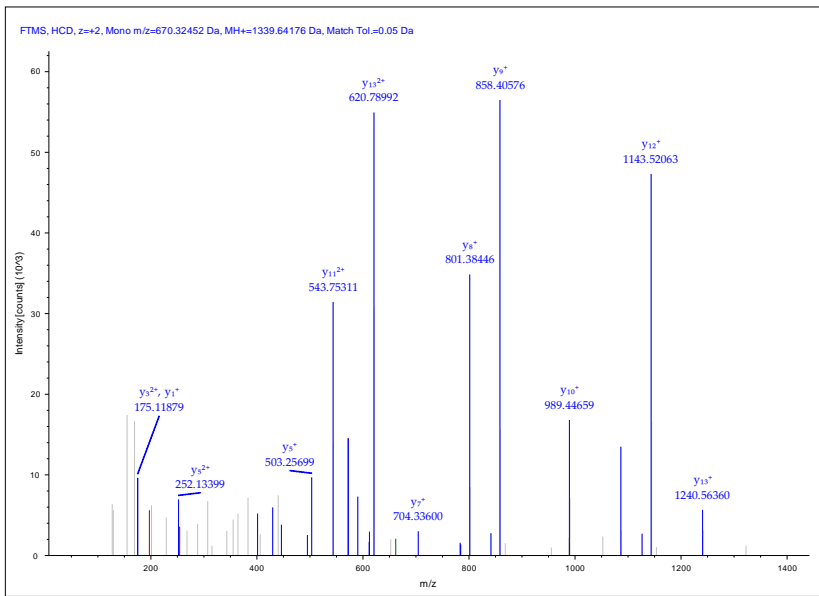

Experiment

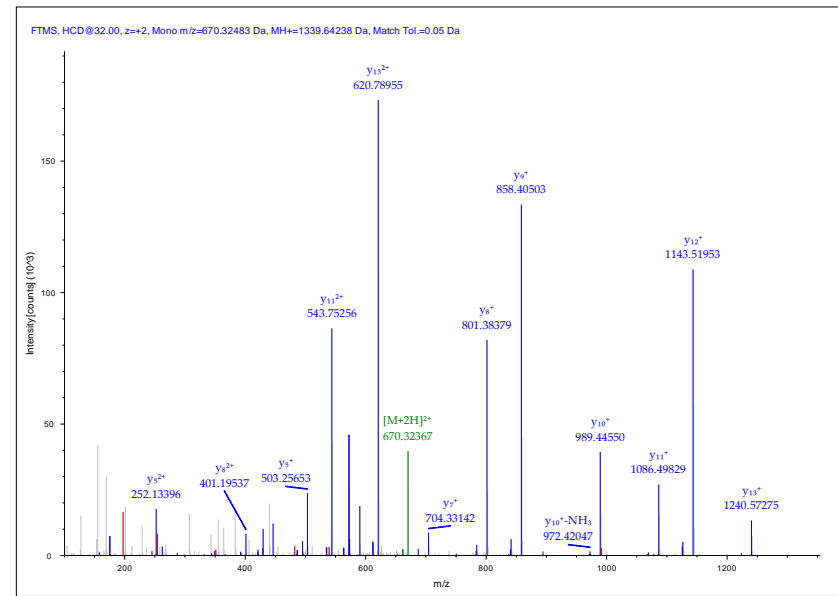

Validated

# TGALPGGPLSNPR

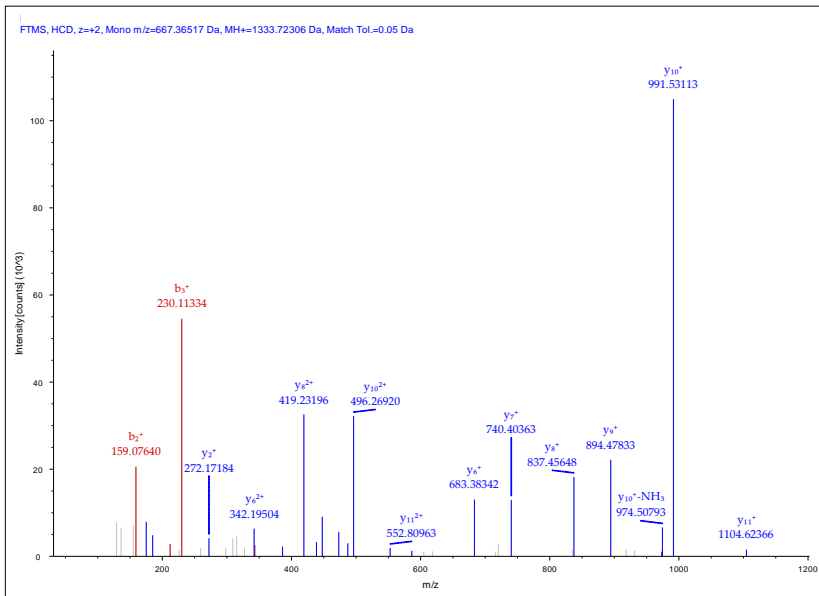

Experiment

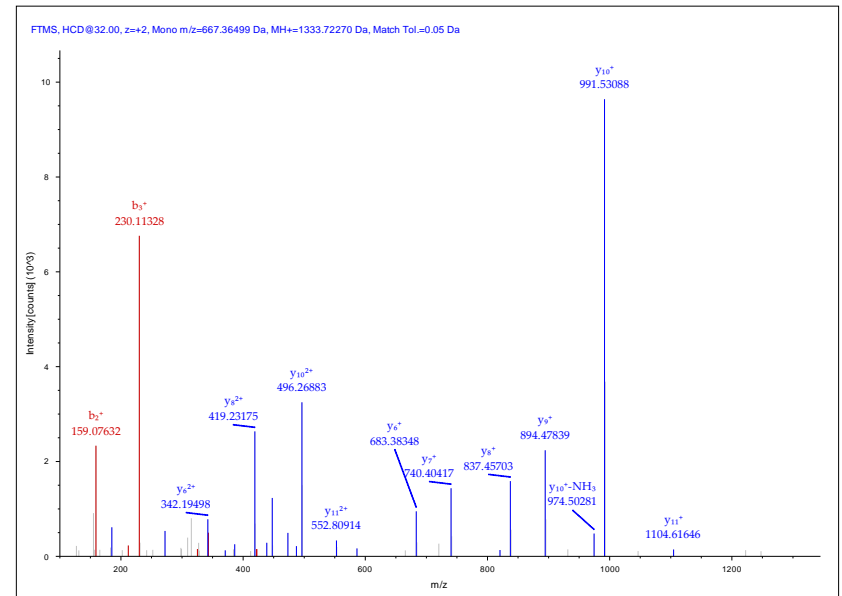

Validated

# GGGPMGPGSGPNLR

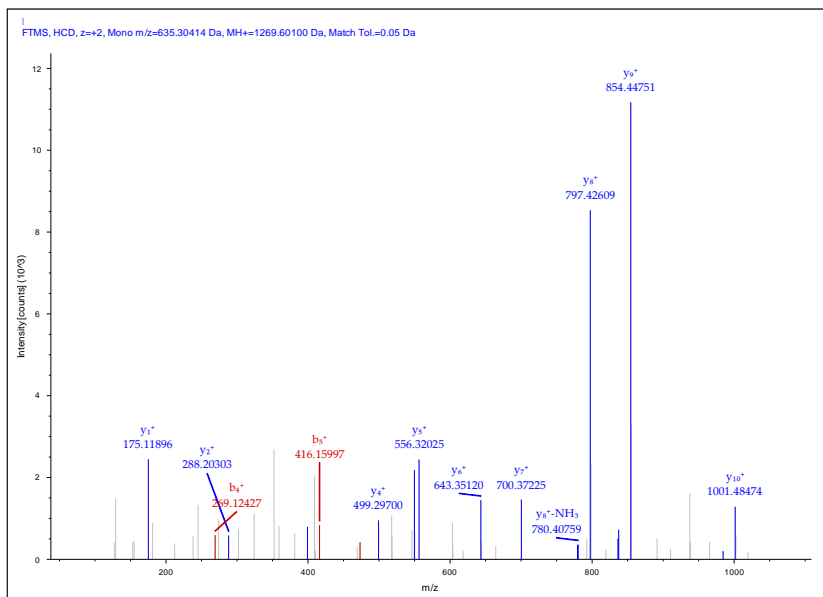

Experiment

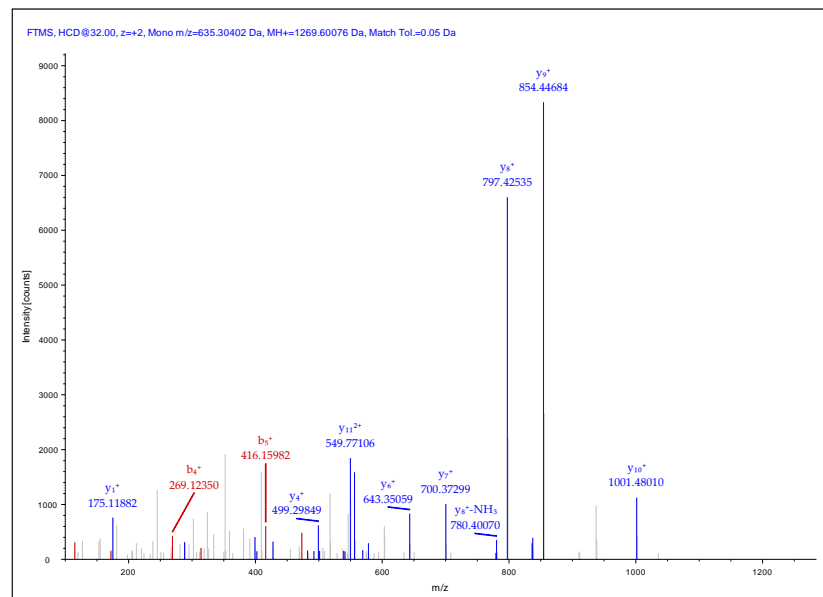

Validated

# VYGVAPHCLDEGTVR

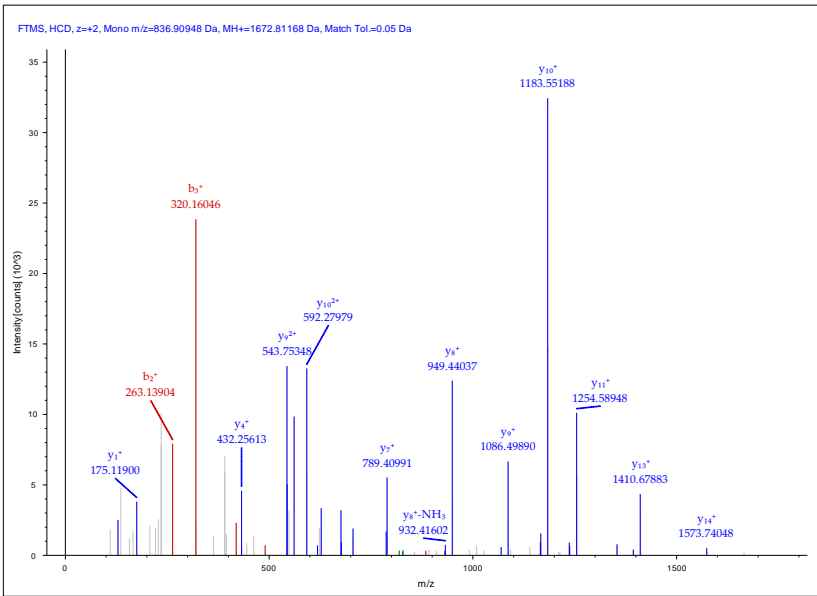

Experiment

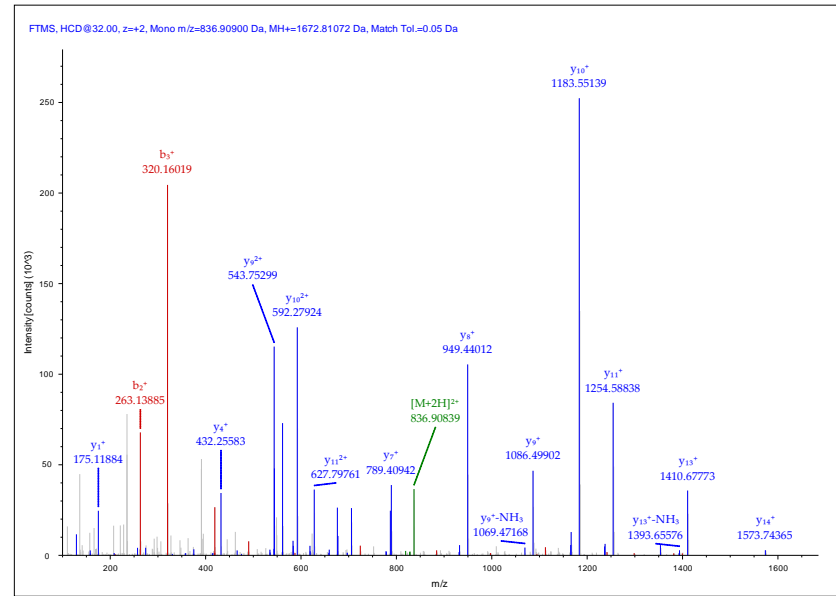

Validated

# YTDRDFYFASIR

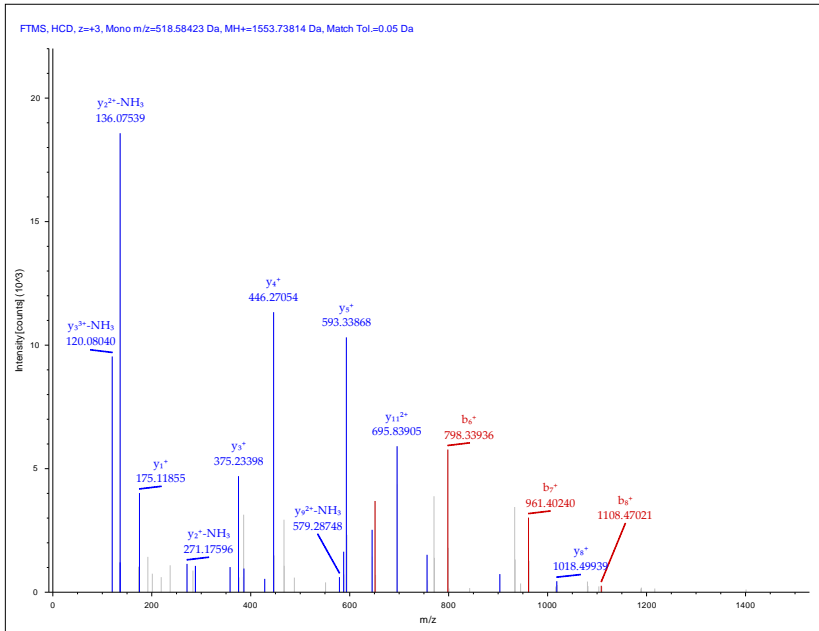

Experiment

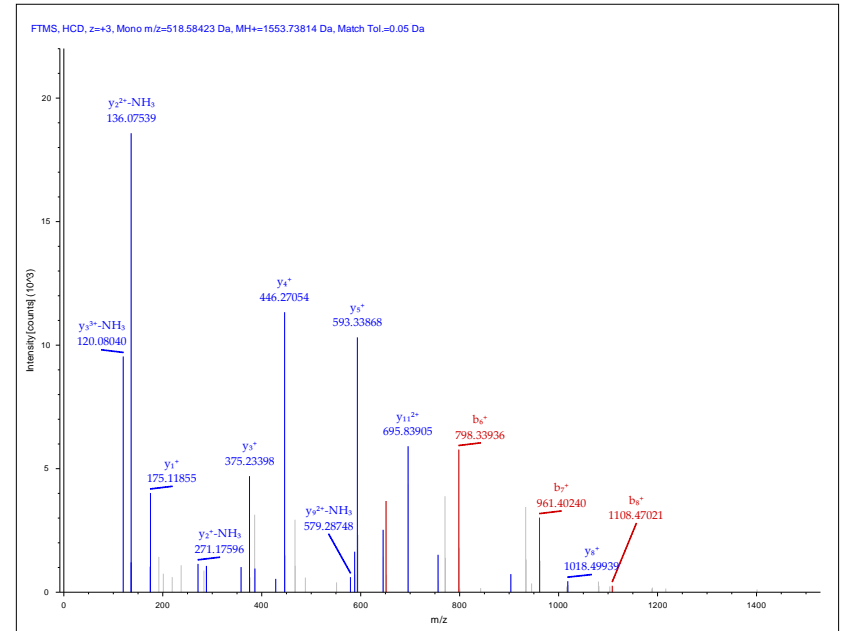

Validated

# NQAAPAQKPPGR

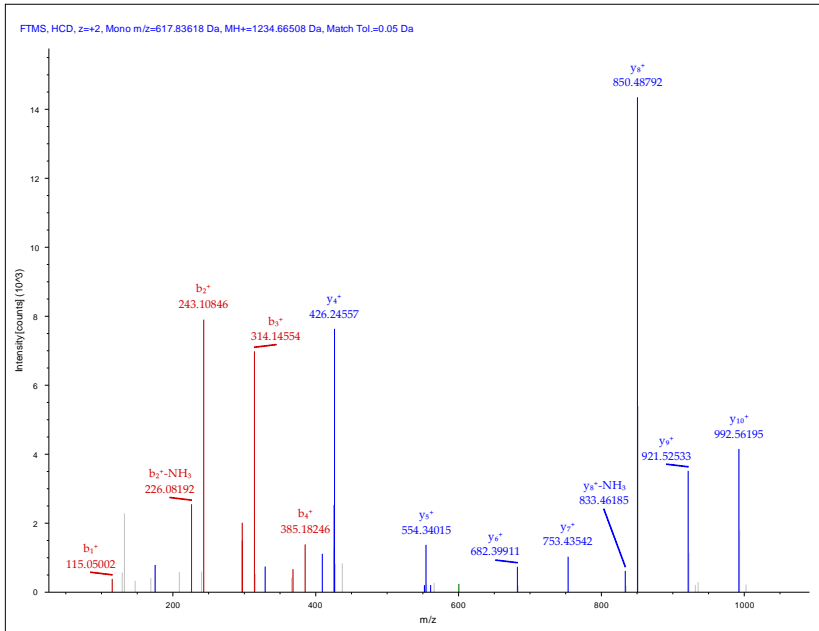

Experiment

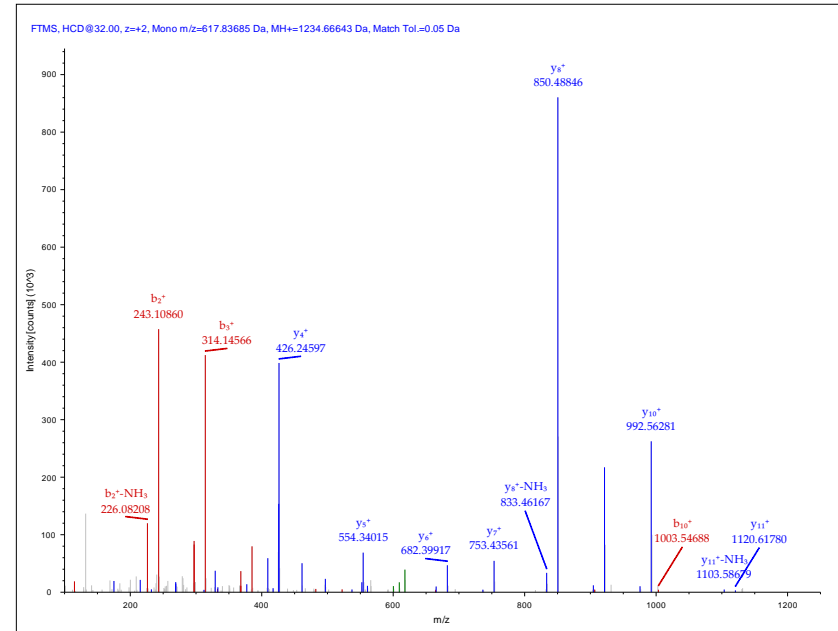

Validated

# SQEEEEEEKAAVGLSNR

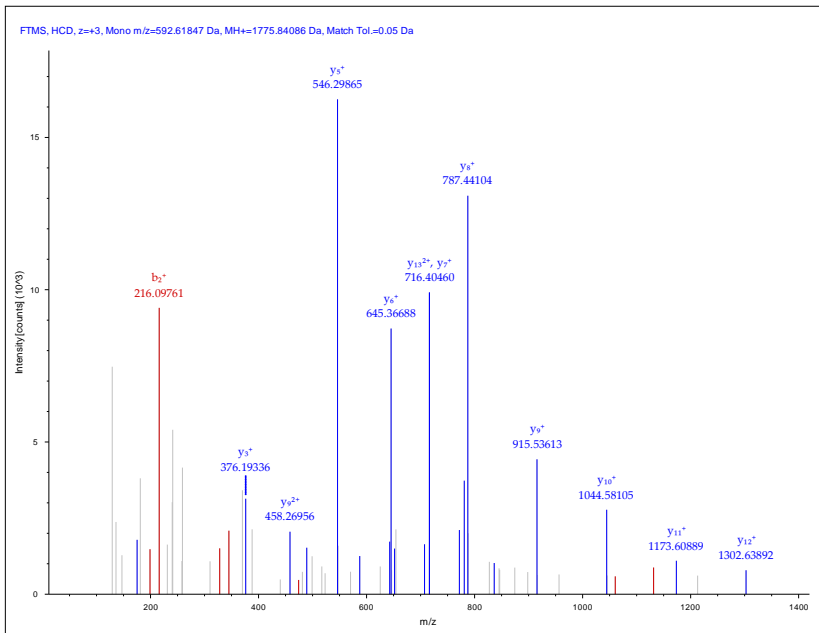

Experiment

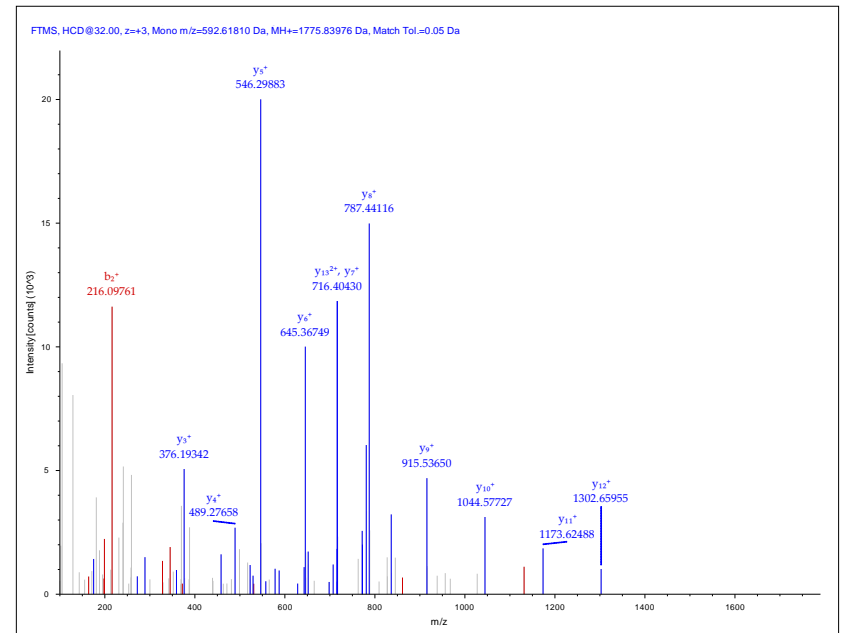

Validated



# WGSDFSPASTVSAPVSR

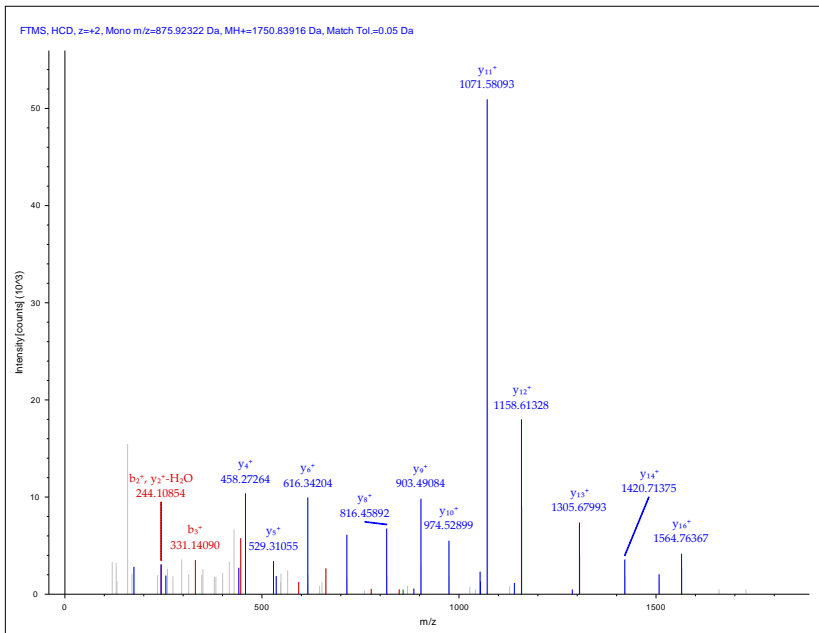

Experiment

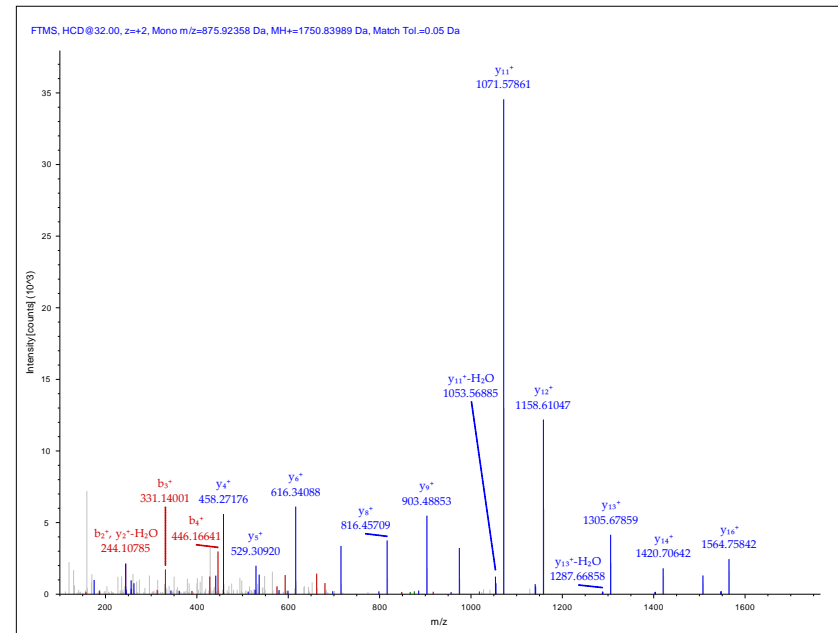

Validated

# YFSVEGQLEFR

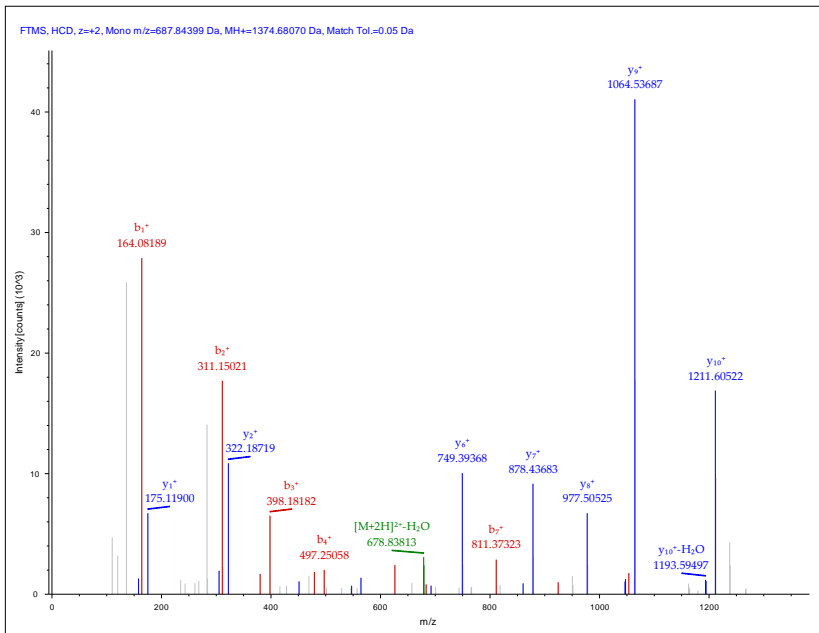

Experiment

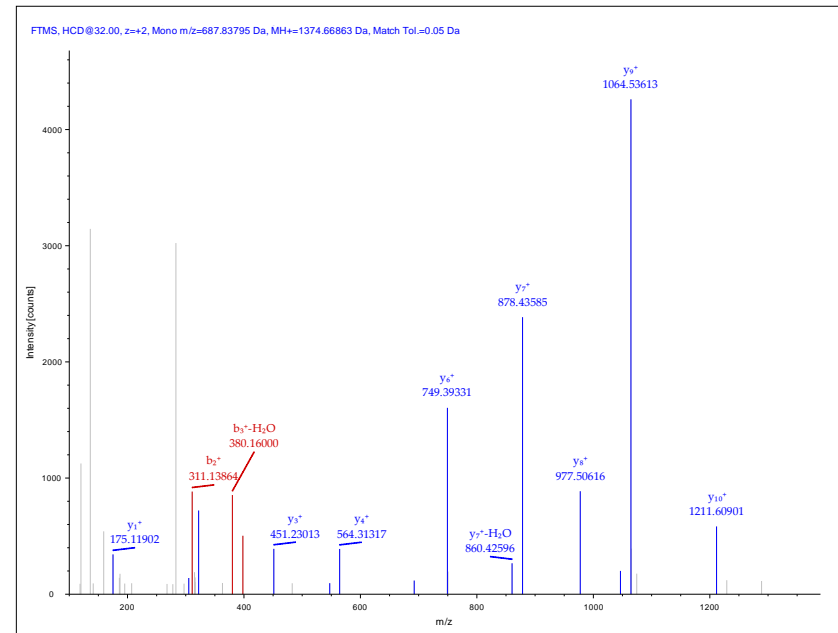

Validated

# AELSNETDTSFAER

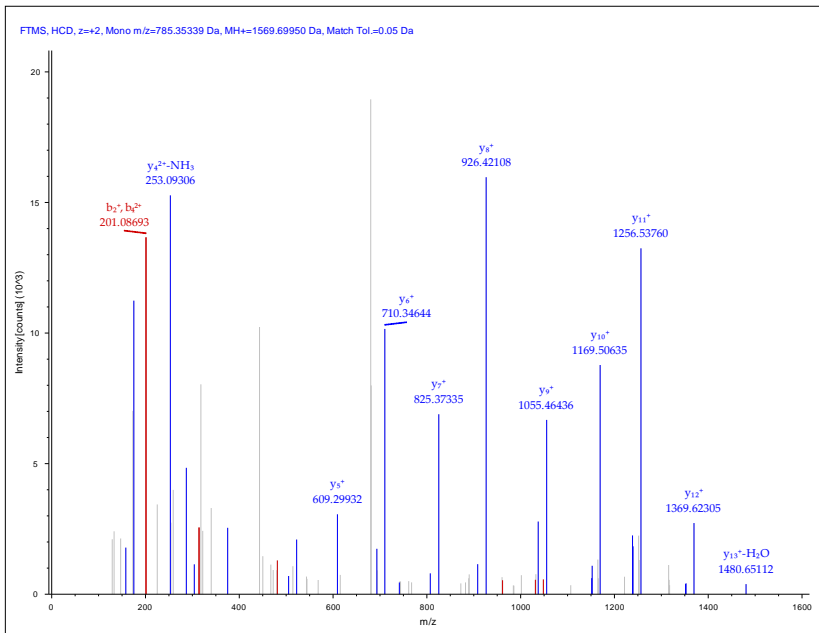

Experiment

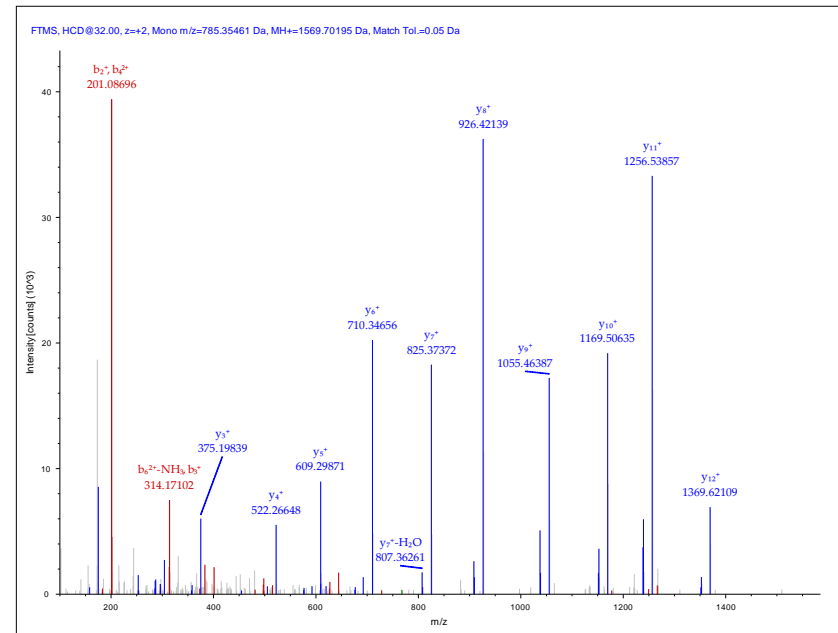

Validated

# DQVGFVVSPATGGER

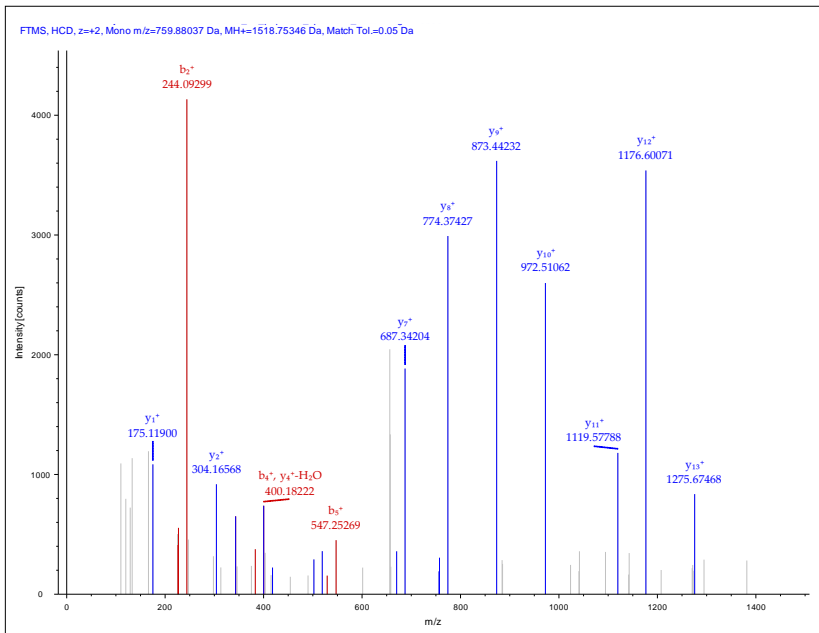

Experiment

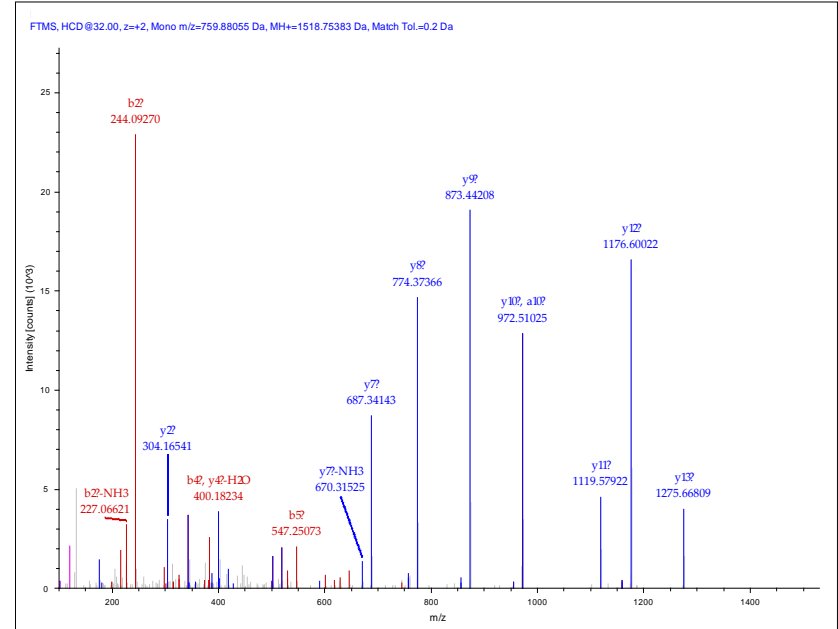

Validated

# EAEAGGGGGACAVGLGR

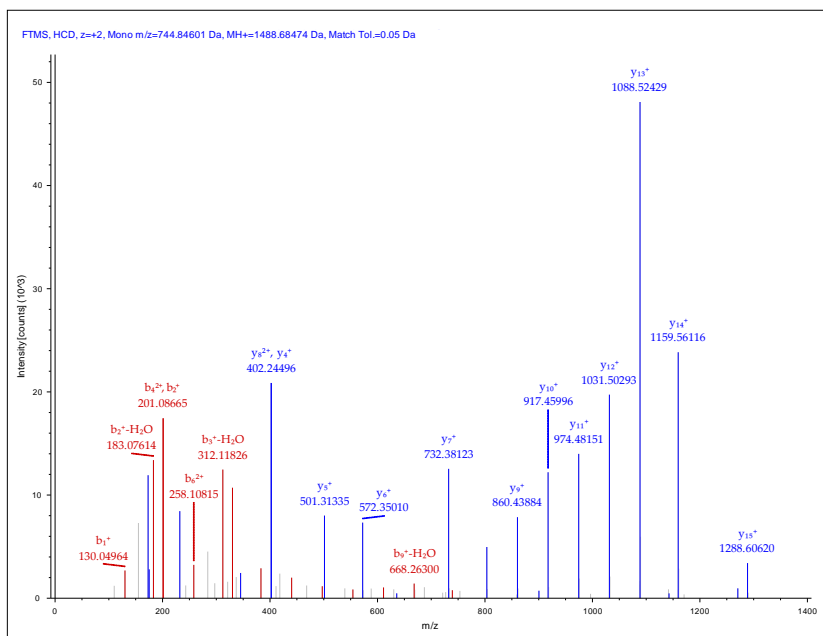

Experiment

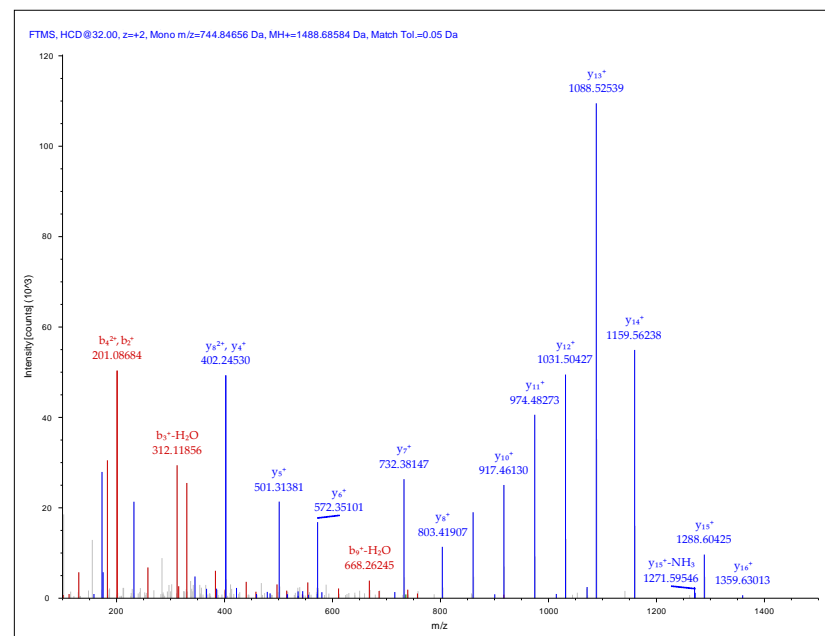

Validated

# EQEPGPGTTPPQPVR

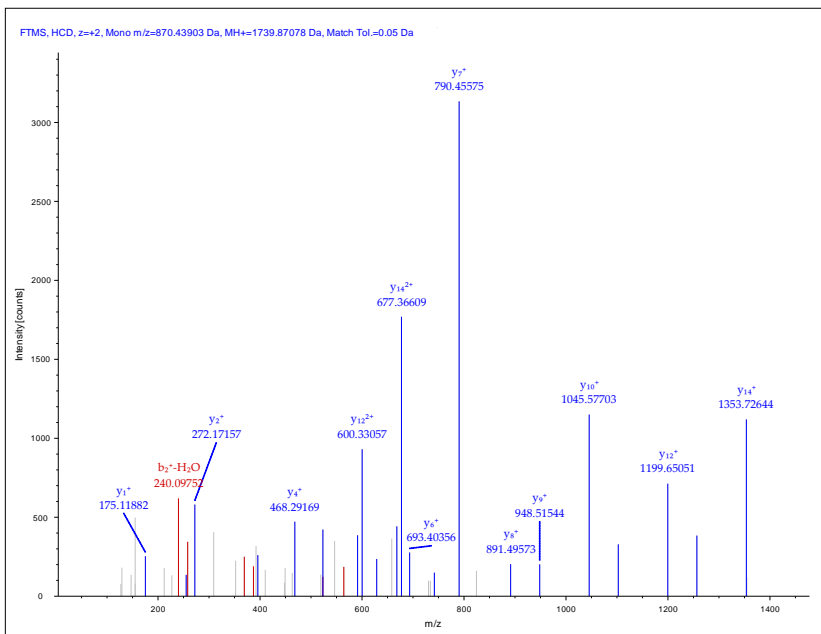

Experiment

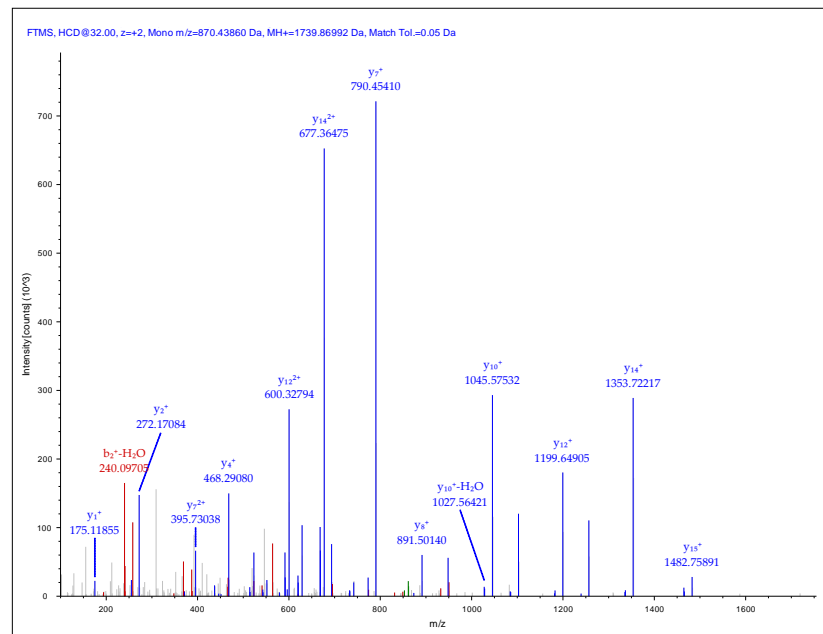

Validated

# FTLLQGAESIVTYR

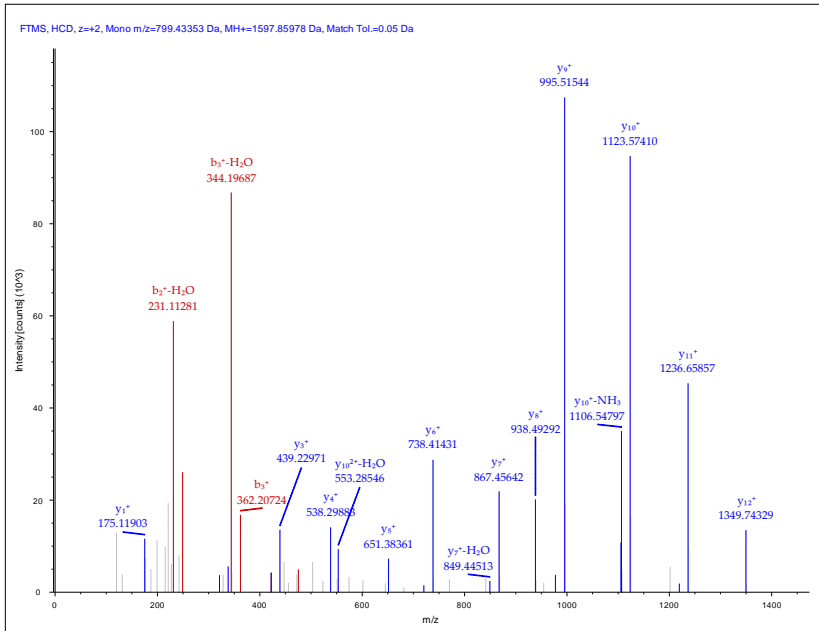

Experiment

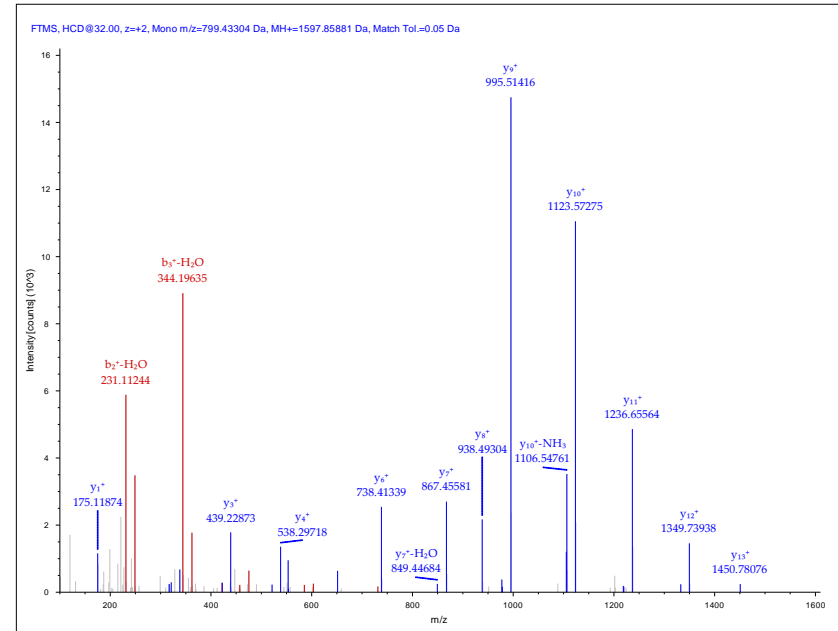

Validated

# GCEEDVATQQPVSR

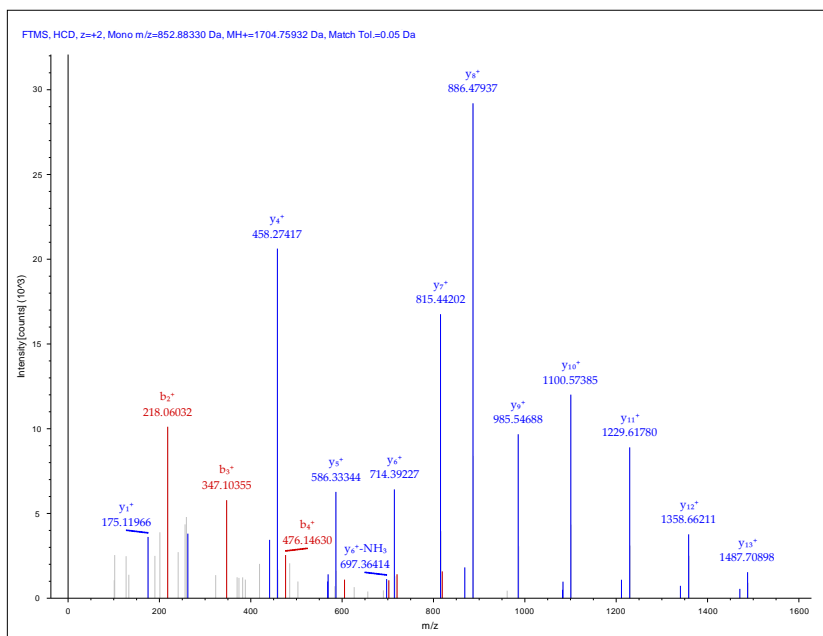

Experiment

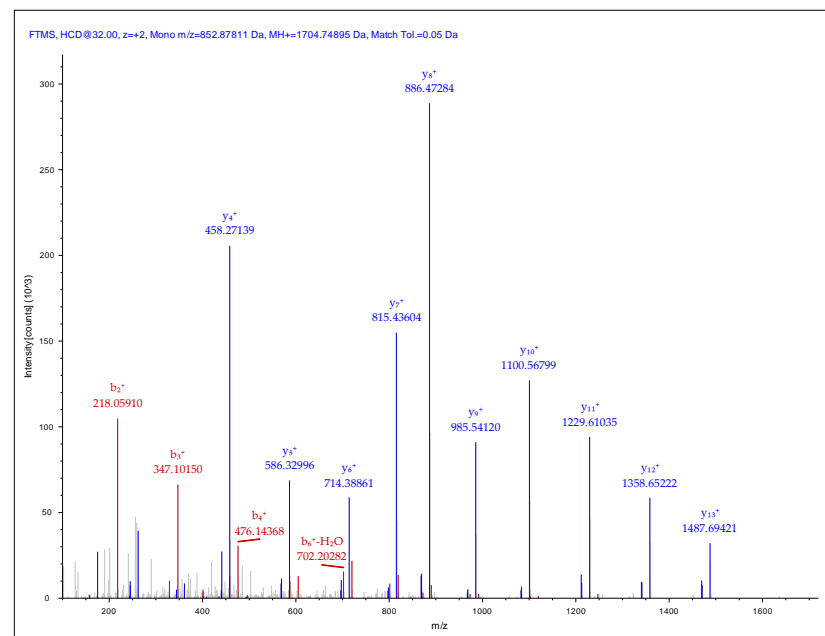

Validated



# GCTAQPGPAFPHR

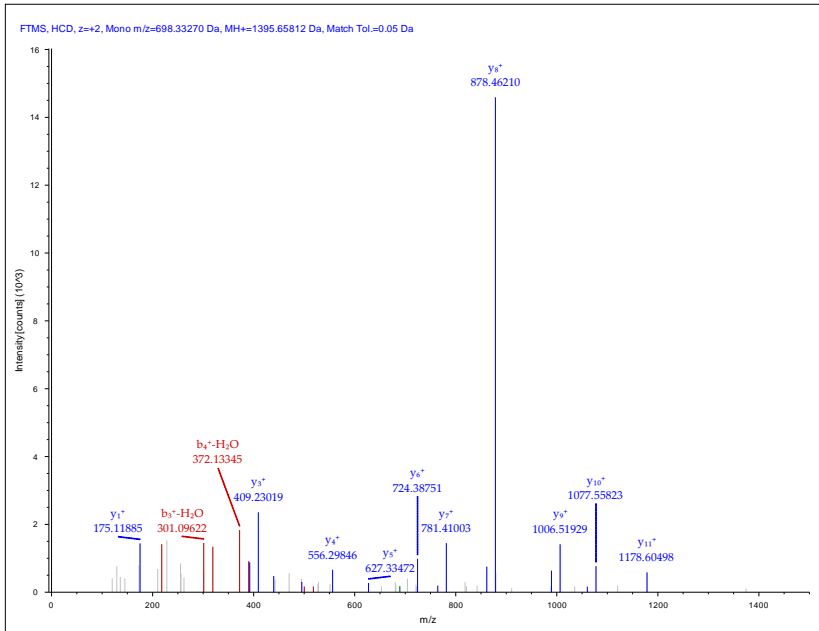

Experiment

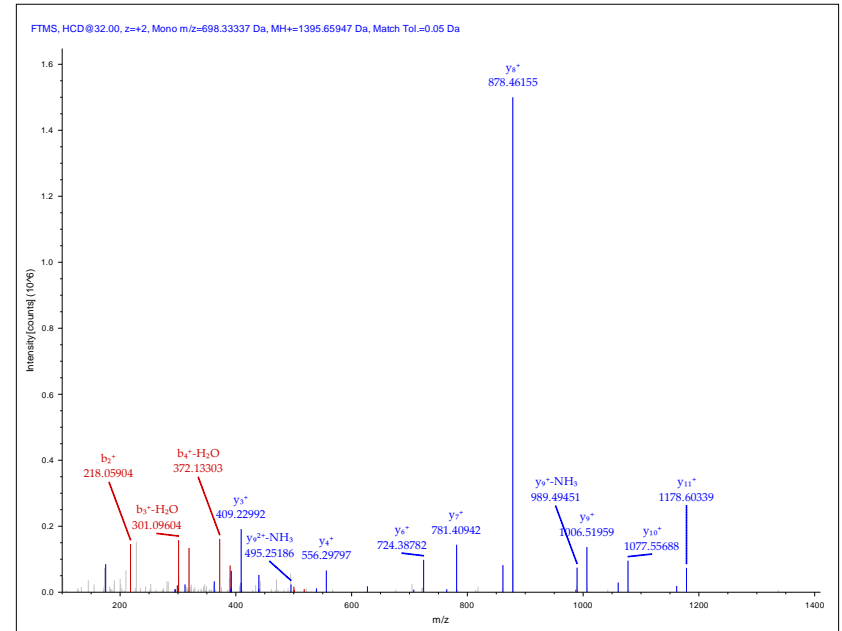

Validated

# NFAFVQYVNER

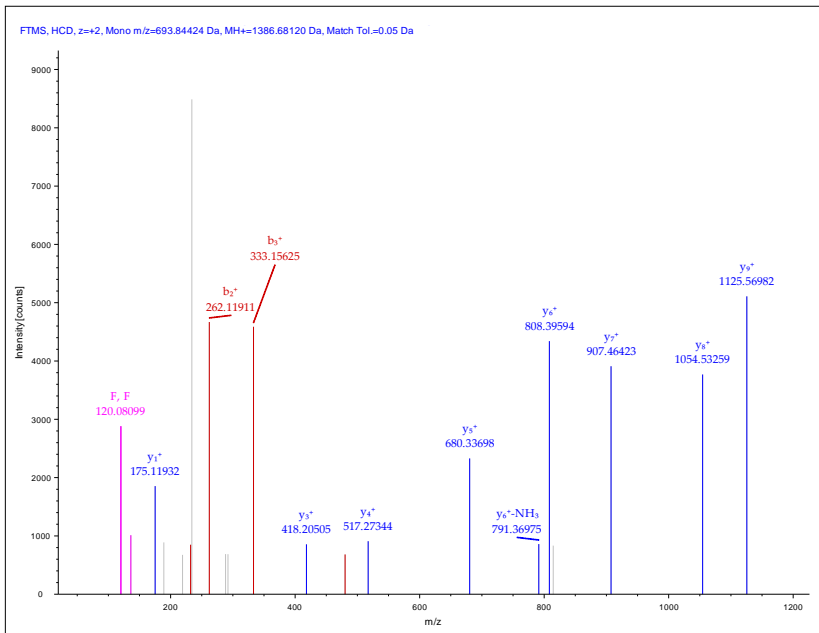

Experiment

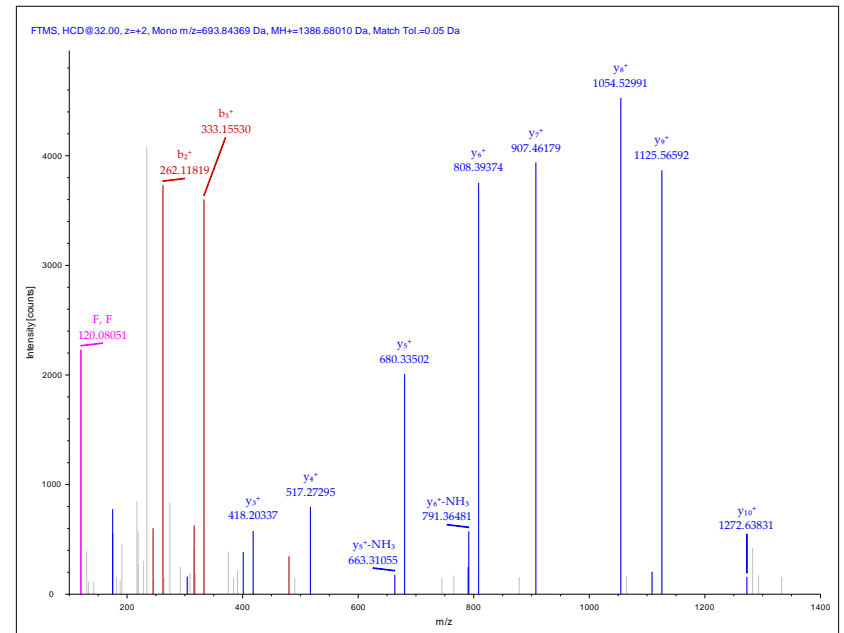

Validated

# LLGDGSLESWQR

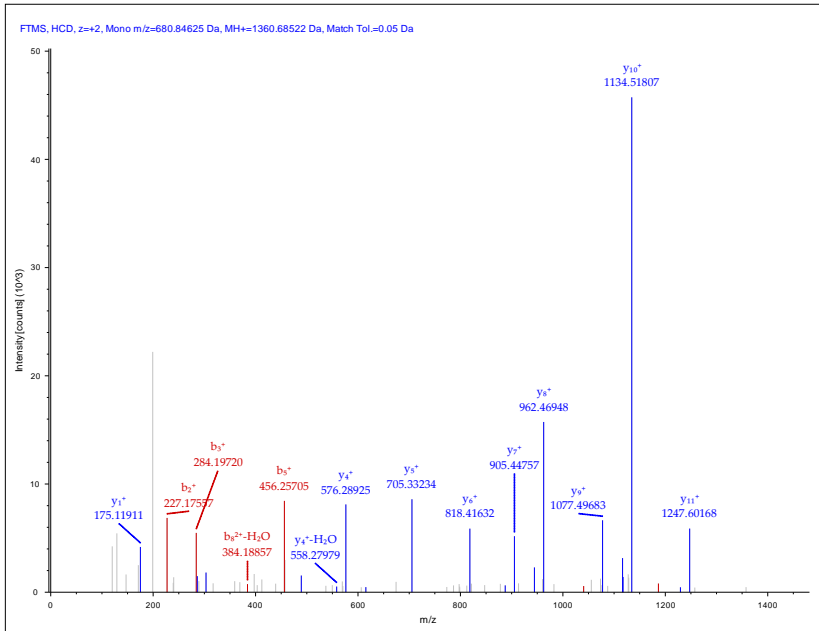

Experiment

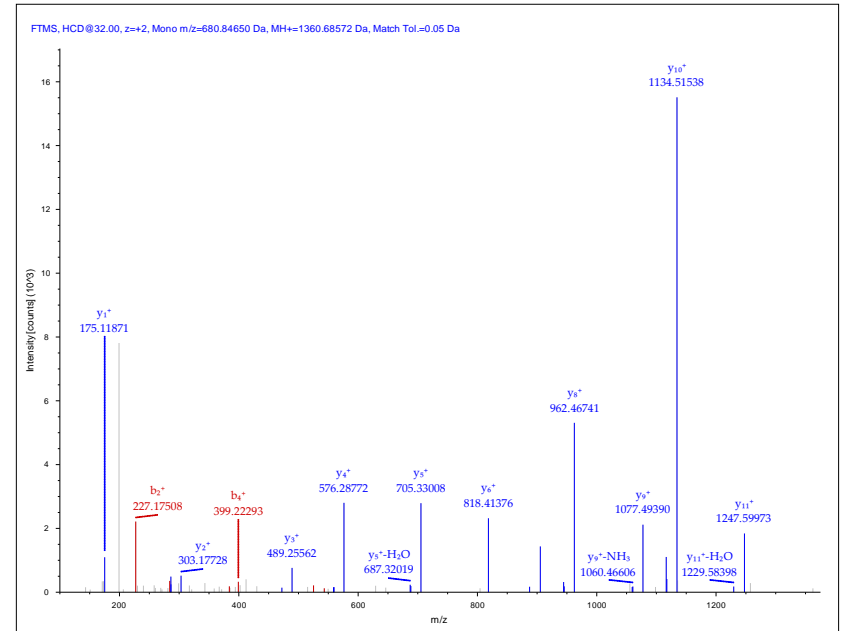

Validated

# YHTVNGHNCEIR

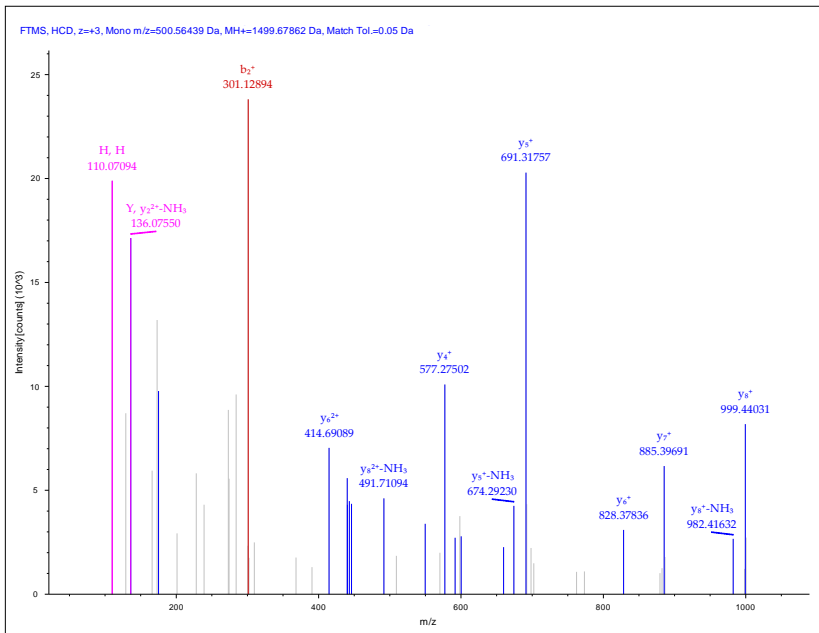

Experiment

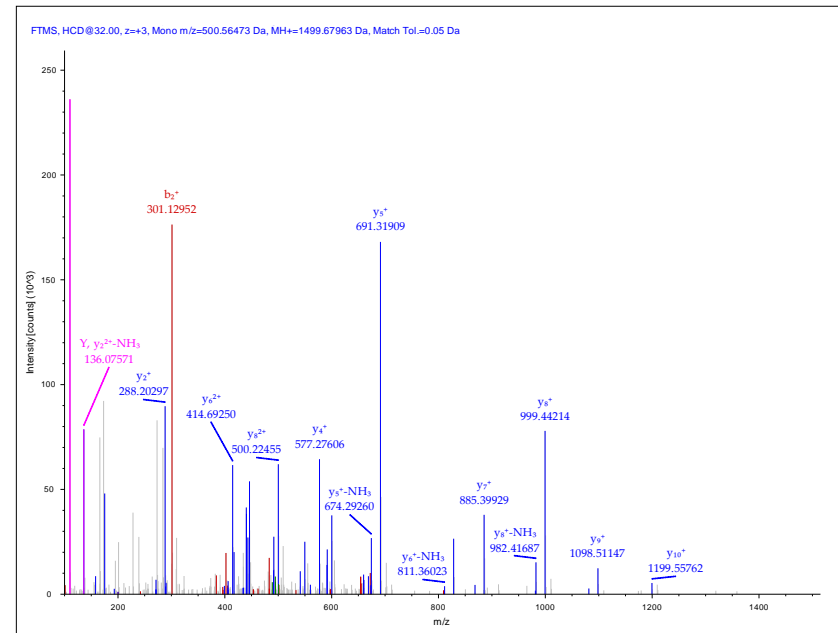

Validated

# VYQYEVGDDLSGR

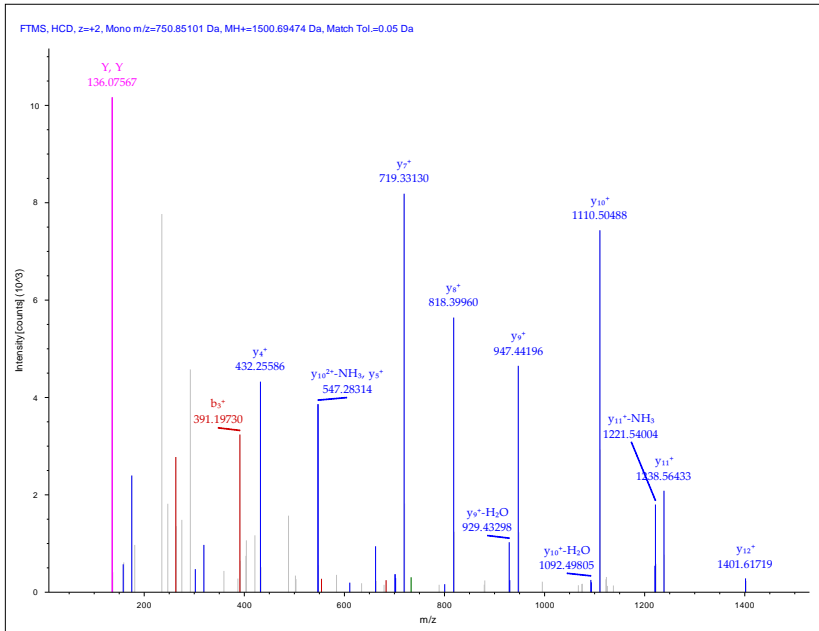

Experiment

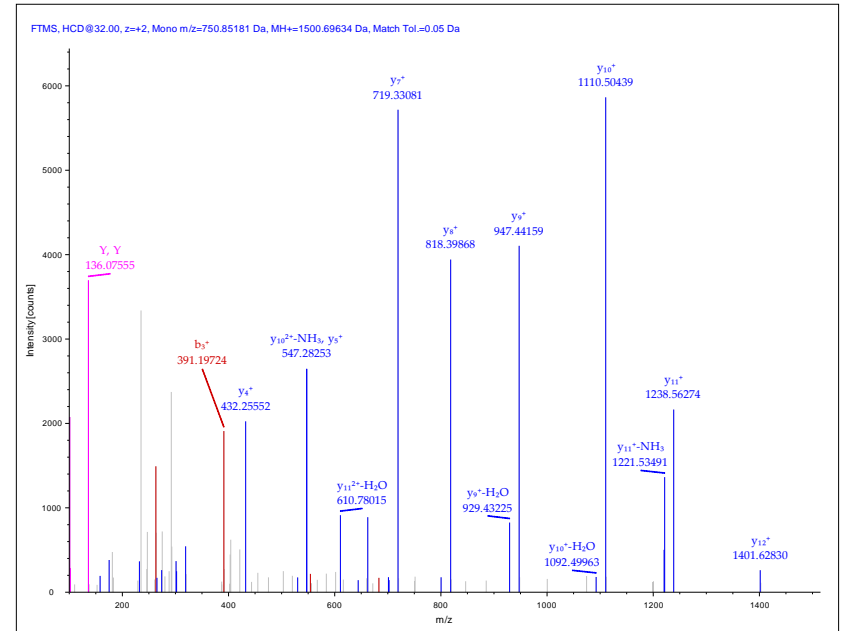

Validated

# VDNDENEHKLRL

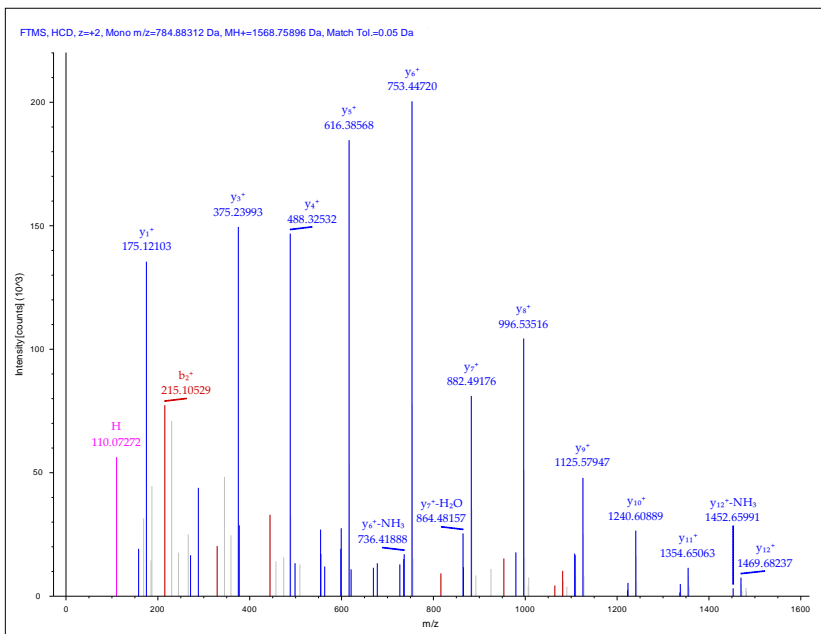

Experiment

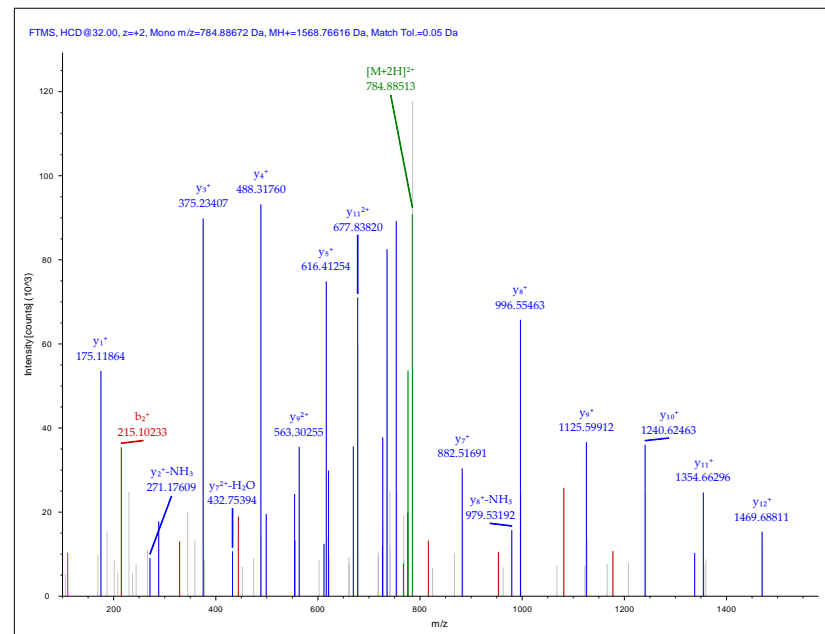

Validated

# QPQPAQNVLAAPR

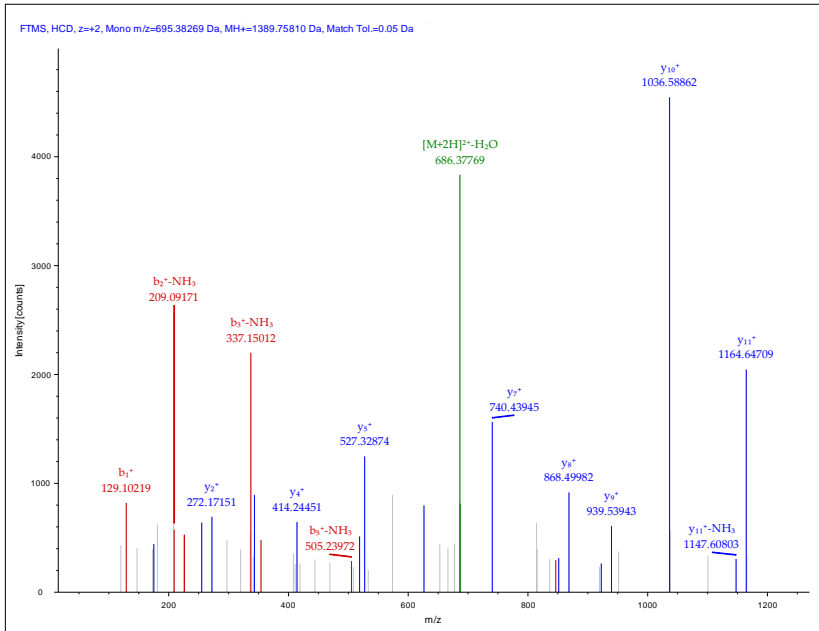

Experiment

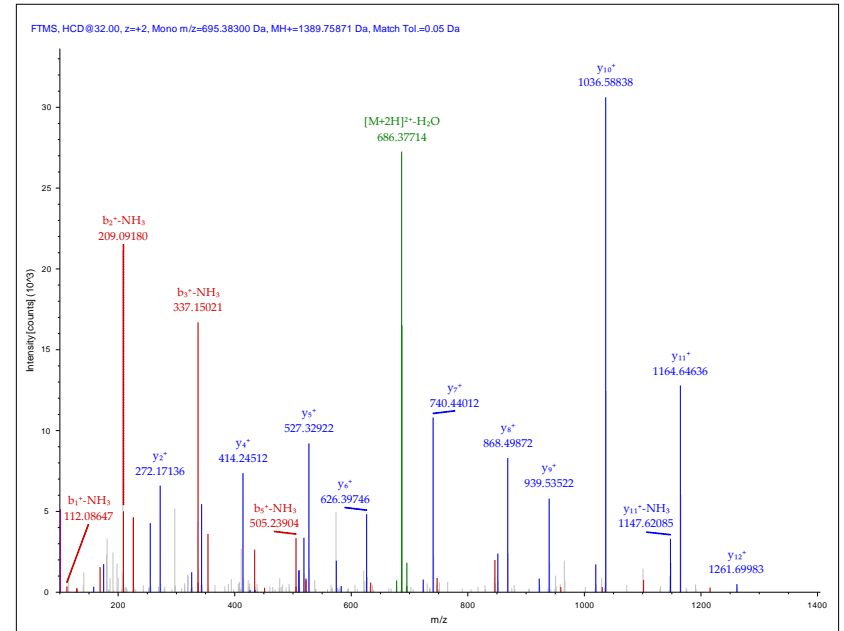

Validated

# LGGLPGPGMSNPR

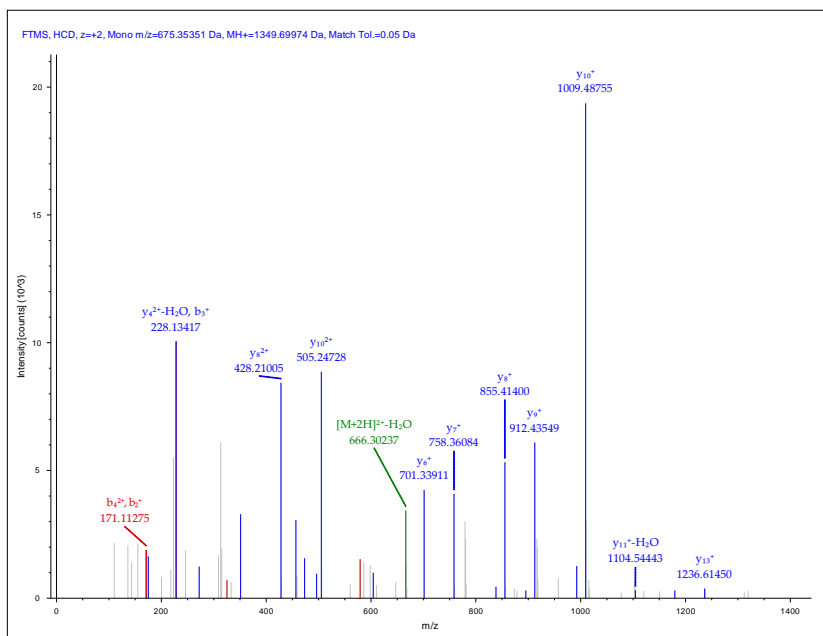

Experiment

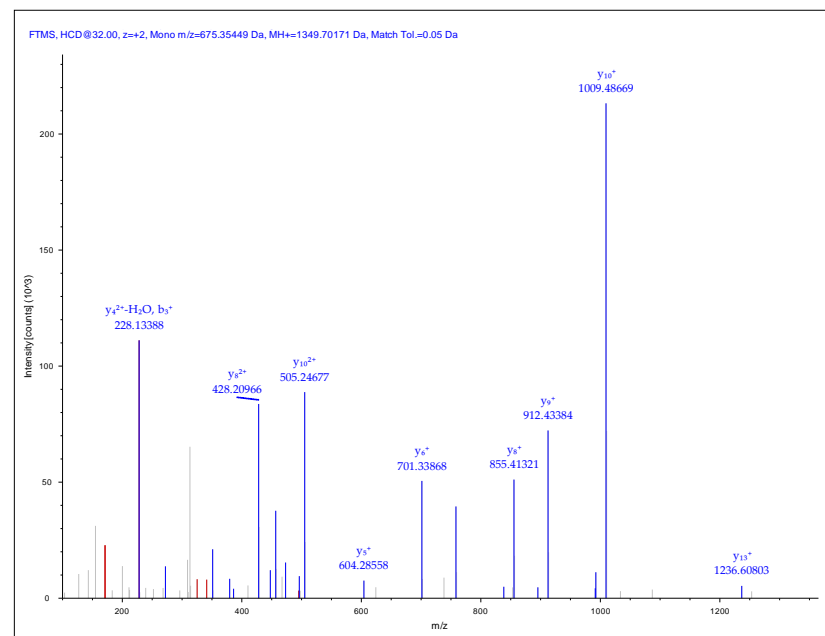

Validated



# H LDAHTAAHSQSPR

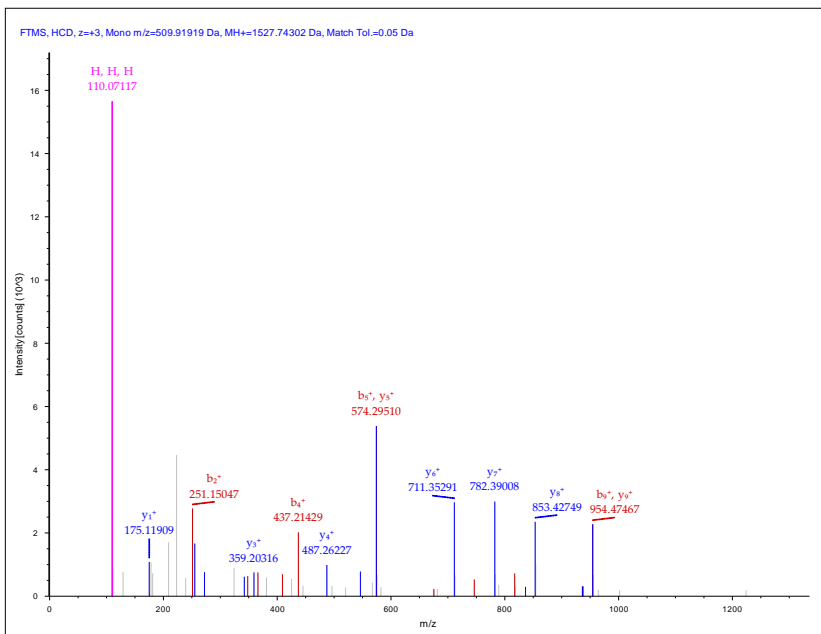

Experiment

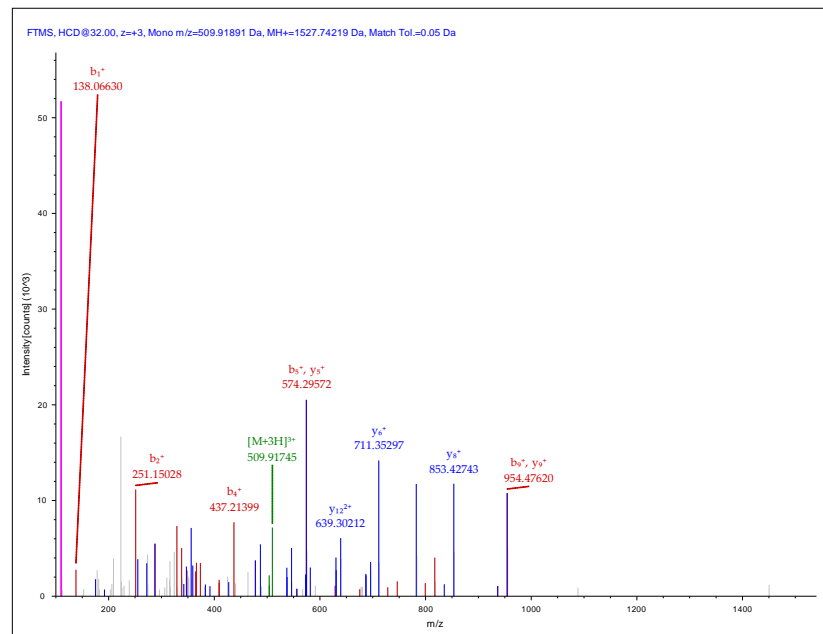

Validated

# LEVASSPPVSEAVPR

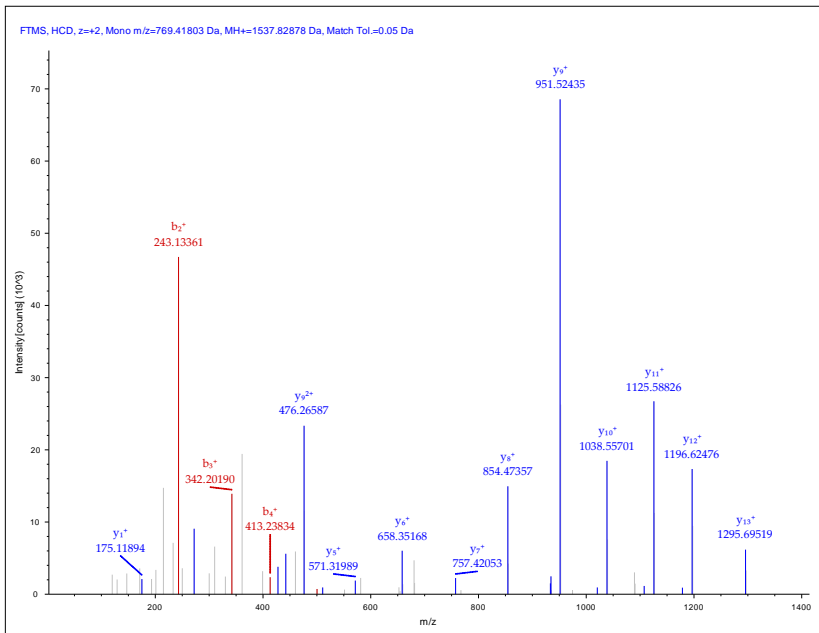

Experiment

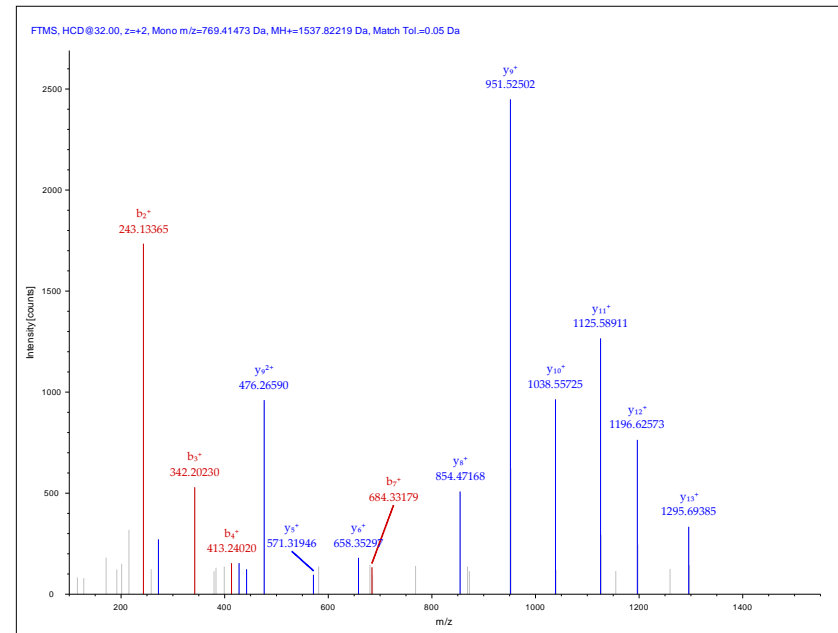

Validated

# SSASAVDEPPSSVR

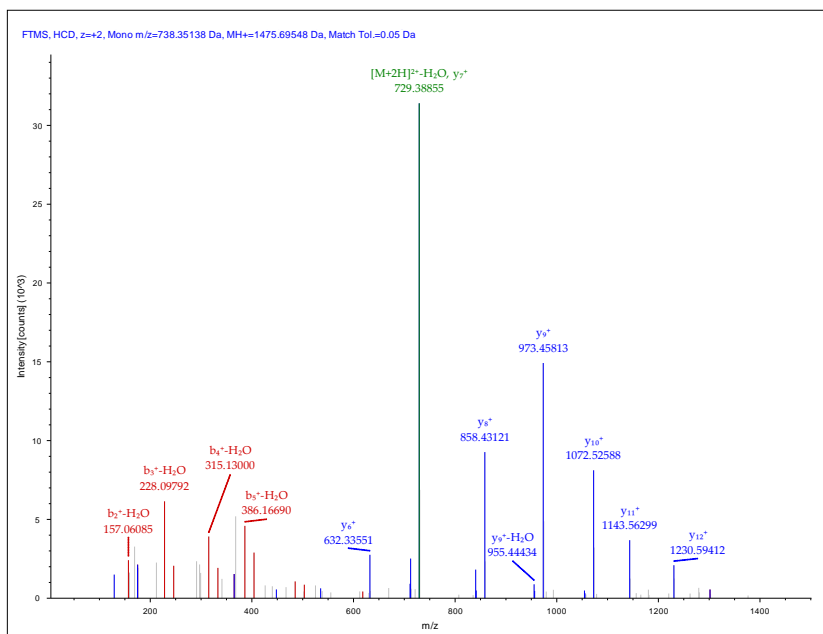

Experiment

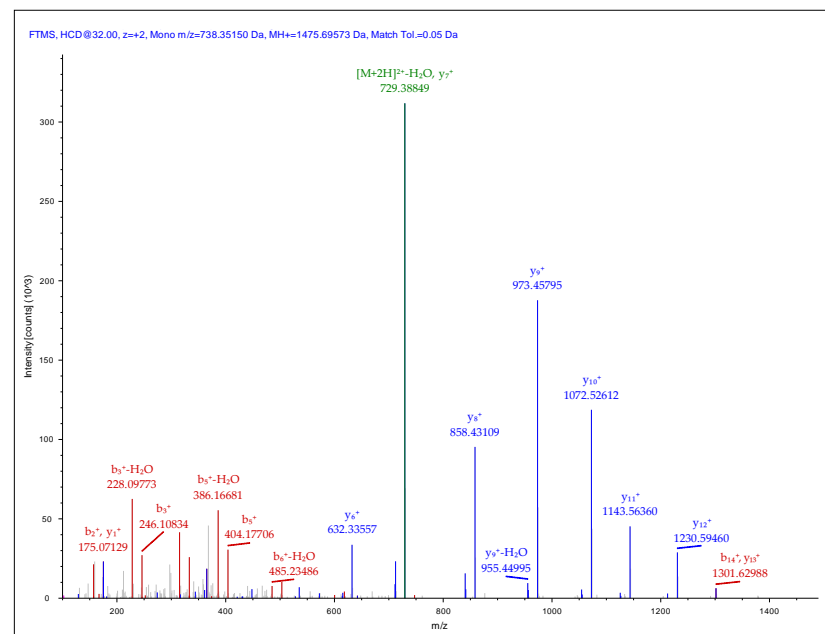

Validated

# TTLTSHVLSHGESPR

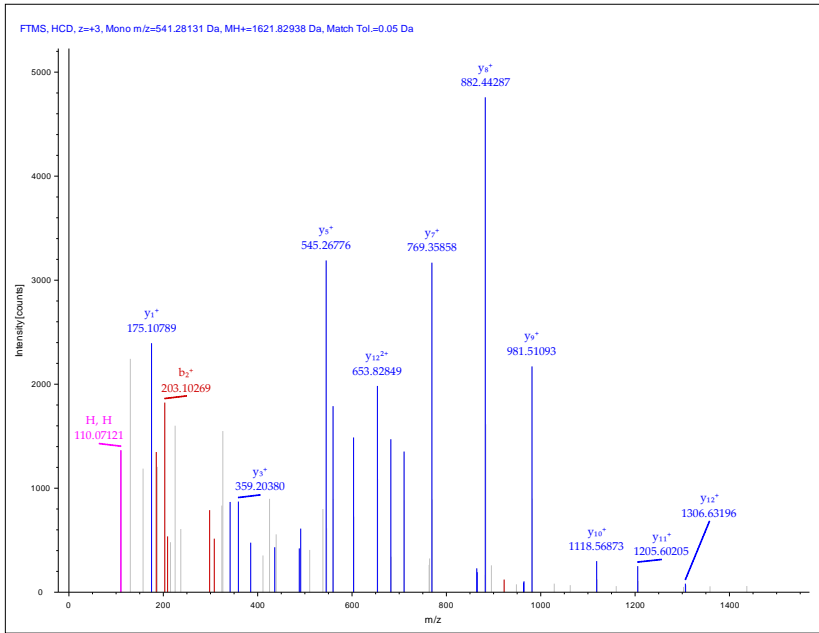

Experiment

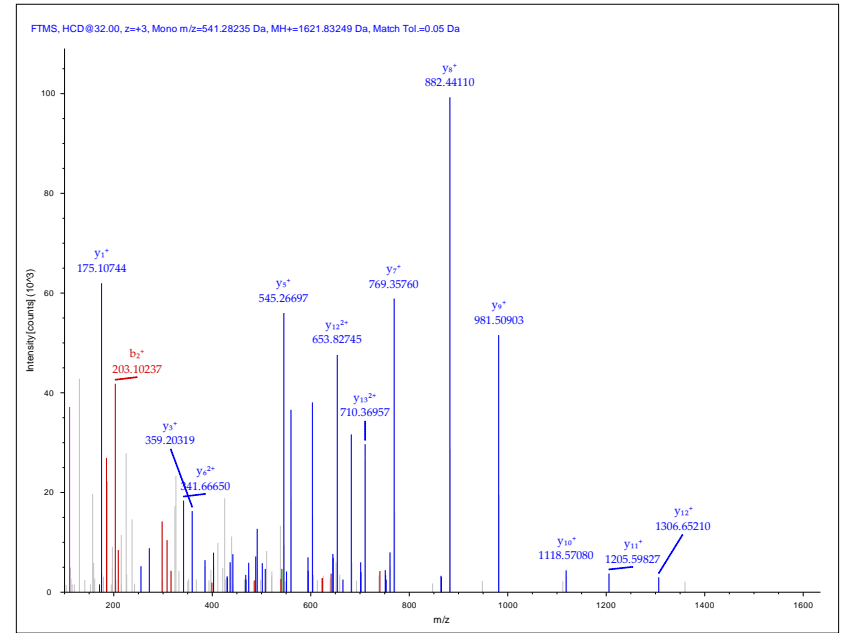

Validated

# LAAASELTDDNFESR

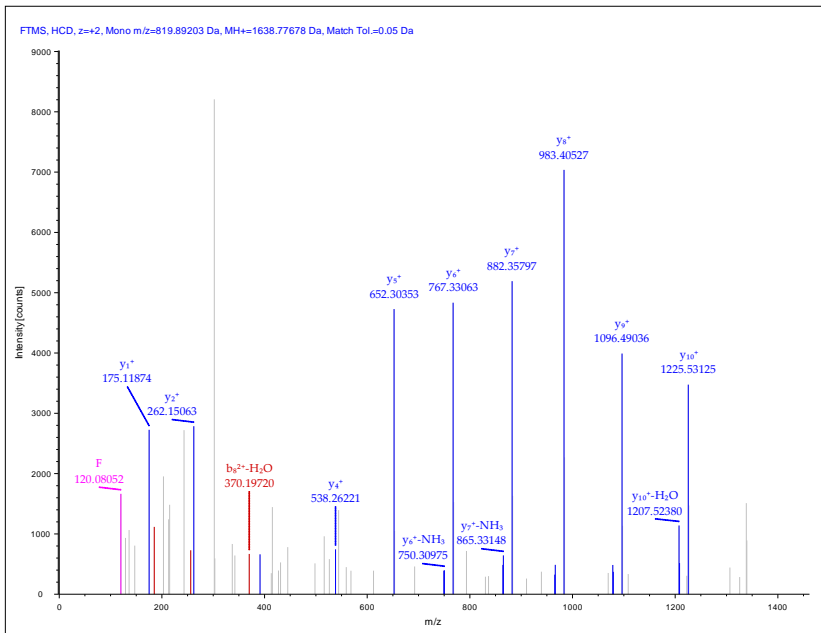

Experiment

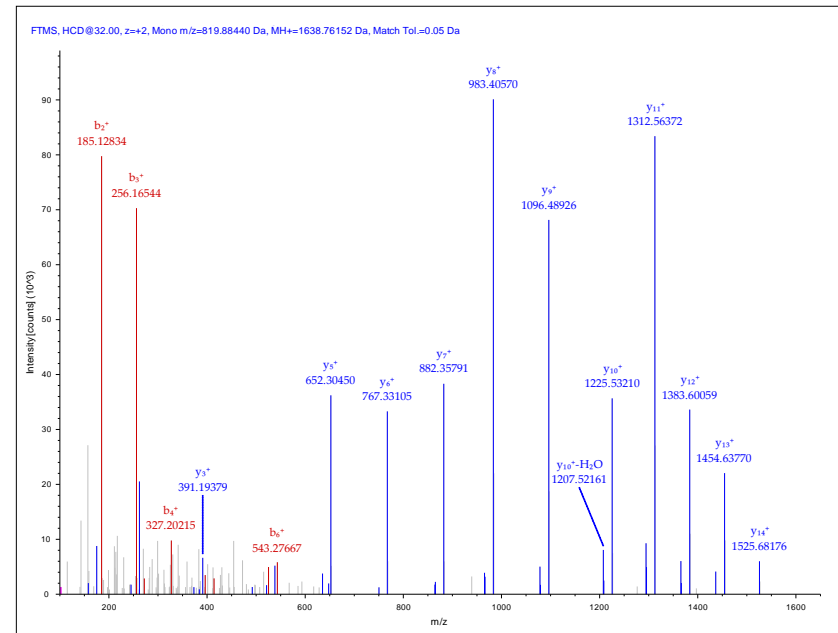

Validated

# DSNQGIYGLSPEGVDR

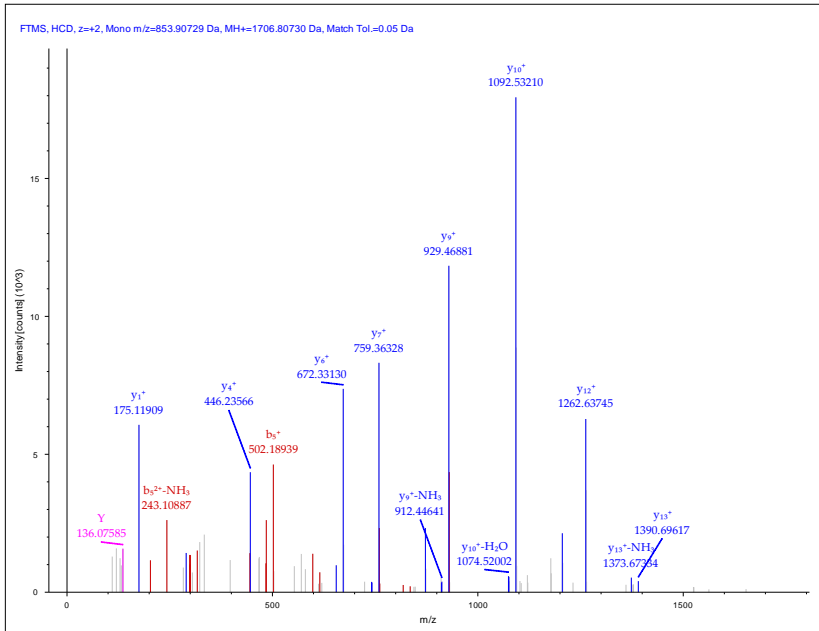

Experiment

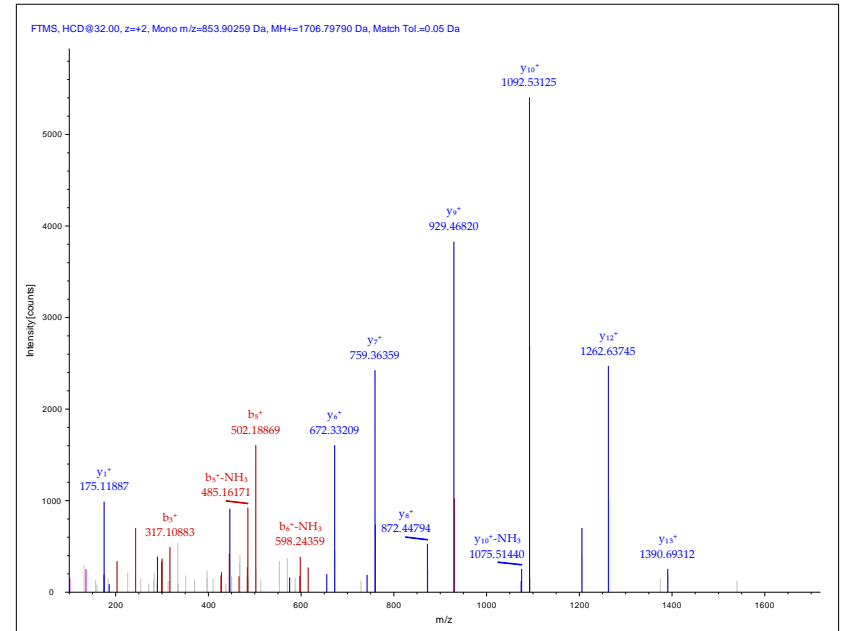

Validated

# LLGALEQSQLASGATR

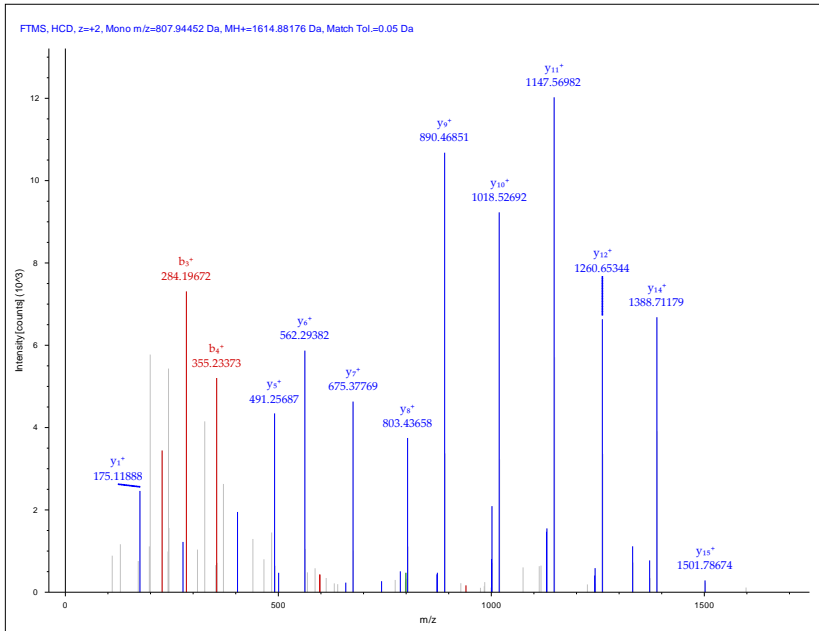

Experiment

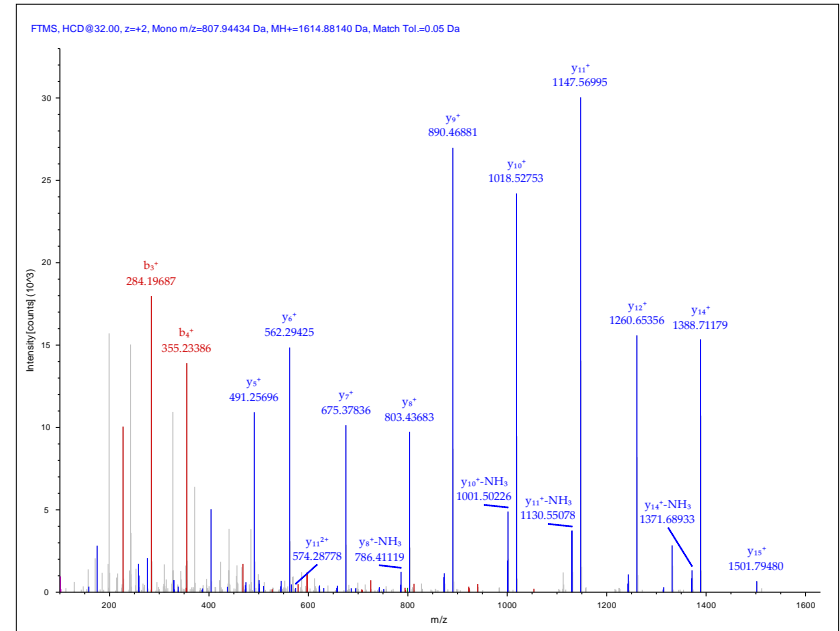

Validated

# DSL<sub>2</sub>YLSSPKPYVPLGTPR

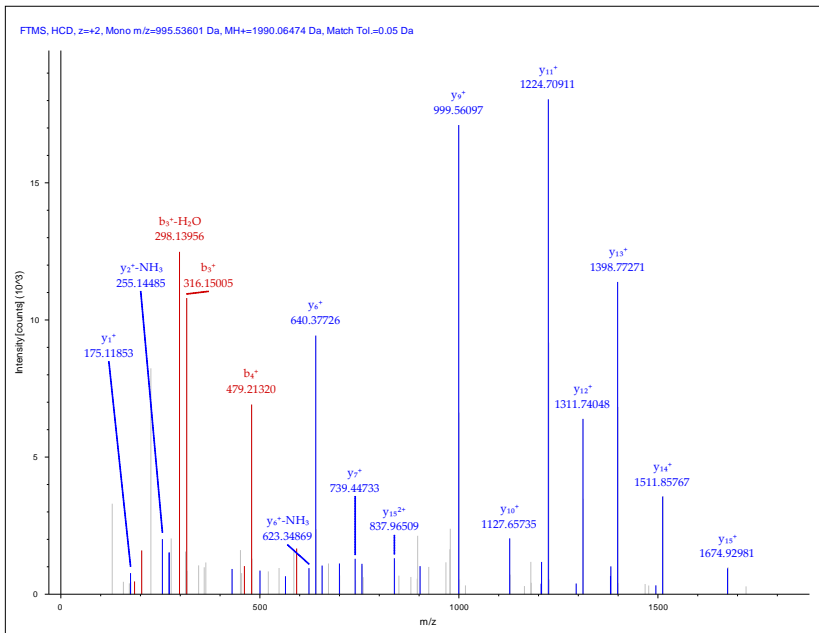

Experiment

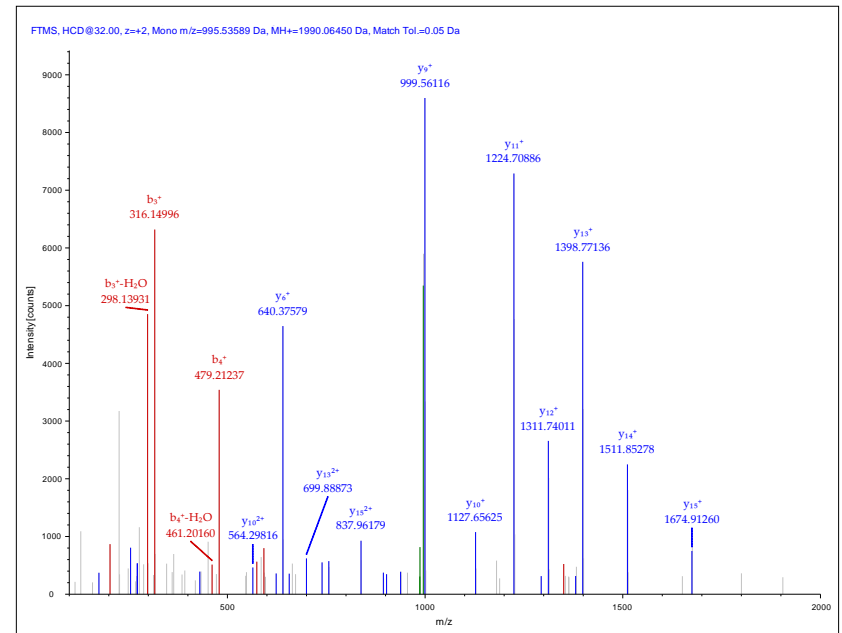

Validated



# LASQGGDDLDPNYVLSSR

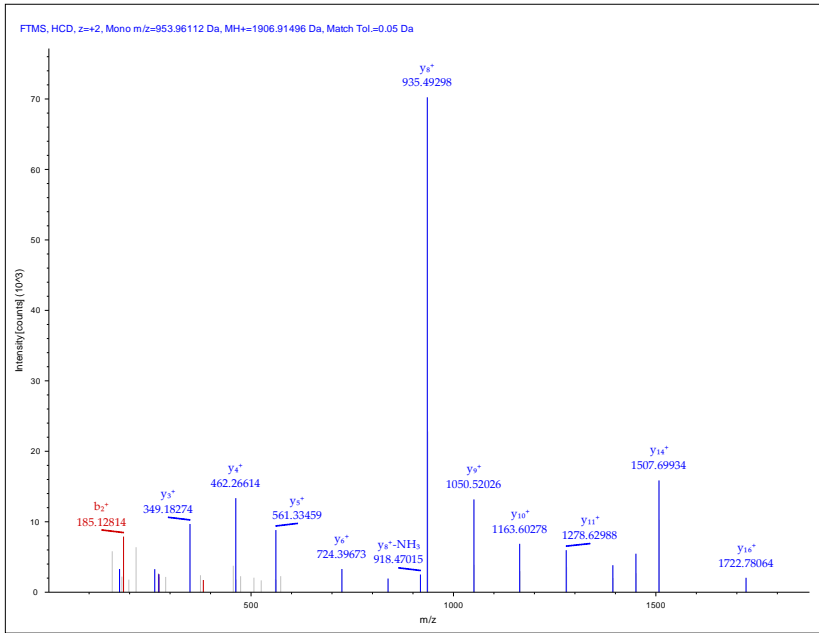

Experiment

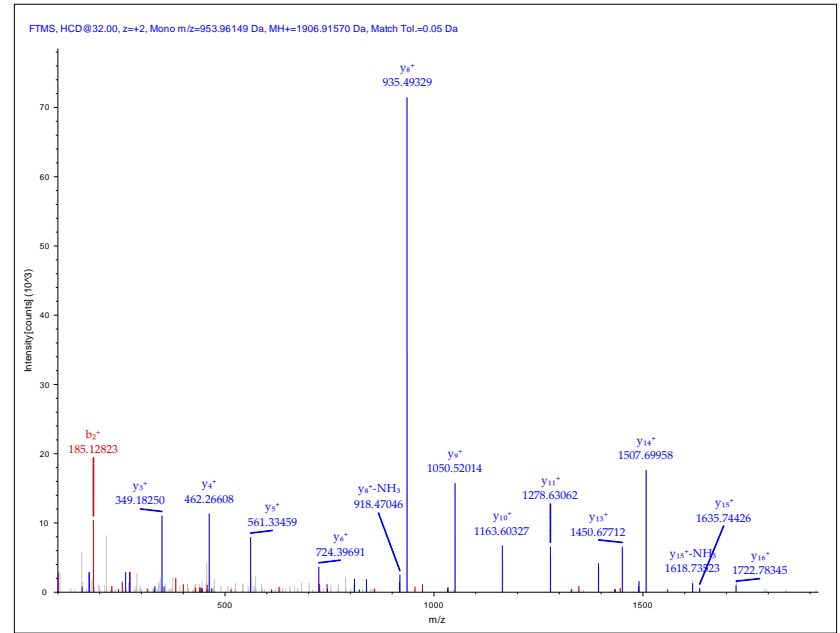

Validated

# ASEAASQASPSAVTSKPR

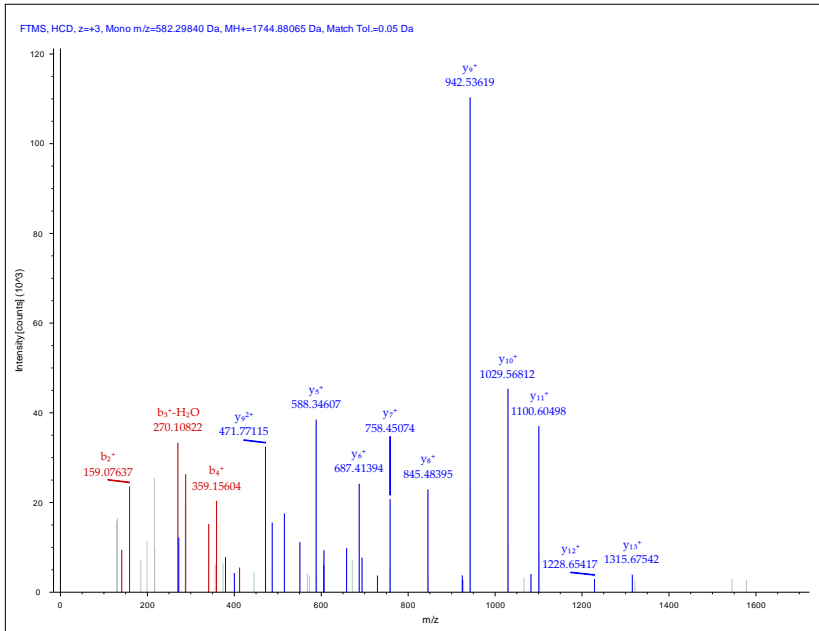

Experiment

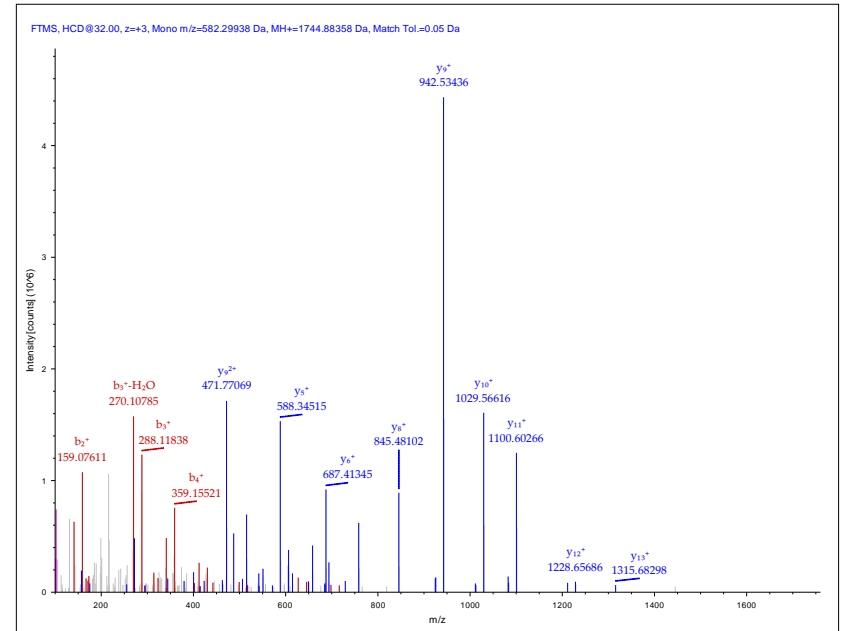

Validated

# SDVDMDPSSATAVLGPARG

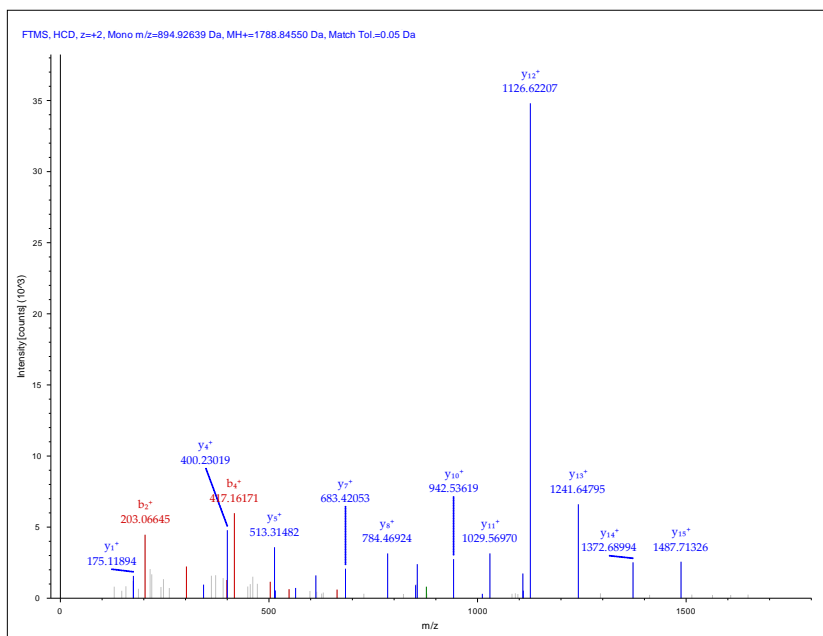

Experiment

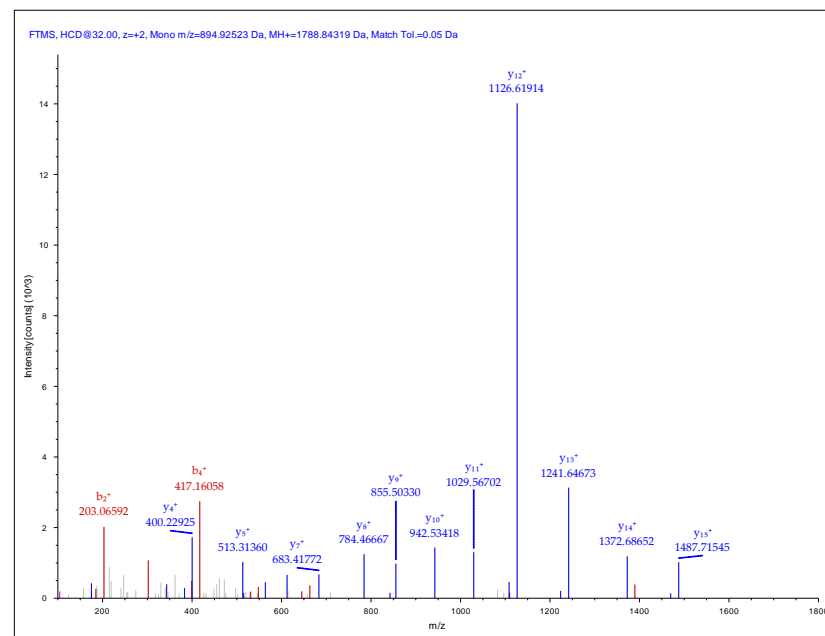

Validated

# VLSAPPFTPSLLEQEV

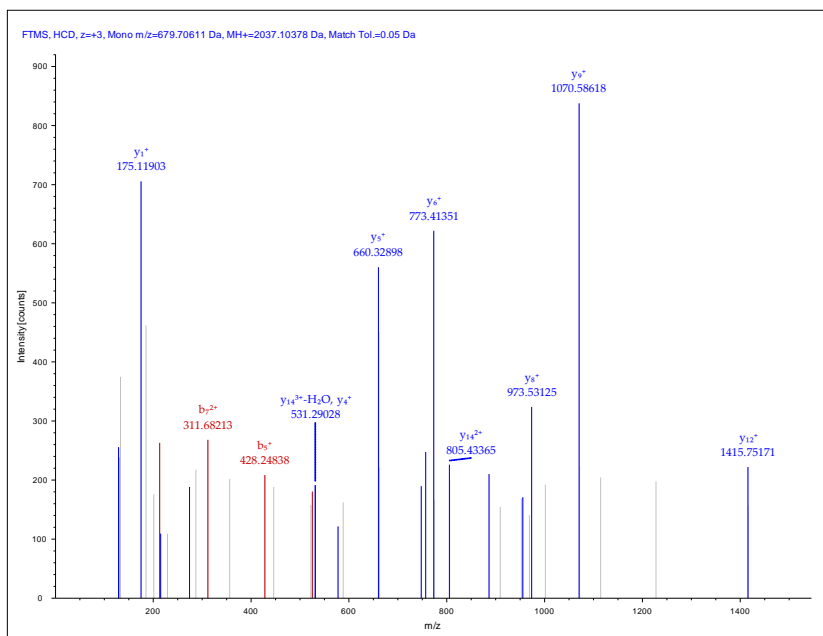

Experiment

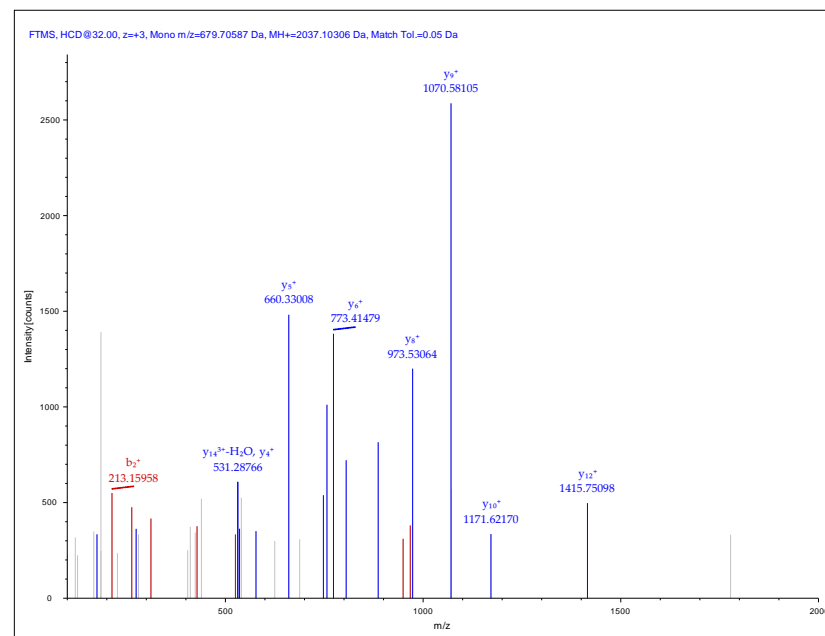

Validated

# SLPNDVSSEAPVGQAEQQR

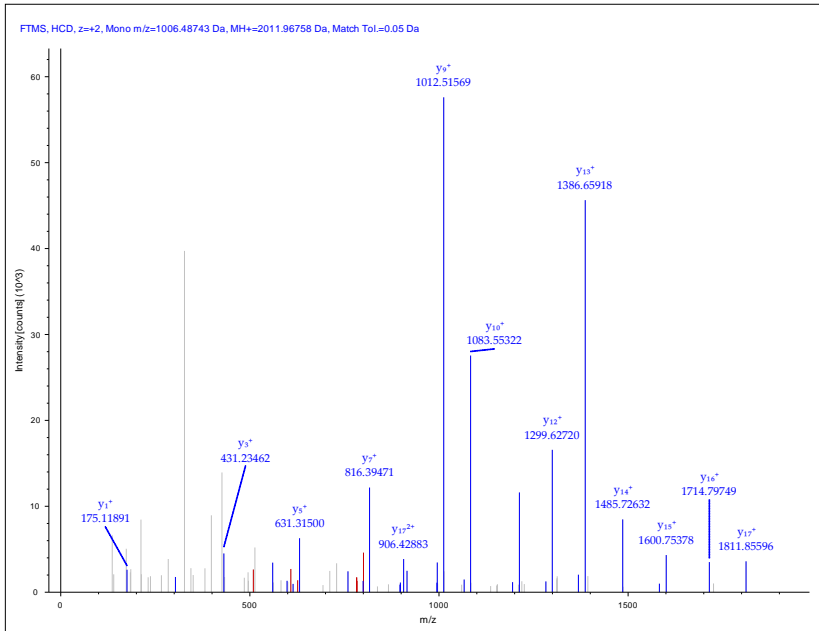

Experiment

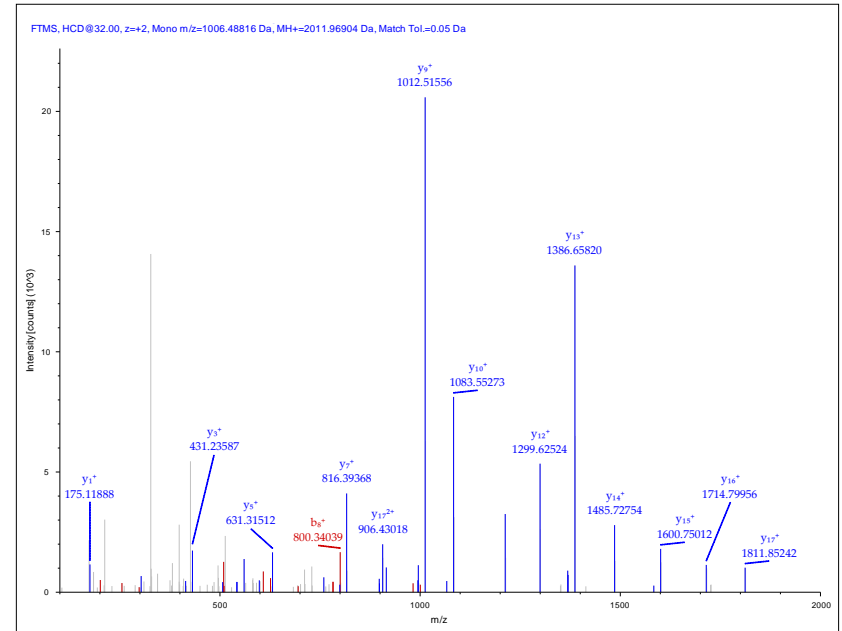

Validated

# MQHSLAGQTYAVPLIQPDLR

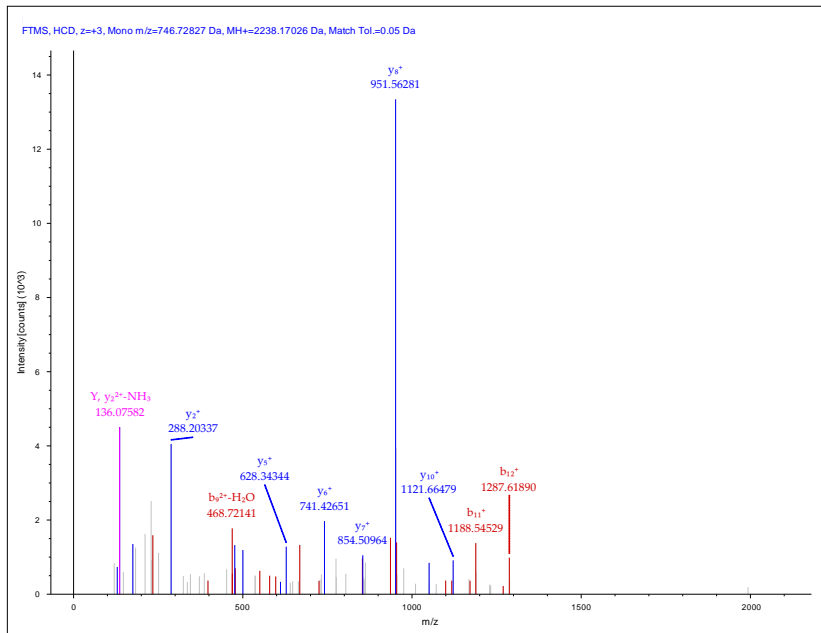

Experiment

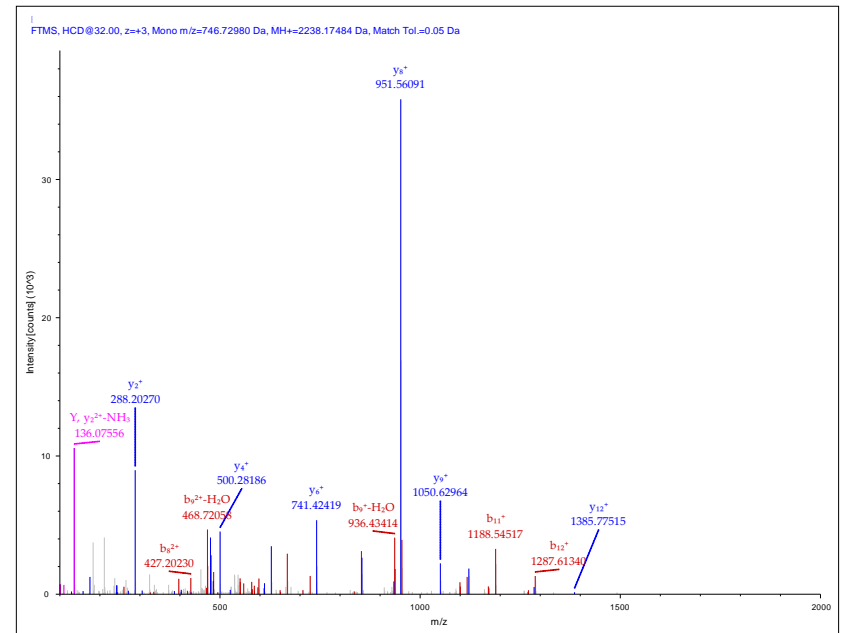

Validated

# GLKVPPAINQFTQALDR

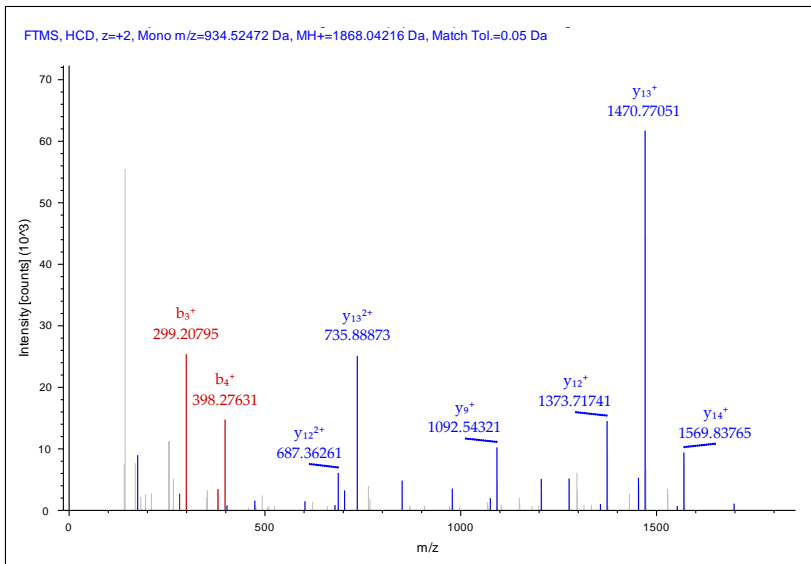

Experiment

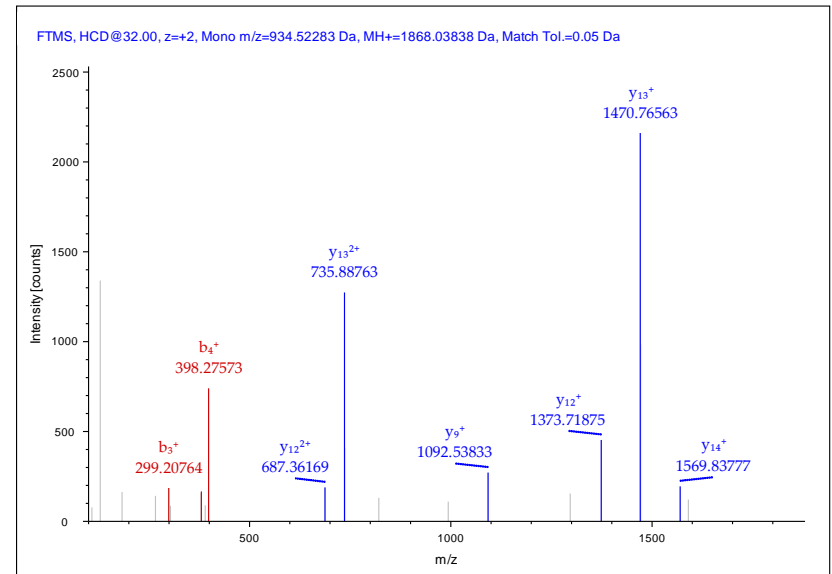

Validated

# RSLSGSADENPSCGTGSER

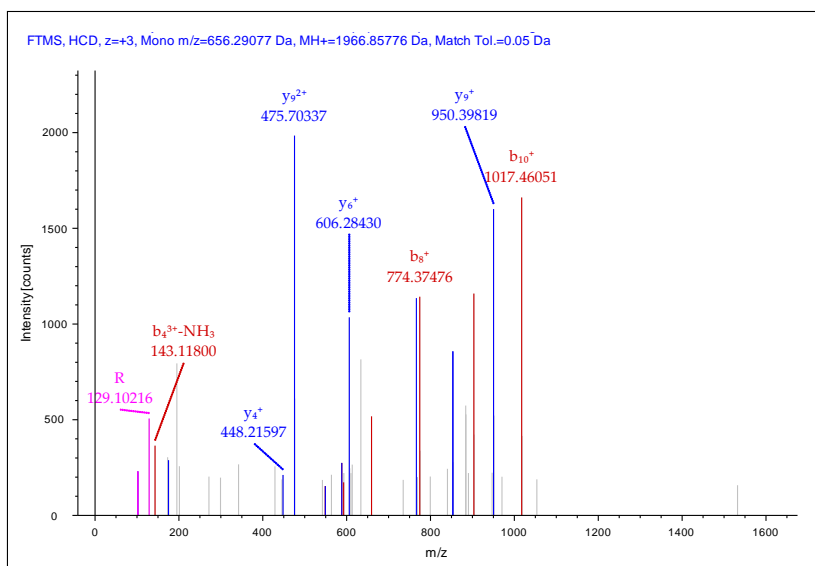

Experiment

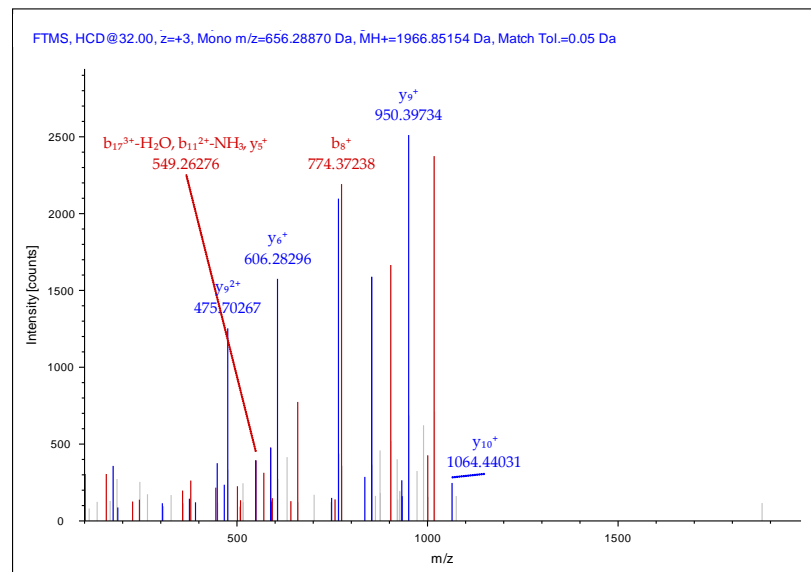

Validated



# EVLVAPAPESTPIITAPTR

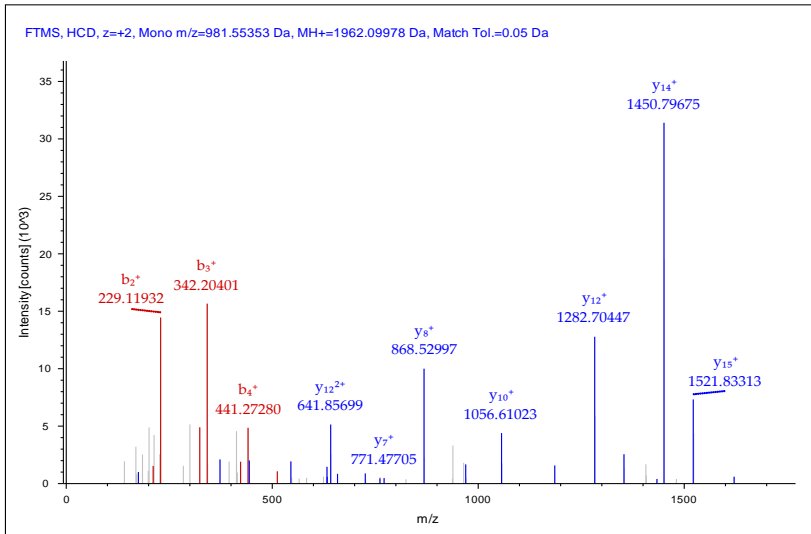

Experiment

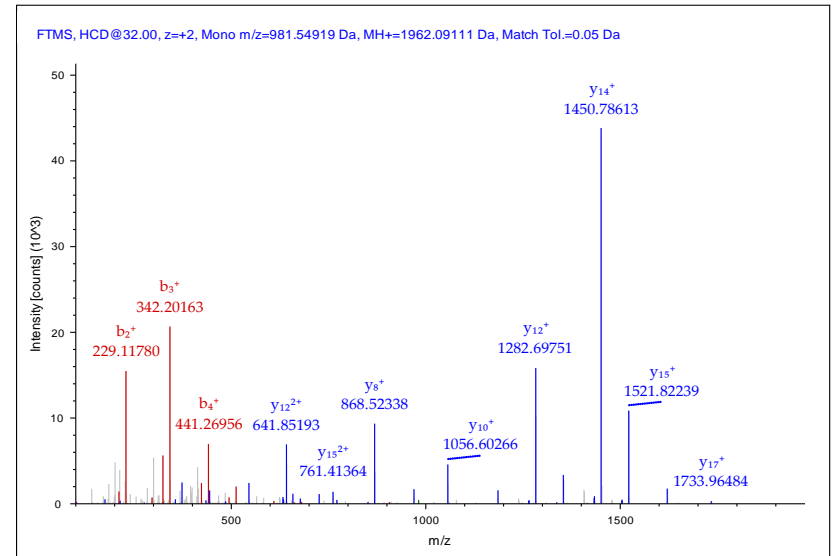

Validated

# AHPPTQLEWLAGWR

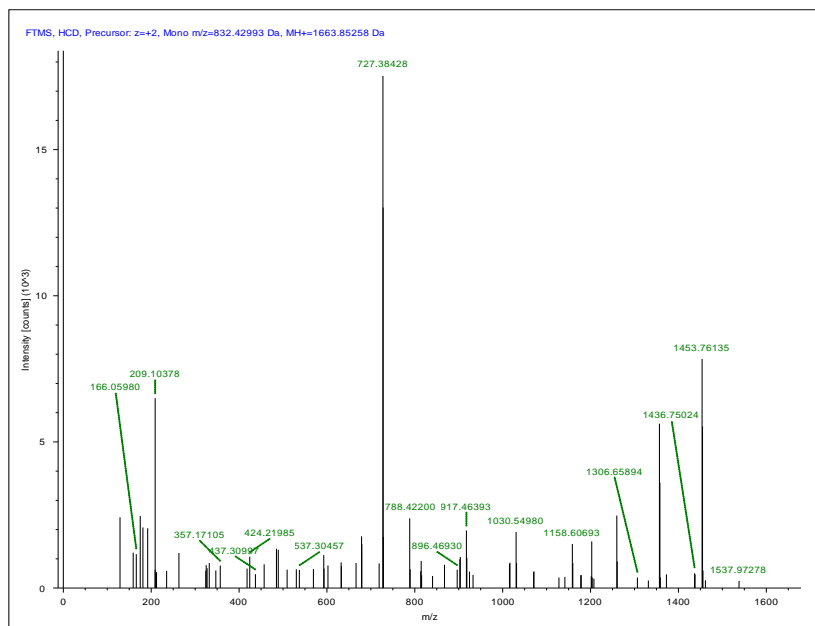

Experiment

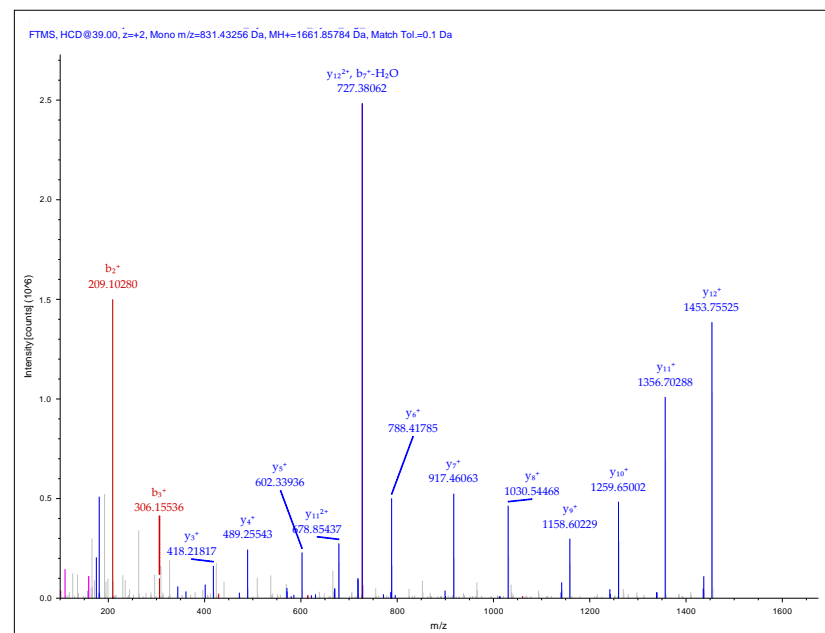

Validated

# NSGPYGGGGQYFAKPR

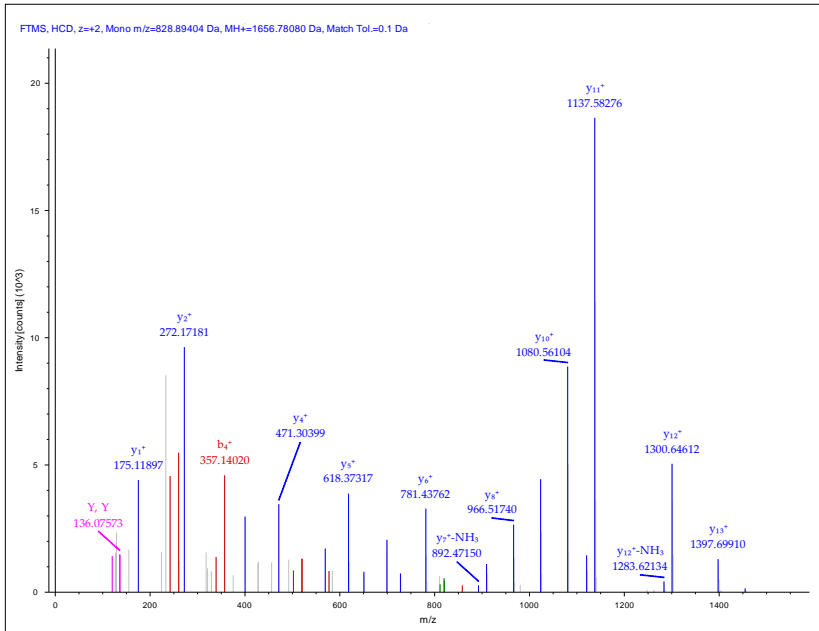

Experiment

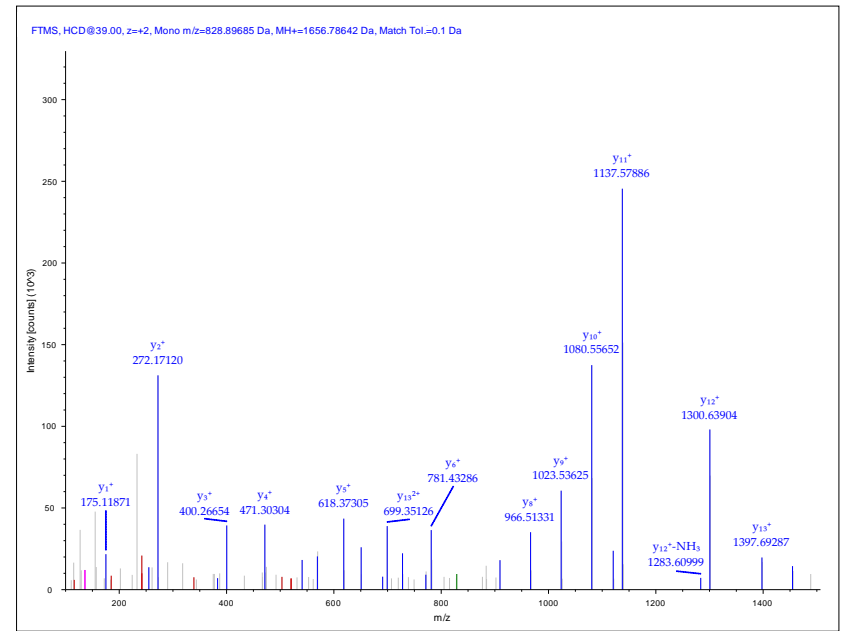

Validated

# LETTVNLAWTAGNSNTR

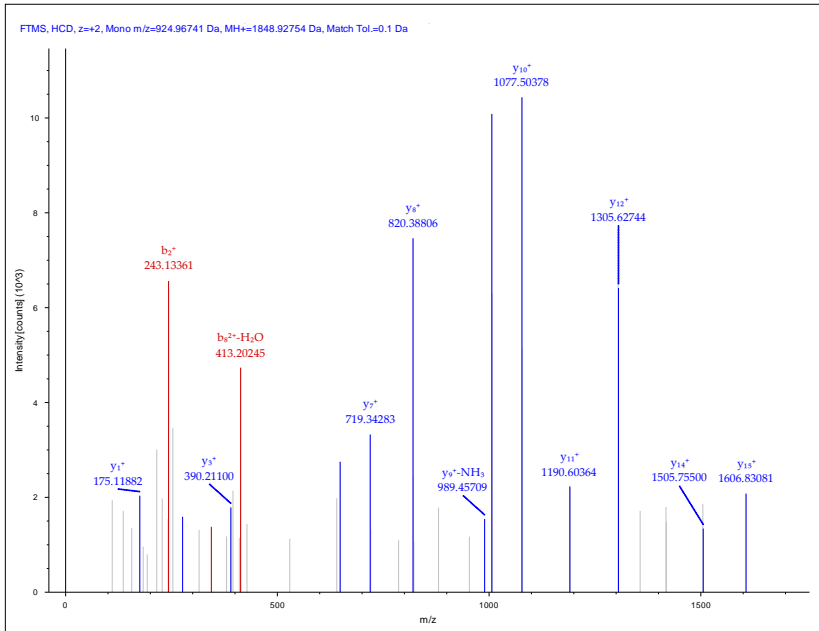

Experiment

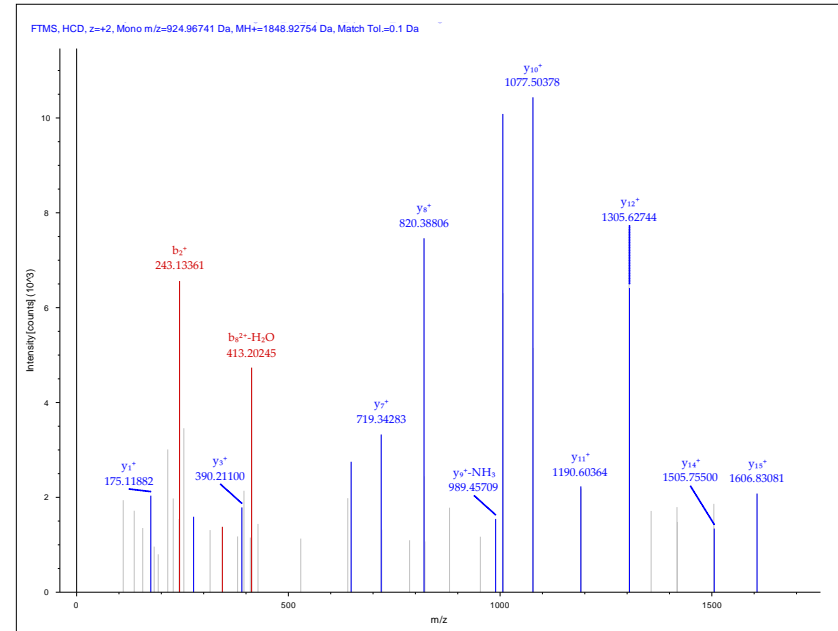

Validated

# KEEGGVADDSAISNLLWR

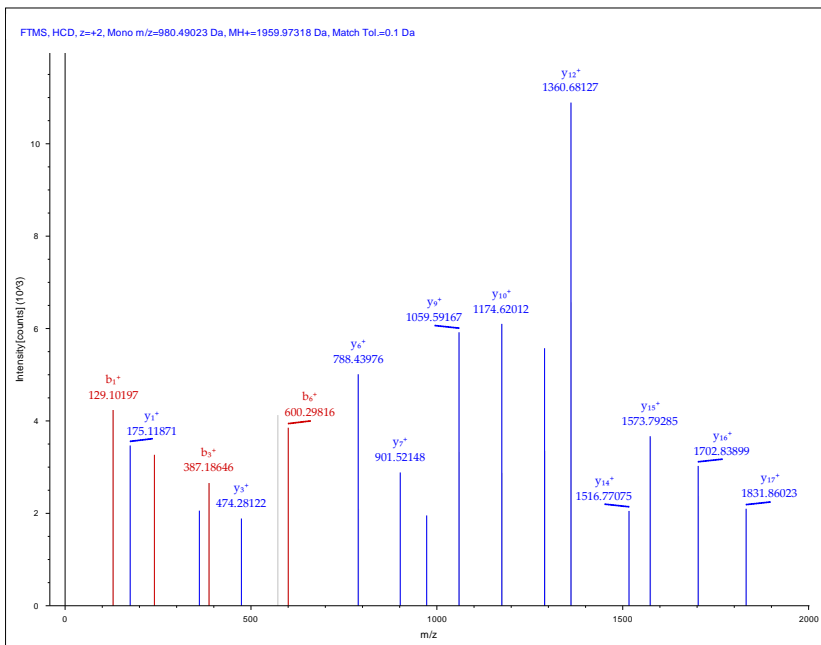

Experiment

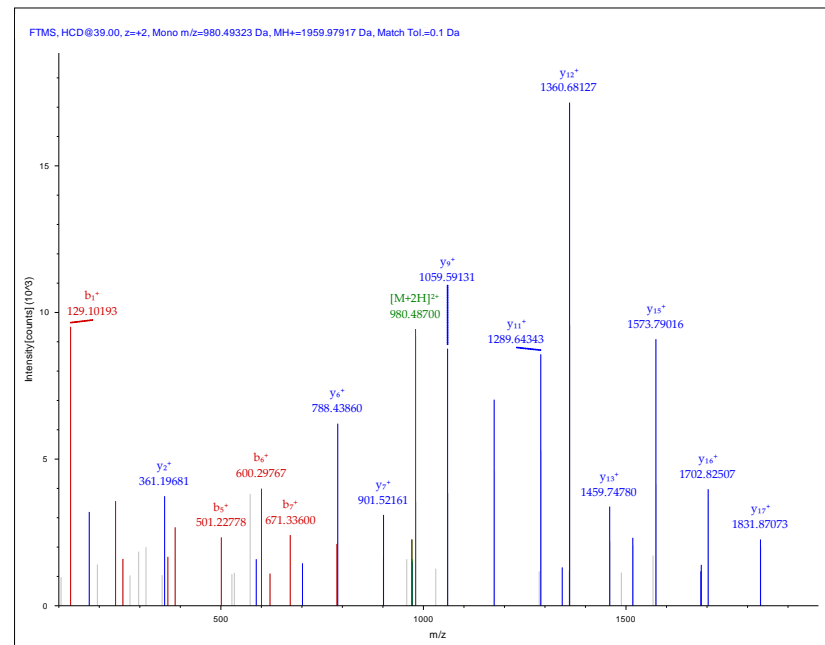

Validated

# WRPQPPAEGPGGELTVPGTTR

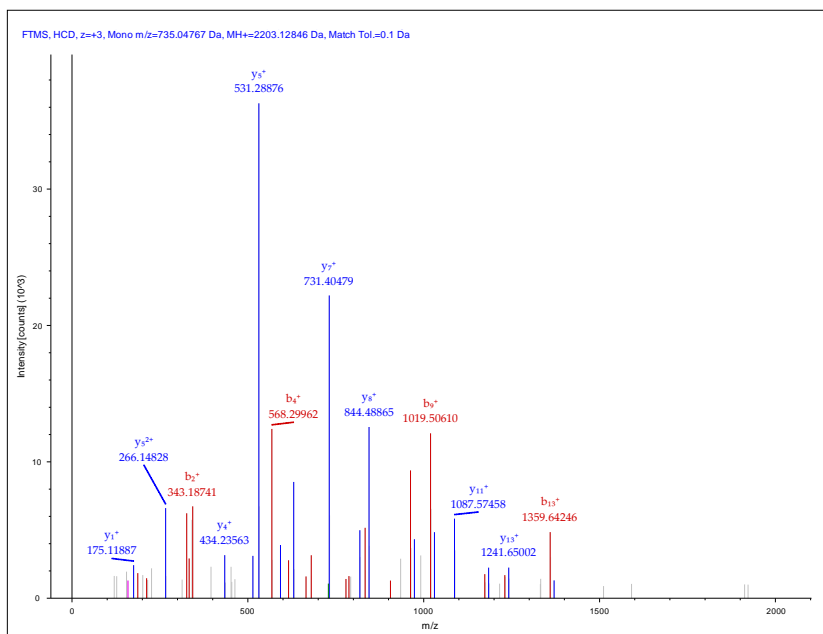

Experiment

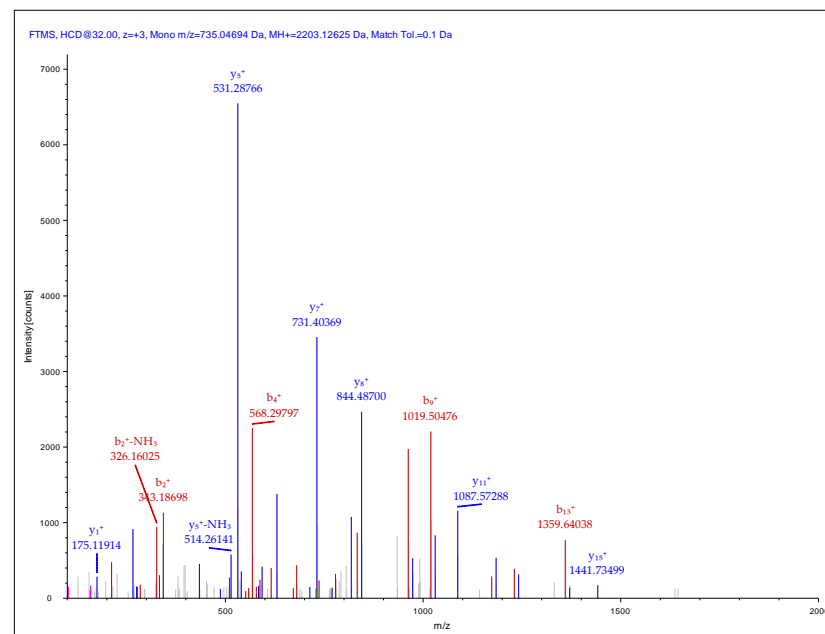

Validated

# LQQENLKPQEQLTLEPYER

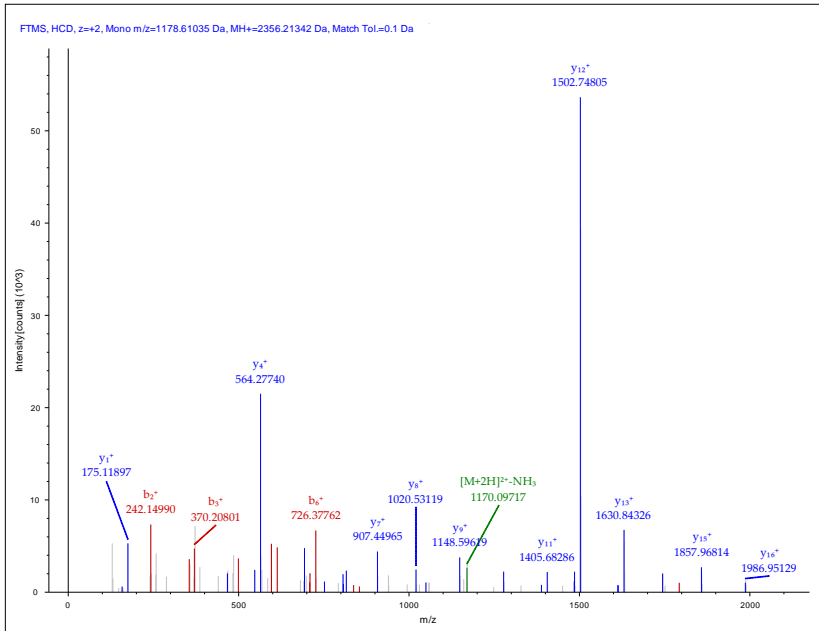

Experiment

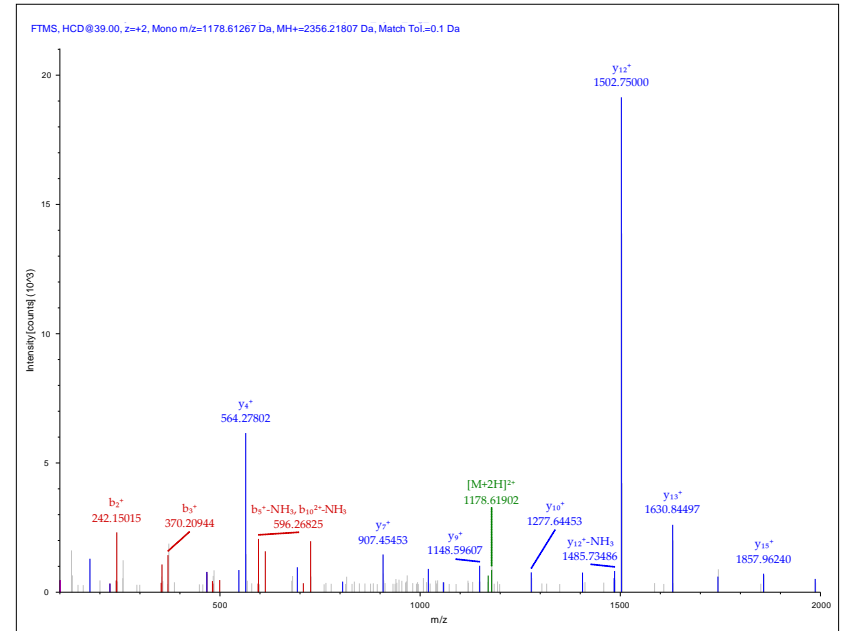

Validated

# LISWYENEFGYSNR

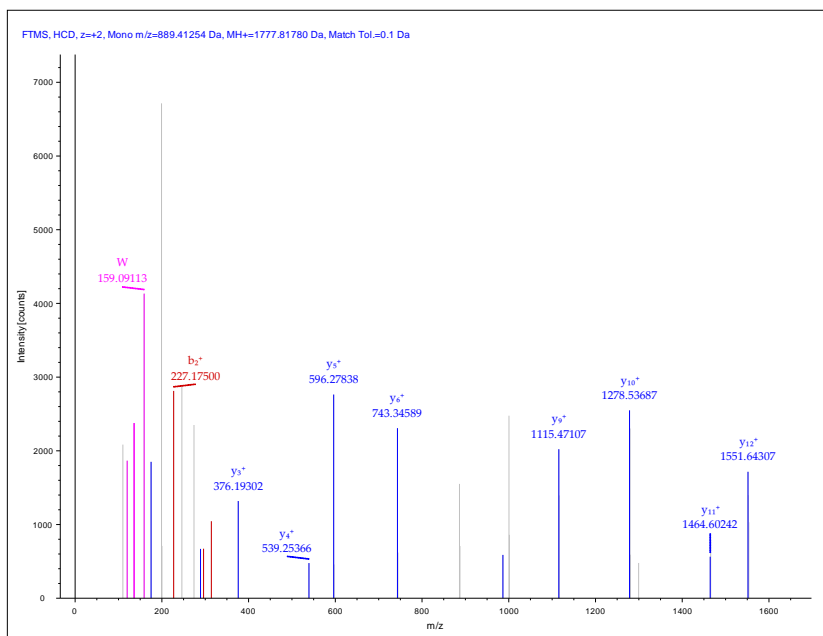

Experiment

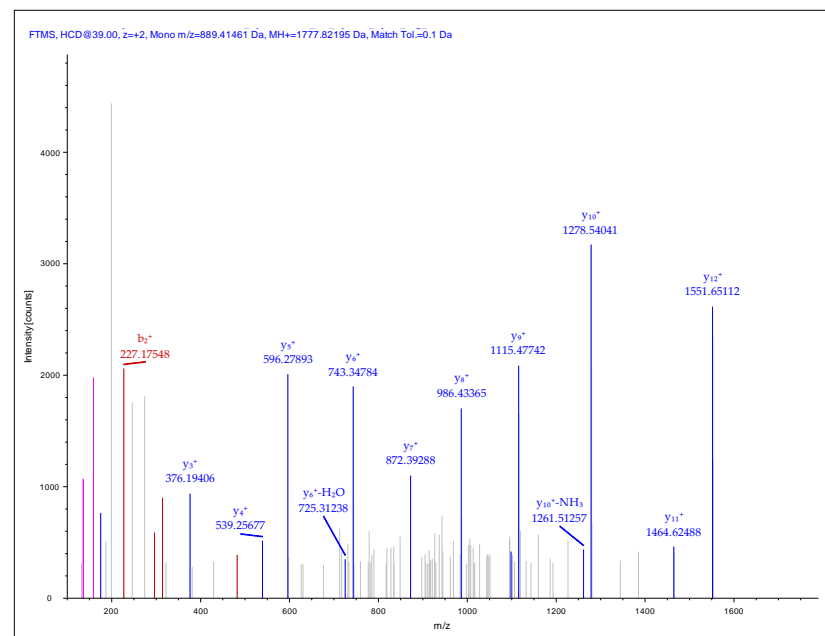

Validated



# SRSDVDMDPSSATAVLGPAR

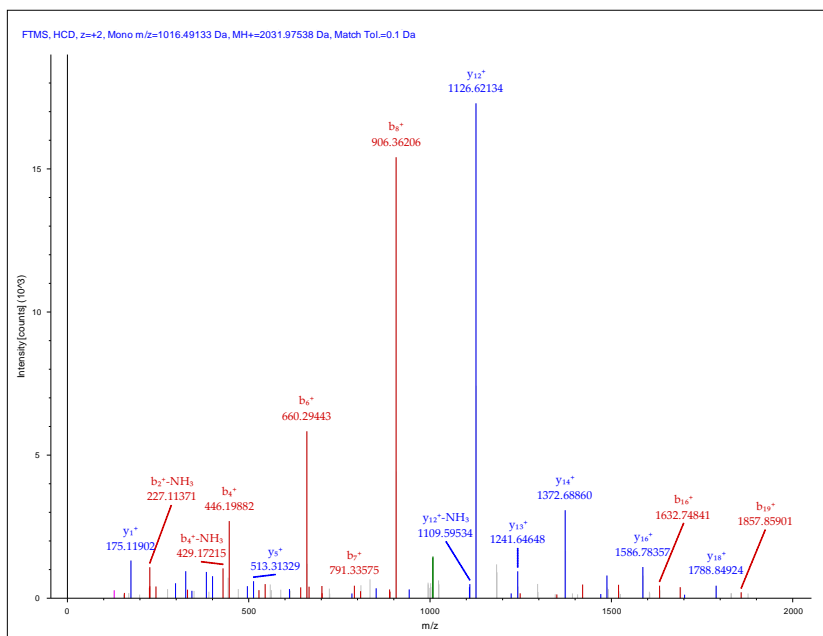

Experiment

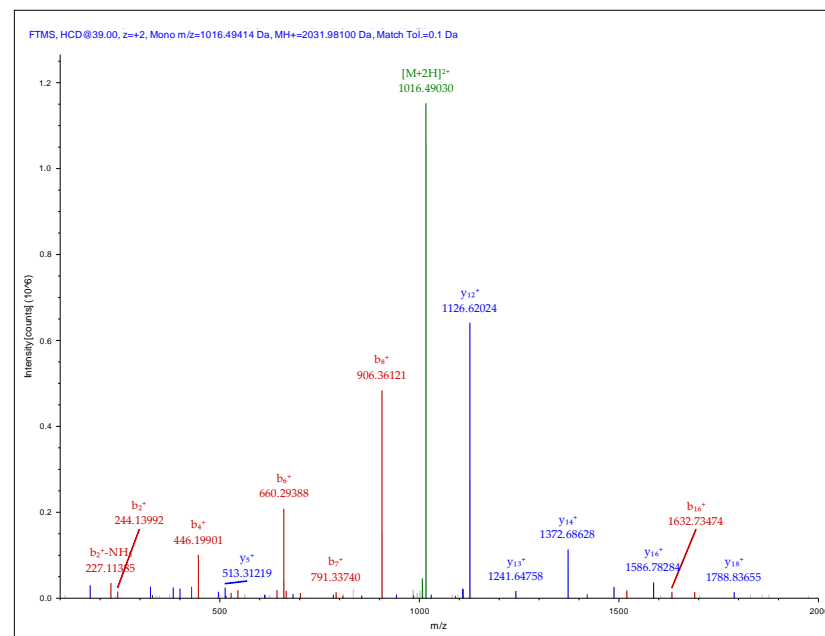

Validated

# SLSGSADENPSCGTGSER

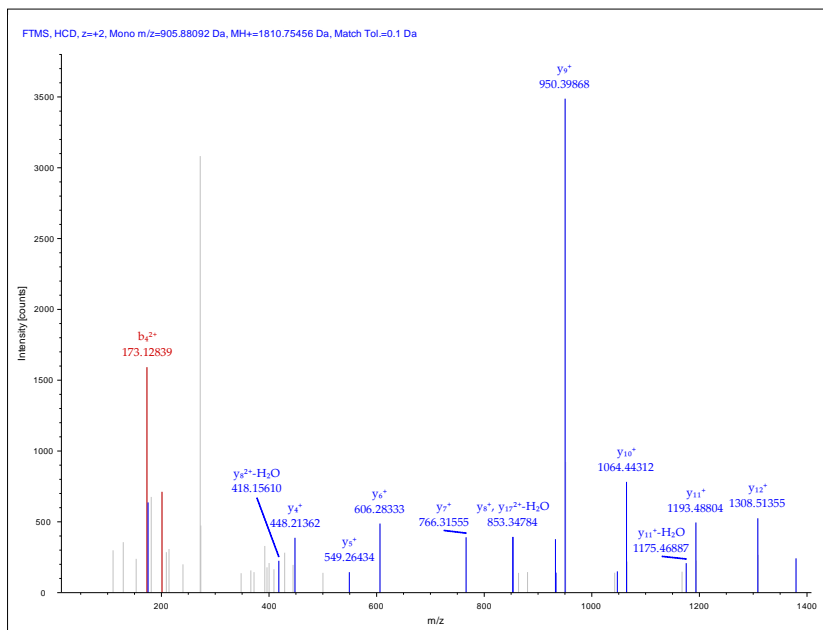

Experiment

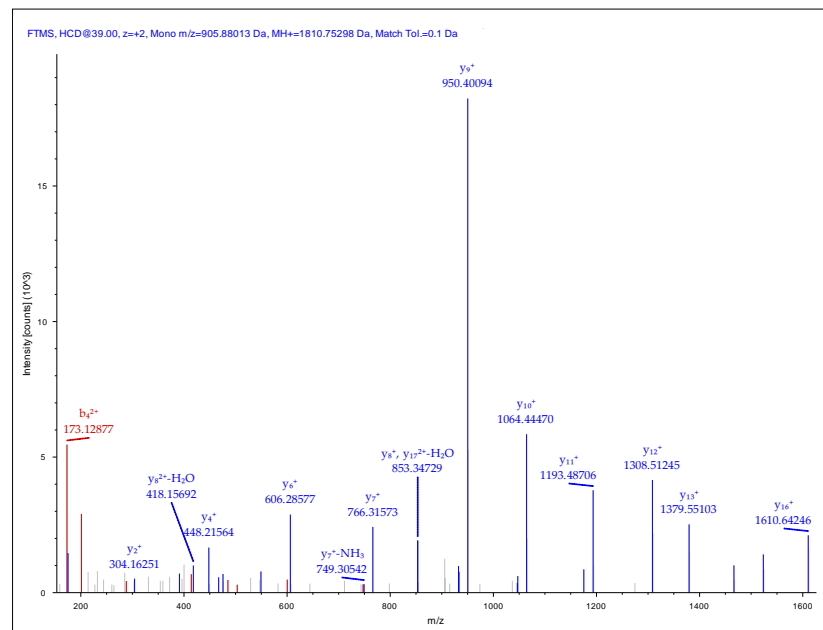

Validated

# RGCEEDVATQQPVSR

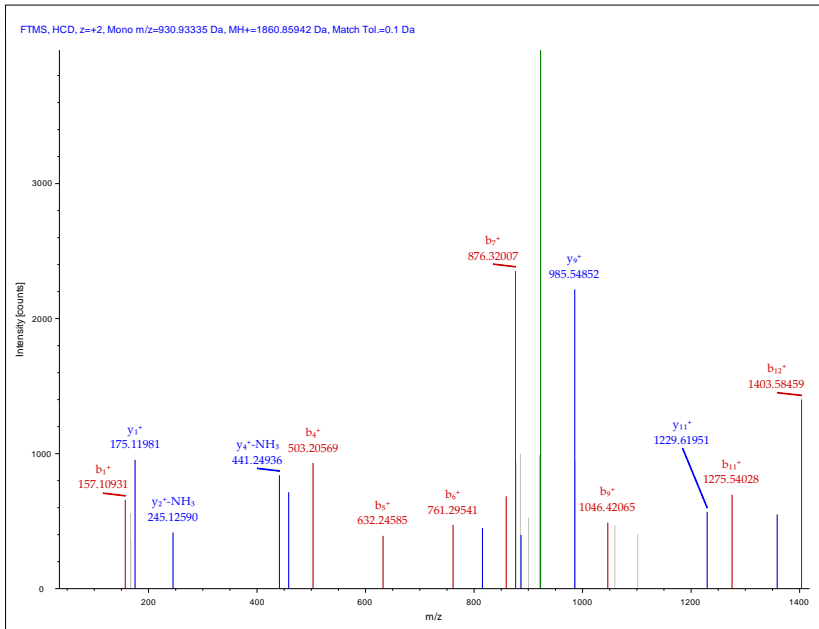

Experiment

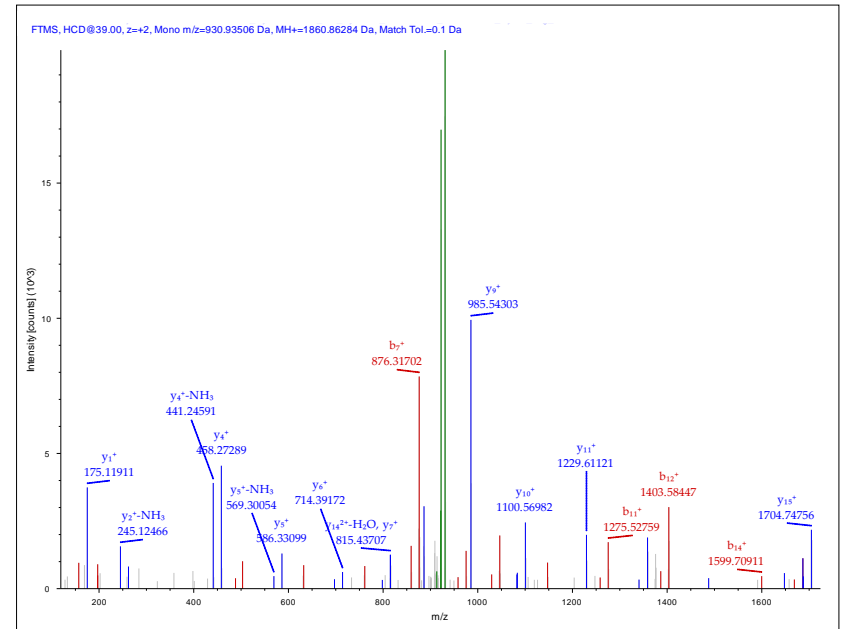

Validated

# QAARSGGGGGGPAGR

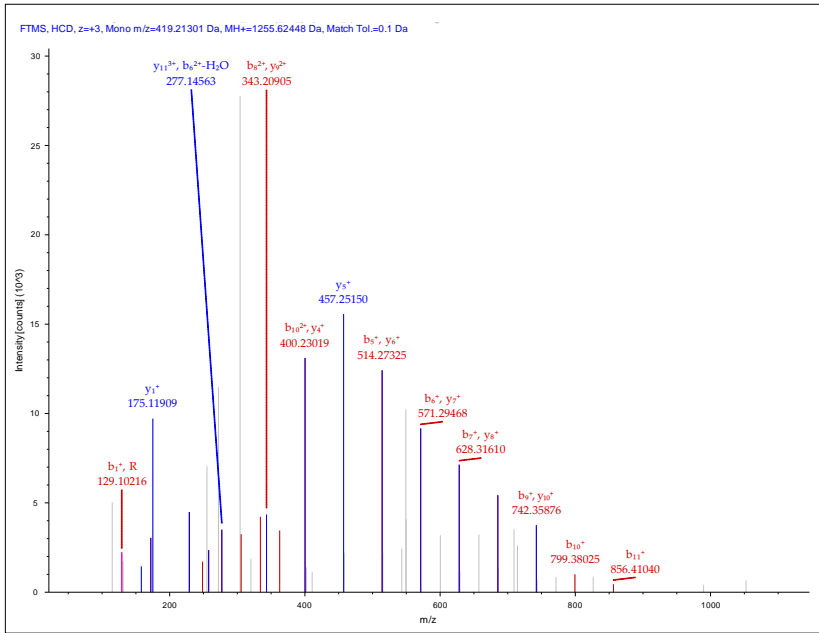

Experiment

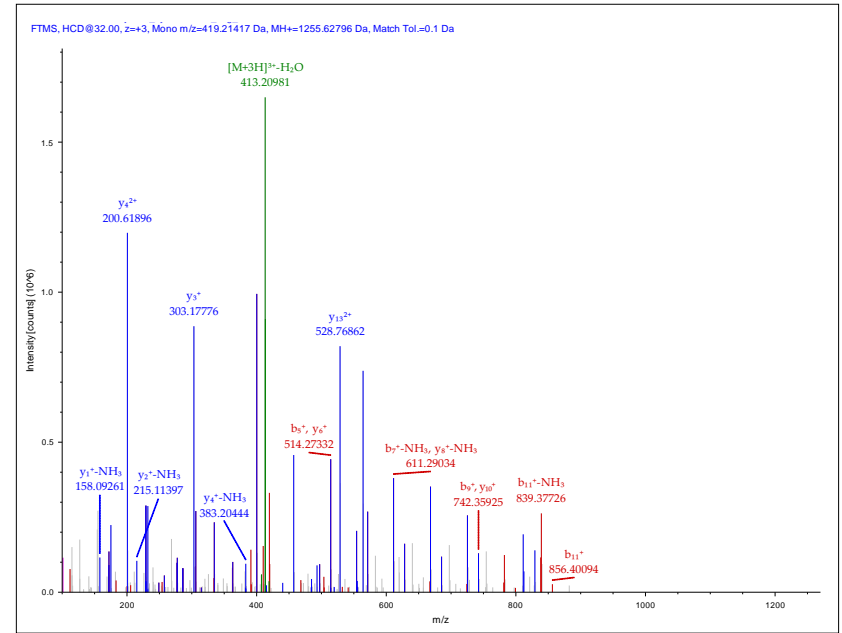

Validated

# ANCIDSTASAEAVFASEVR

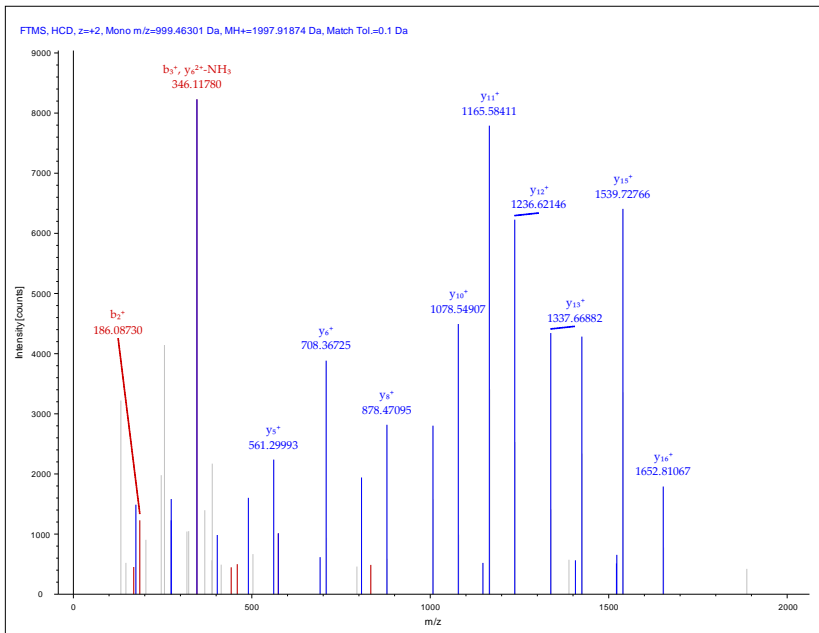

Experiment

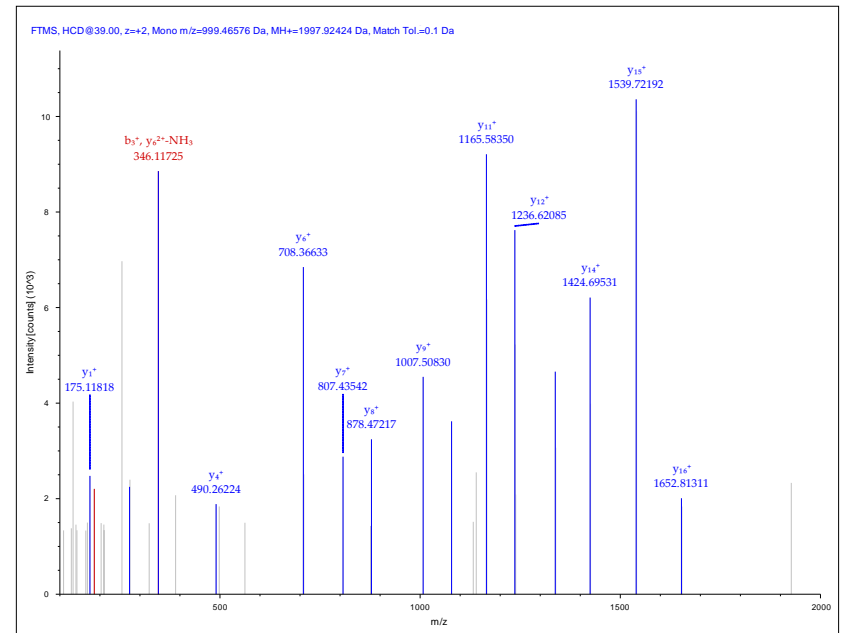

Validated

# QPPLGDHPAEYGEGR

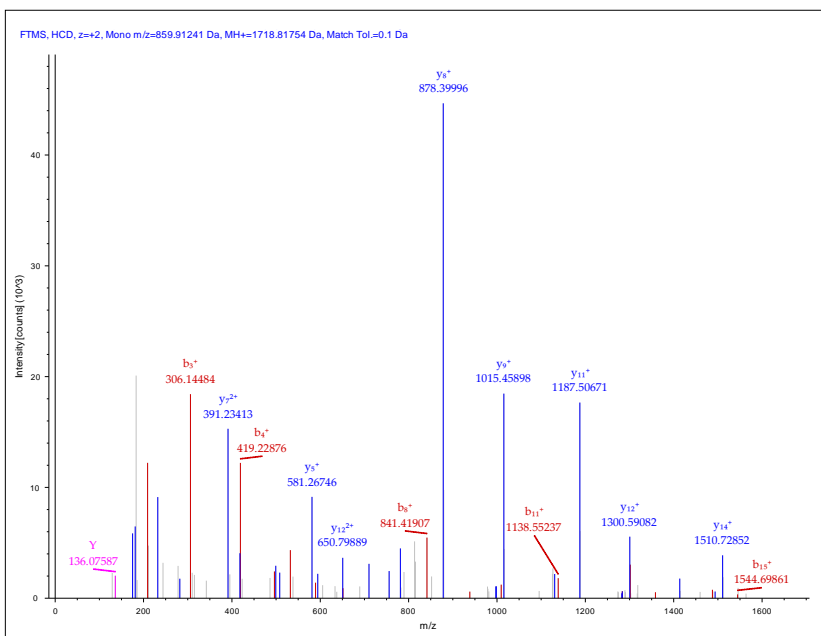

Experiment

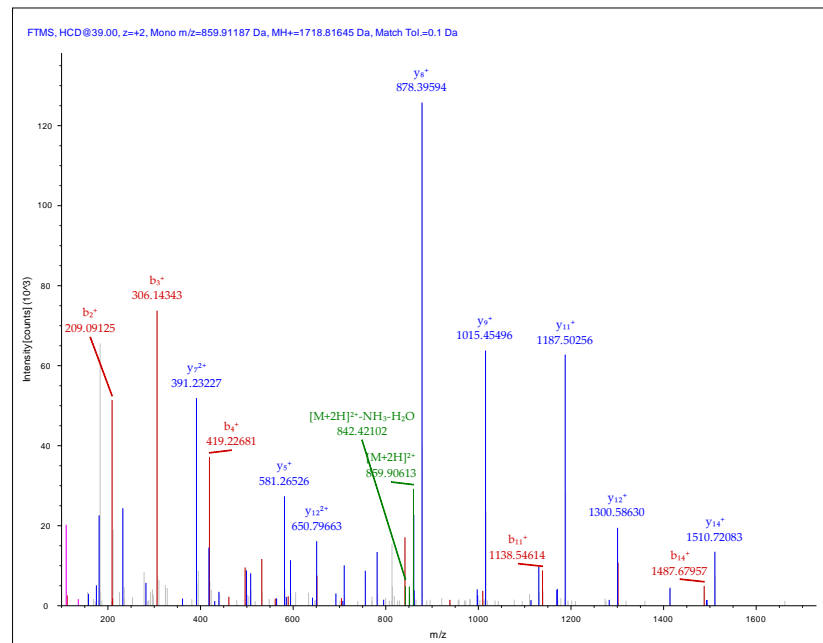

Validated

# QRQPPLLGDHPAEYGEGR

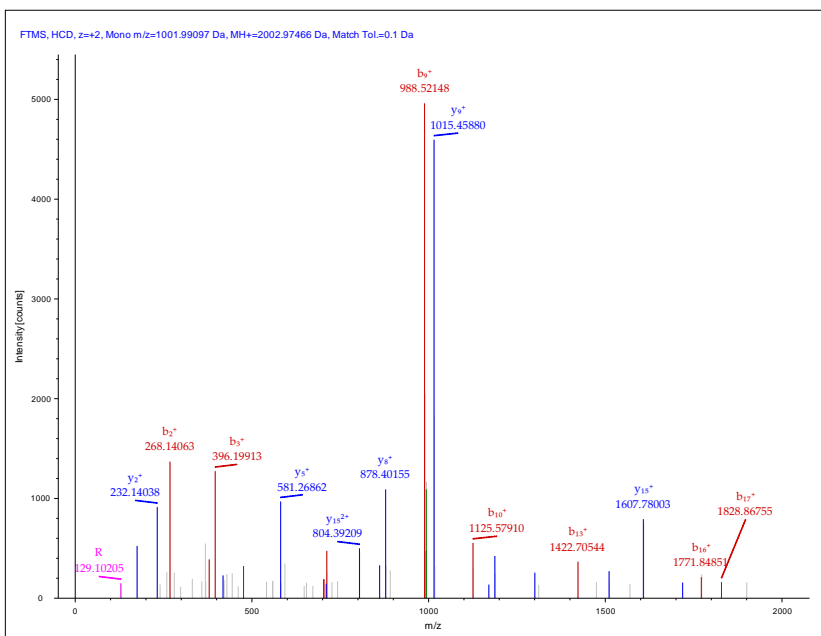

Experiment

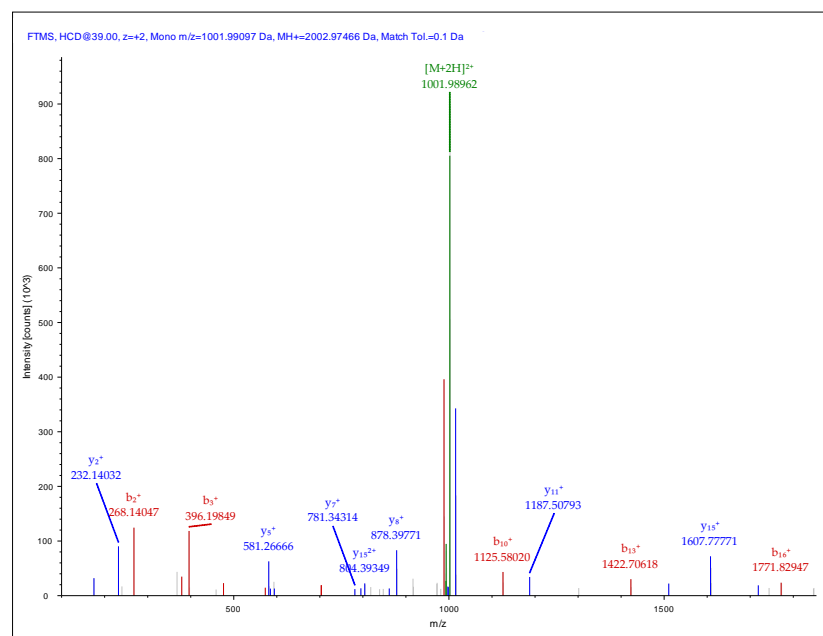

Validated

# IFAPDHVVAK

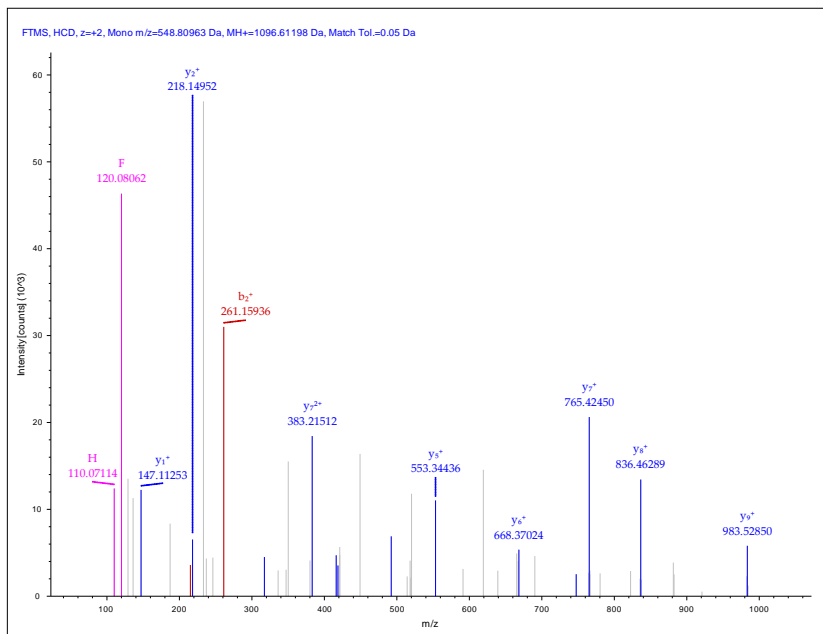

Experiment

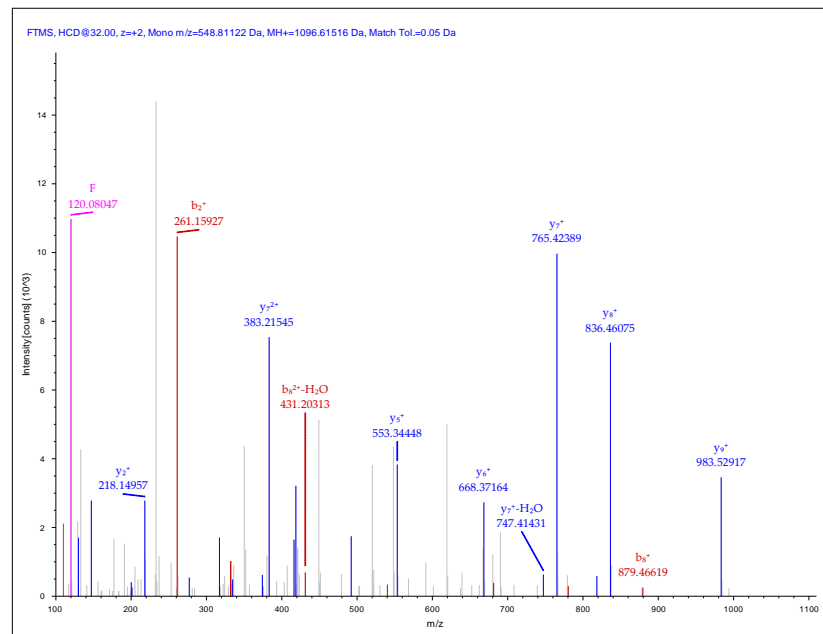

Validated



# NPEVDDSSAQK

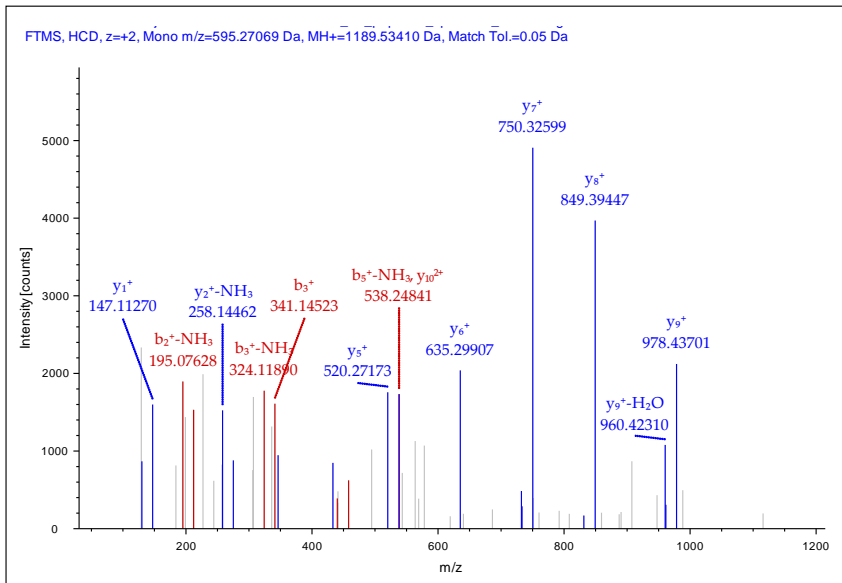

Experiment

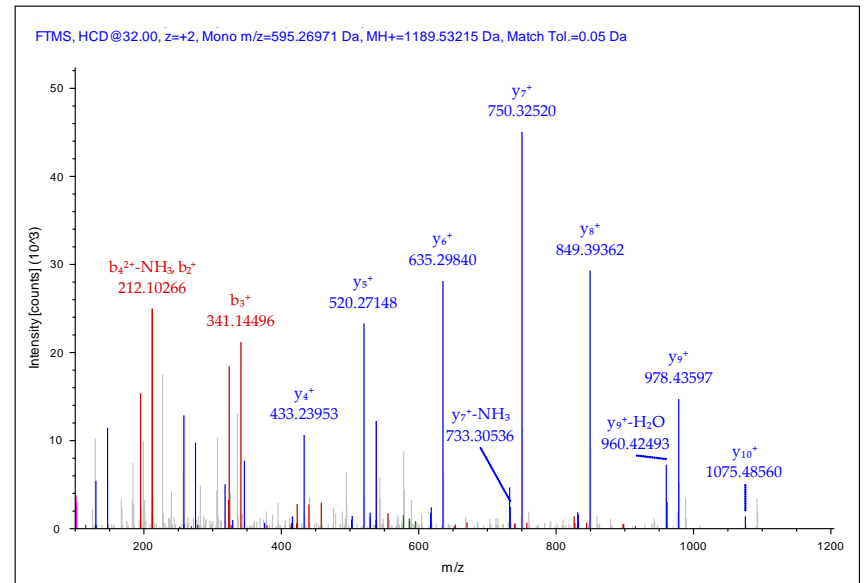

Validated

# IVVDELSNLKK

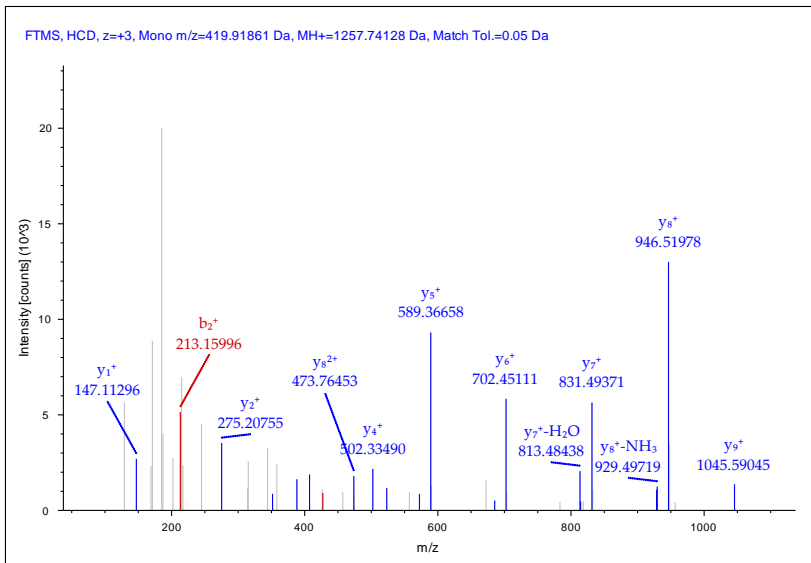

Experiment

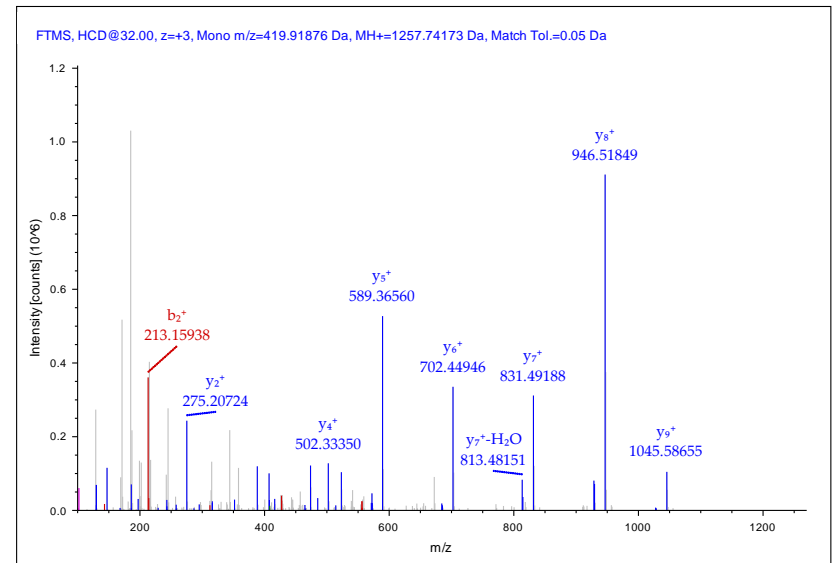

Validated

# LPEFQFSSQNK

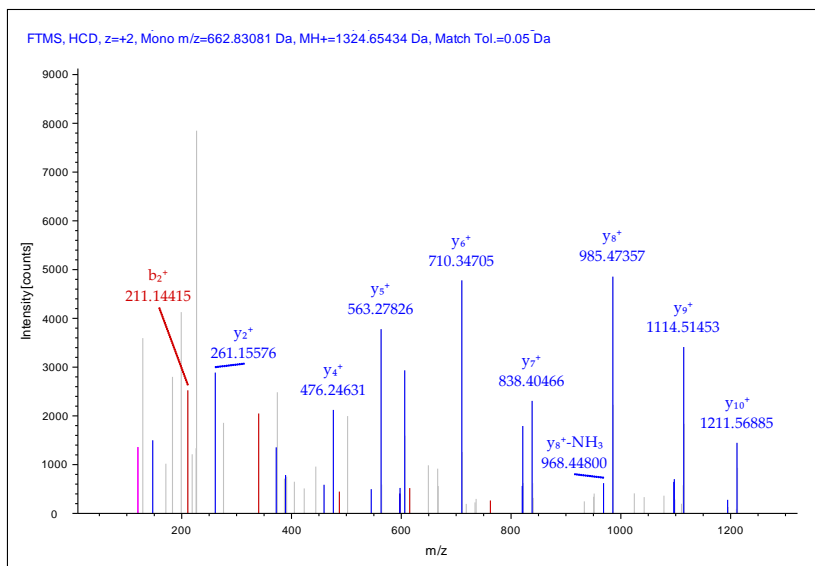

Experiment

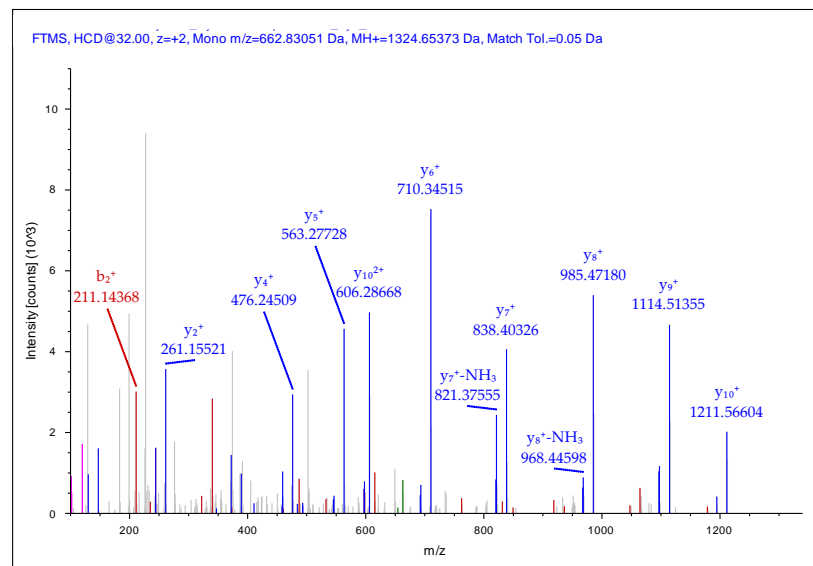

Validated

# ESYLLQPSYPAK

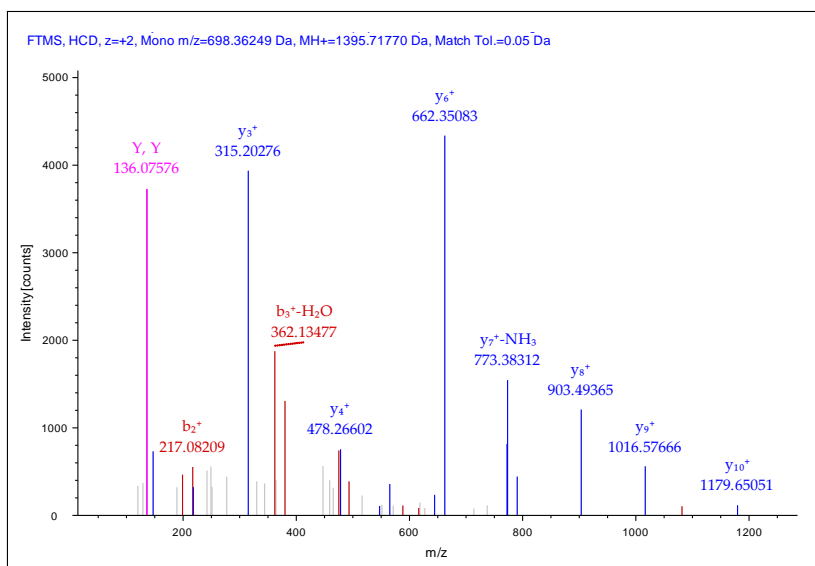

Experiment

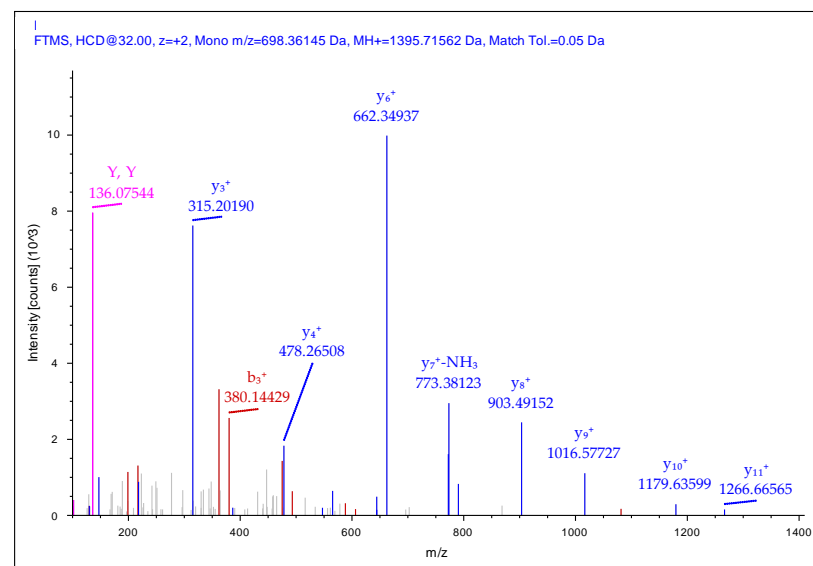

Validated

# TPEGLQESANVK

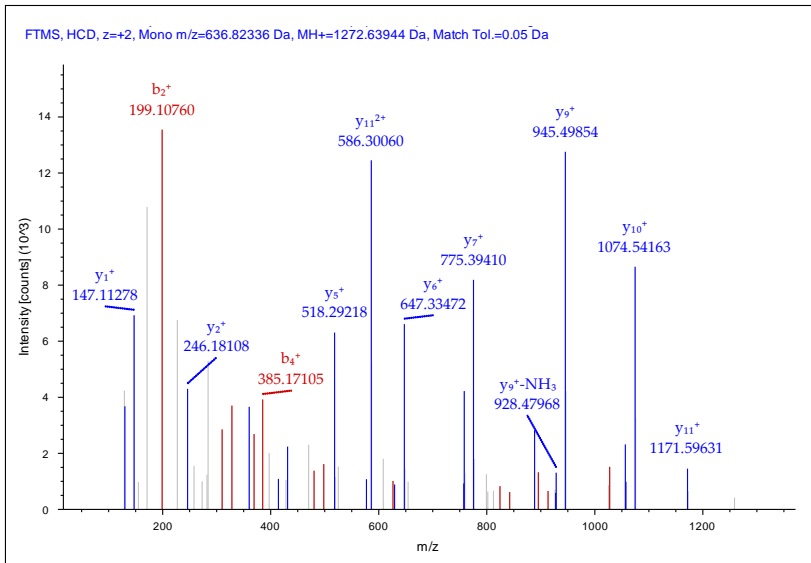

Experiment

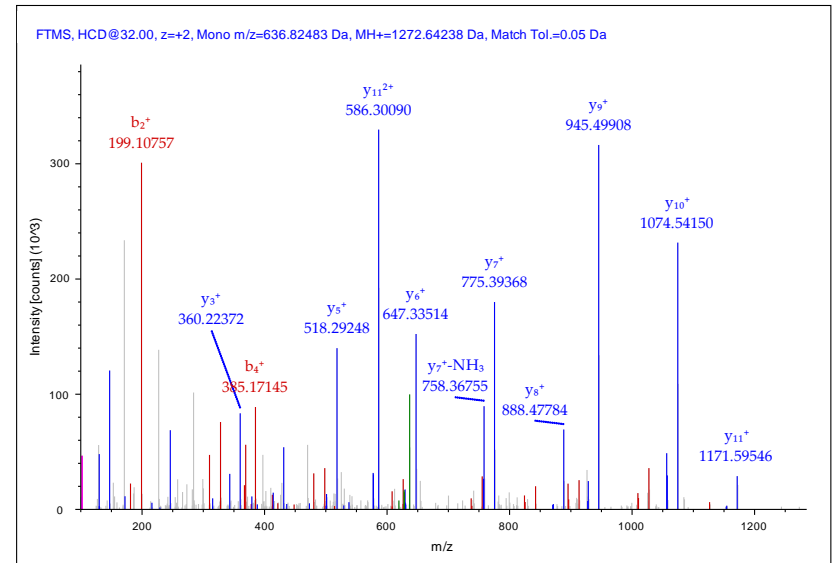

Validated

# LGQLNIGISNIK

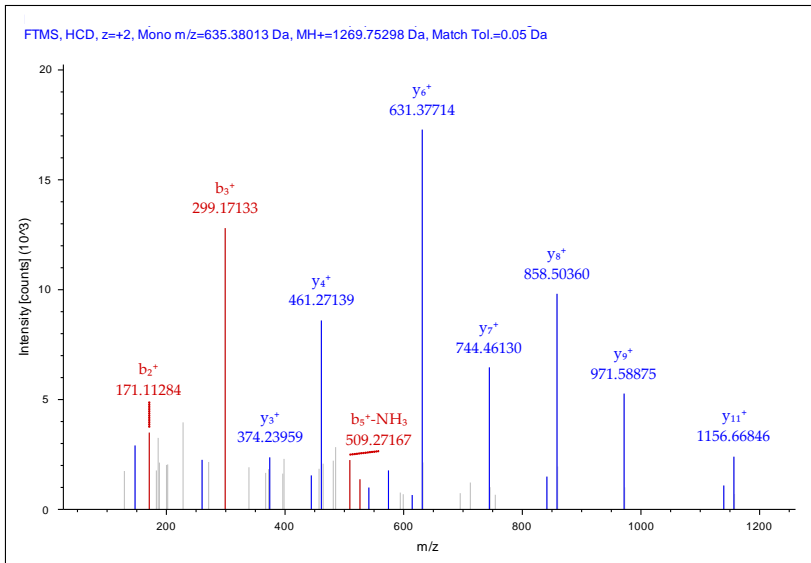

Experiment

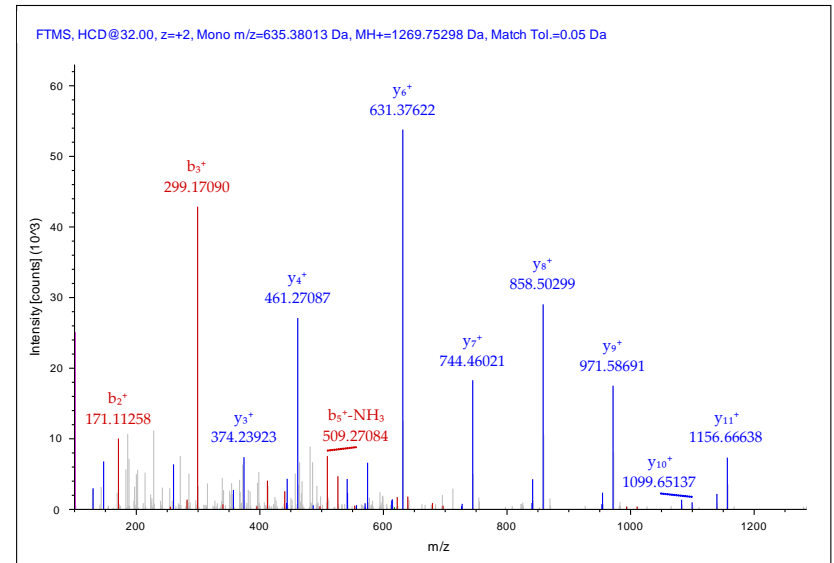

Validated

# DNTVTPGGKPNK

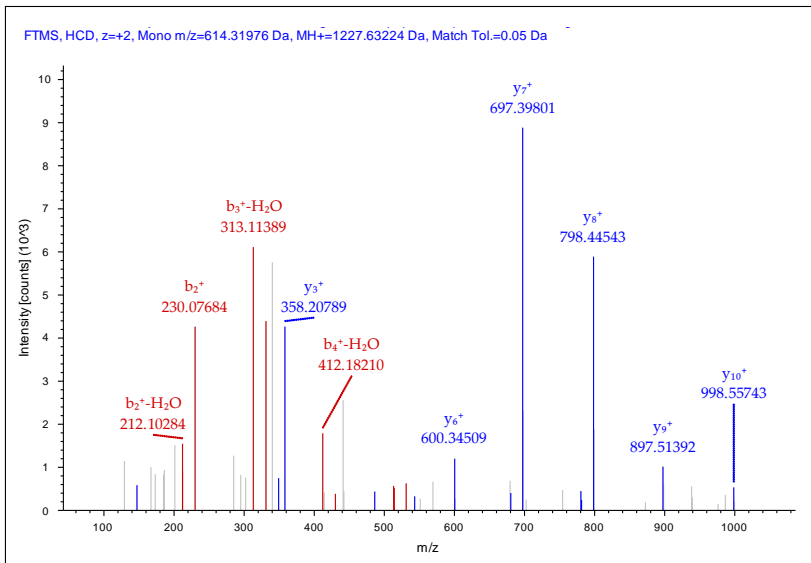

Experiment

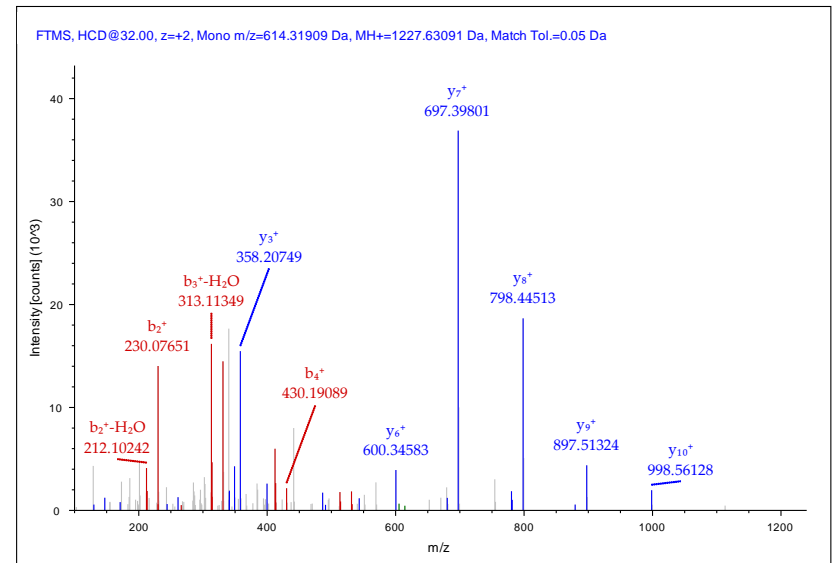

Validated

# ESVCDGQAGQK

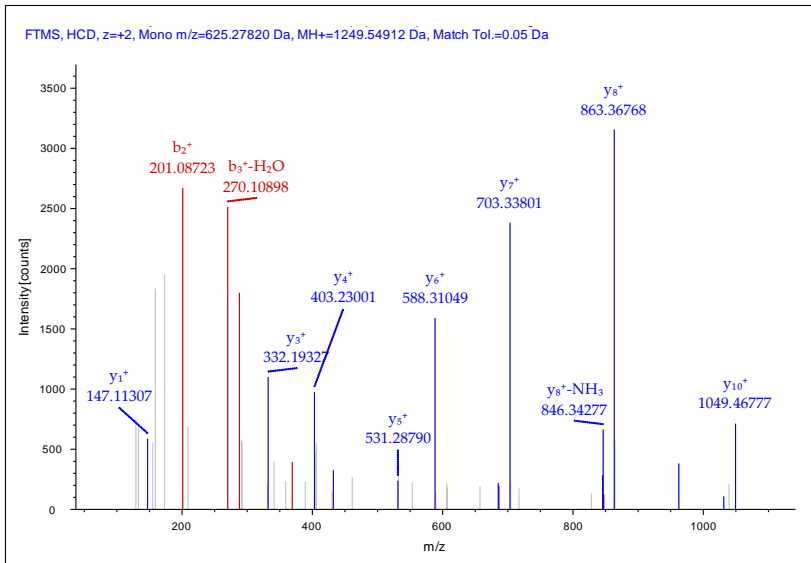

Experiment

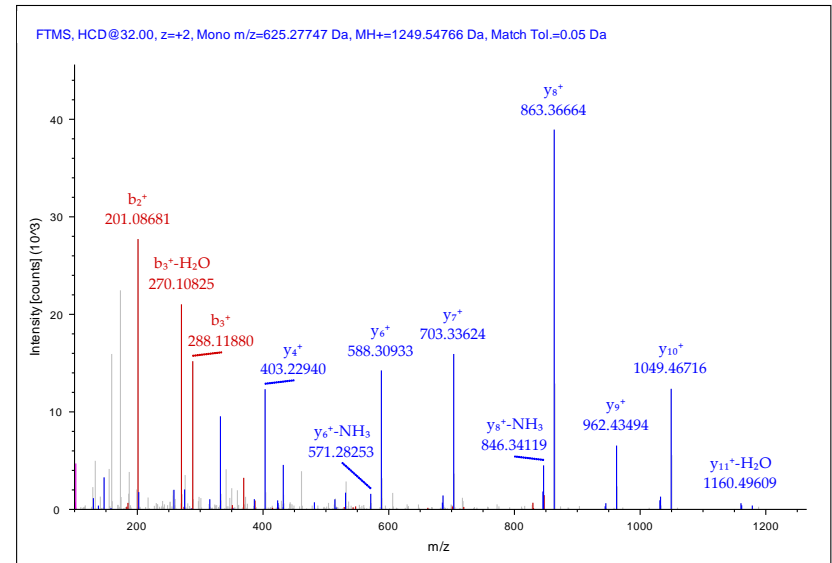

Validated



# ATGHADEHLAQTK

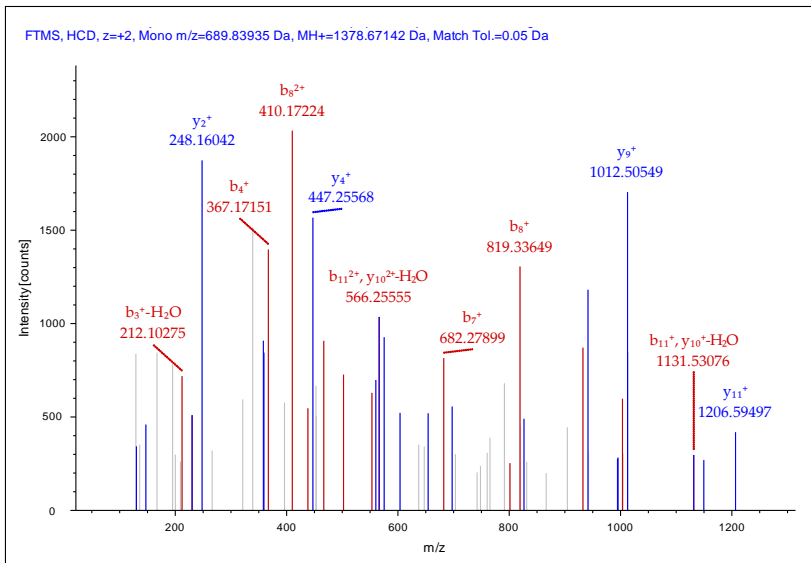

Experiment

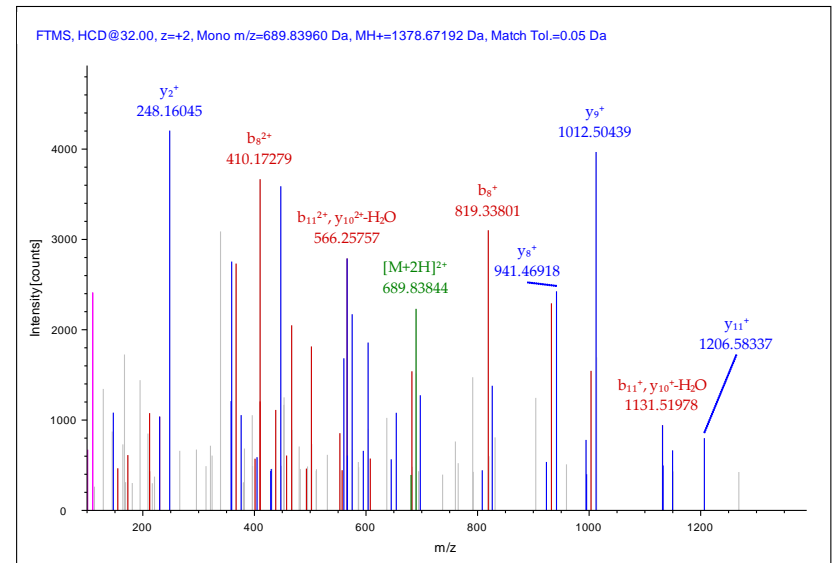

Validated

# GPDPPEPTQPGA AK

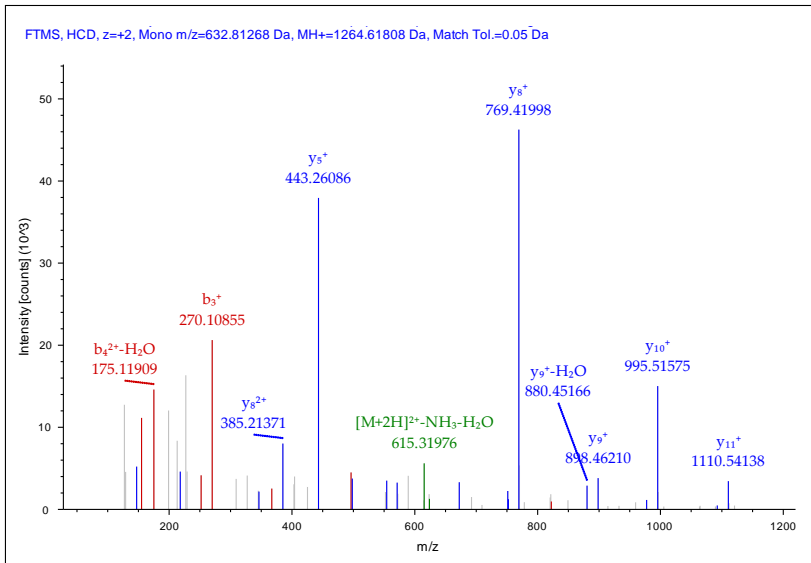

Experiment

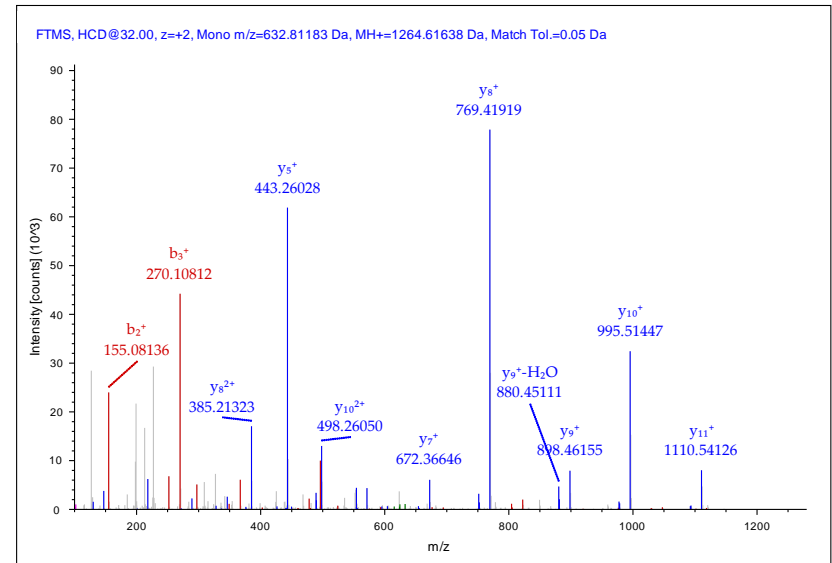

Validated

# SPAEAATALASPK

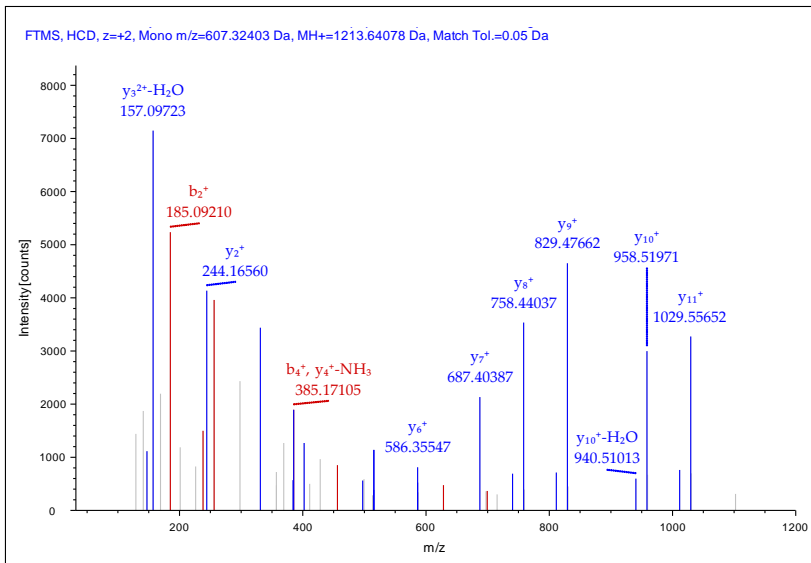

Experiment

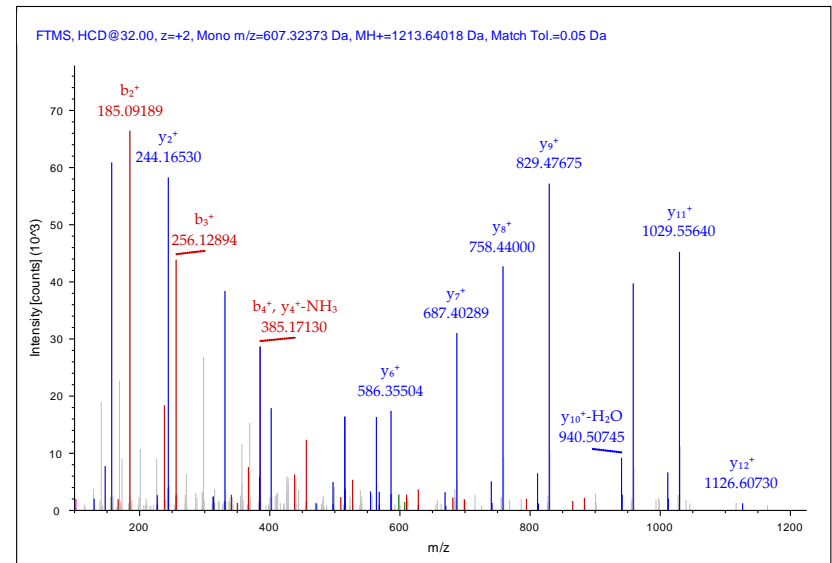

Validated

# GTPTLPATTPSSK

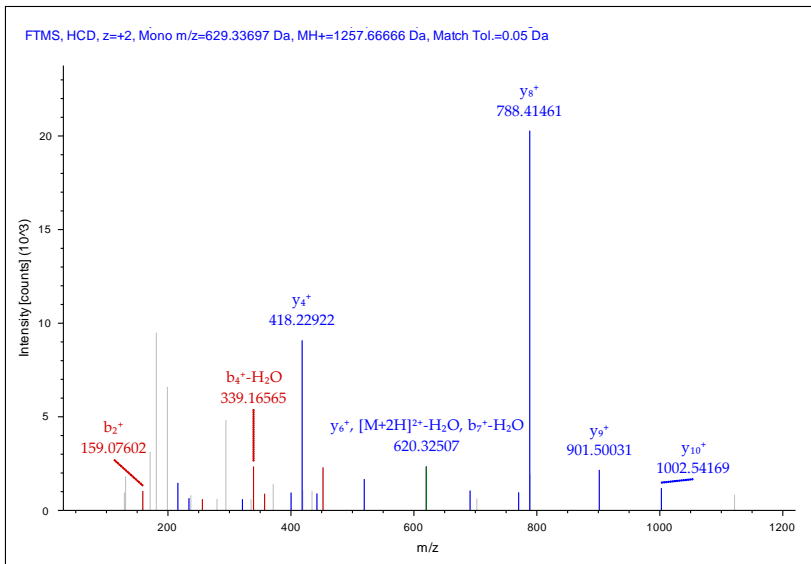

Experiment

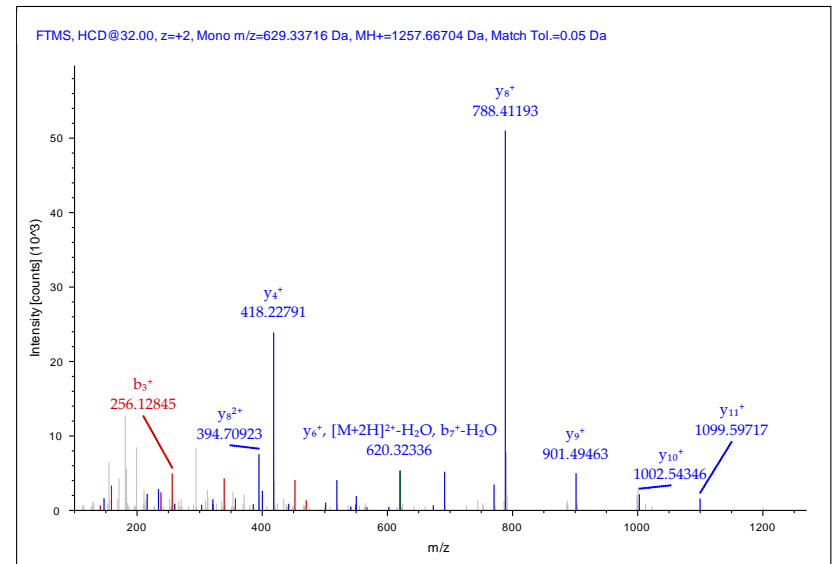

Validated

# DEEKMEIQELQLK

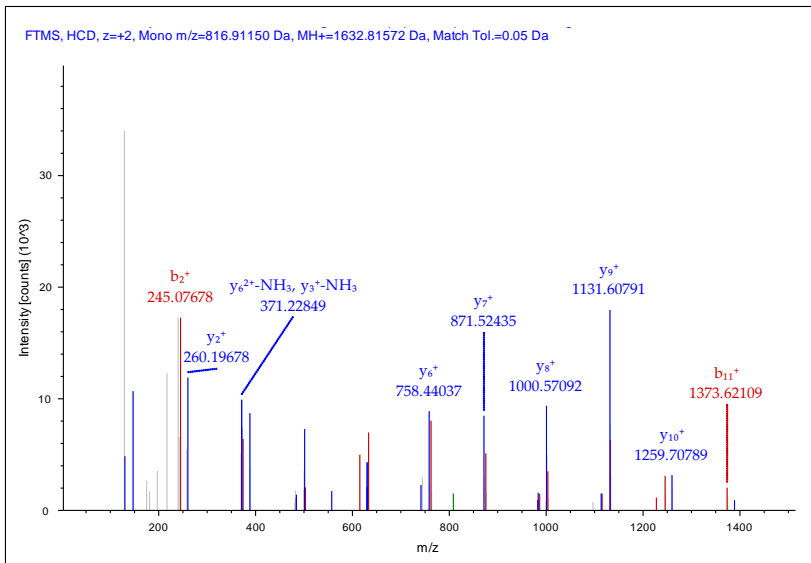

Experiment

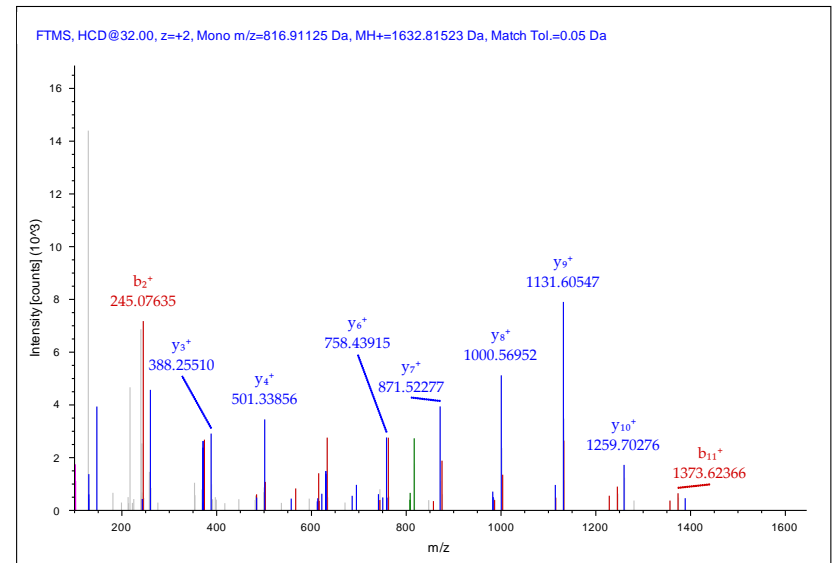

Validated

# KLGEMWNDTAADDK

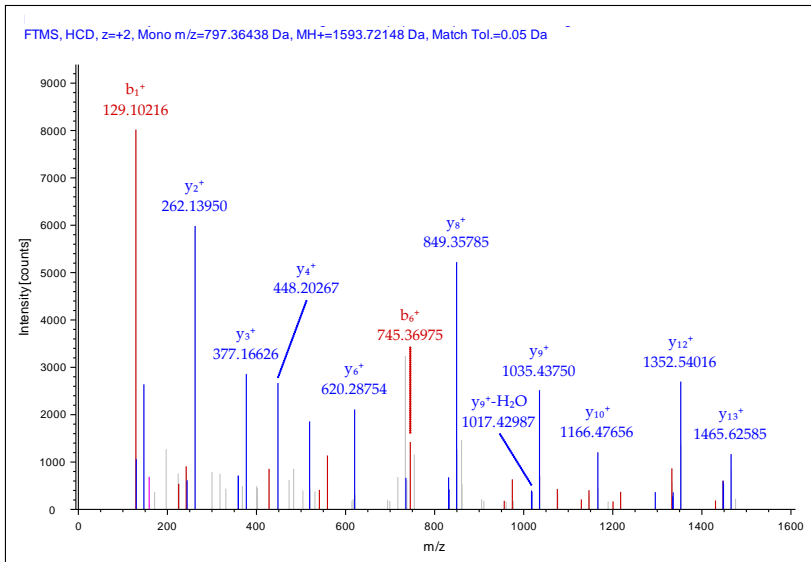

Experiment

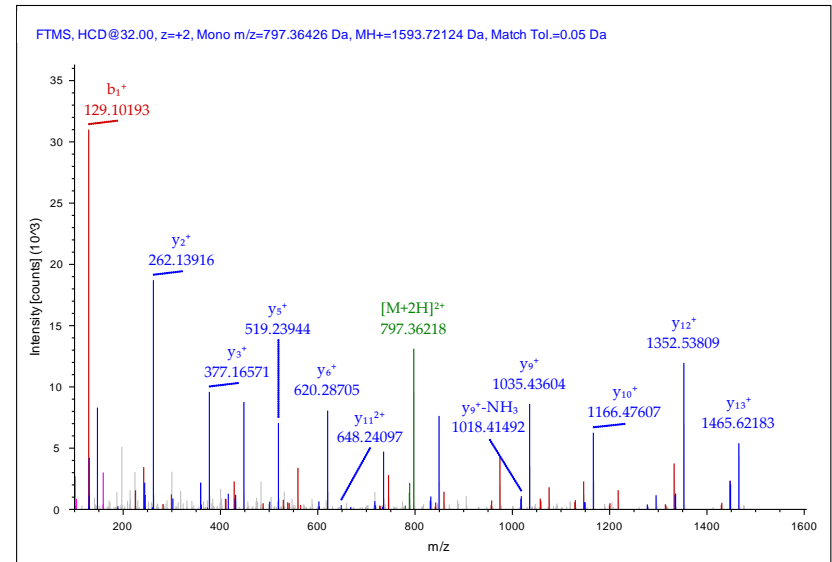

Validated

# EDAAQGIANEADK

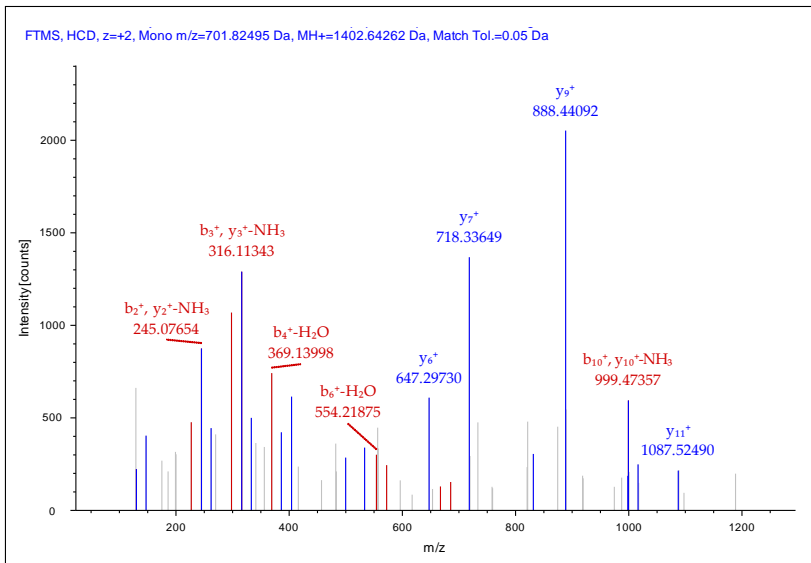

Experiment

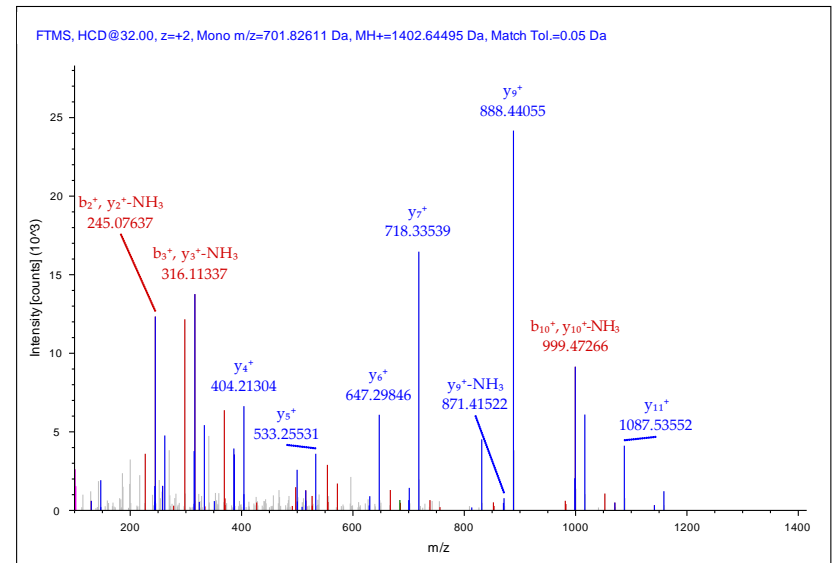

Validated

# TSDIEANQPLETNK

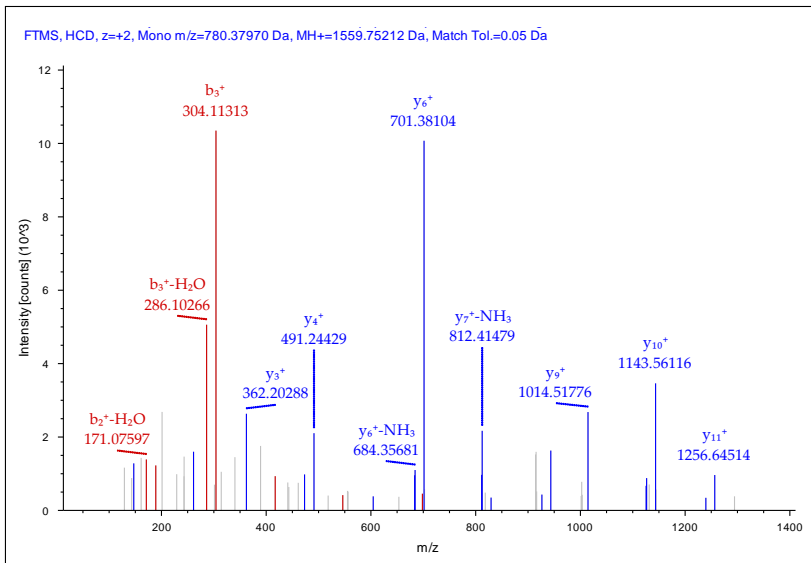

Experiment

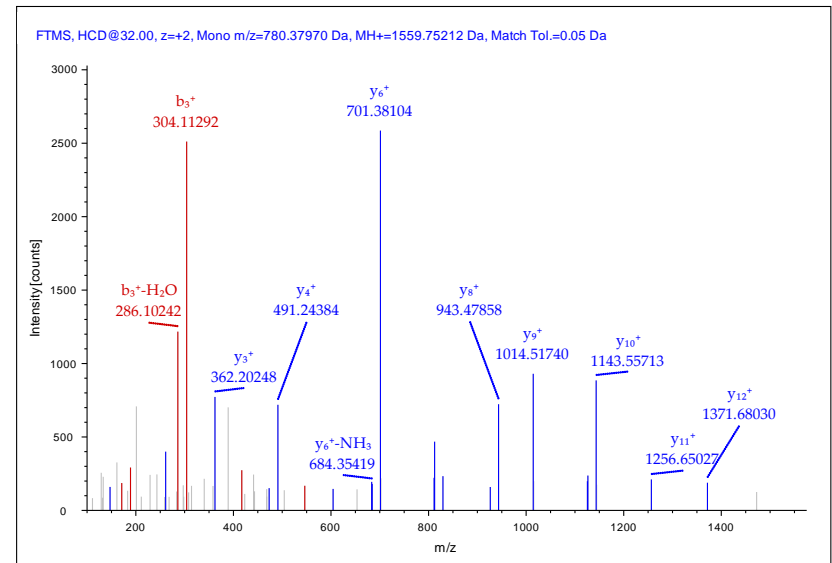

Validated



# GPSTNPDSEWEGPK

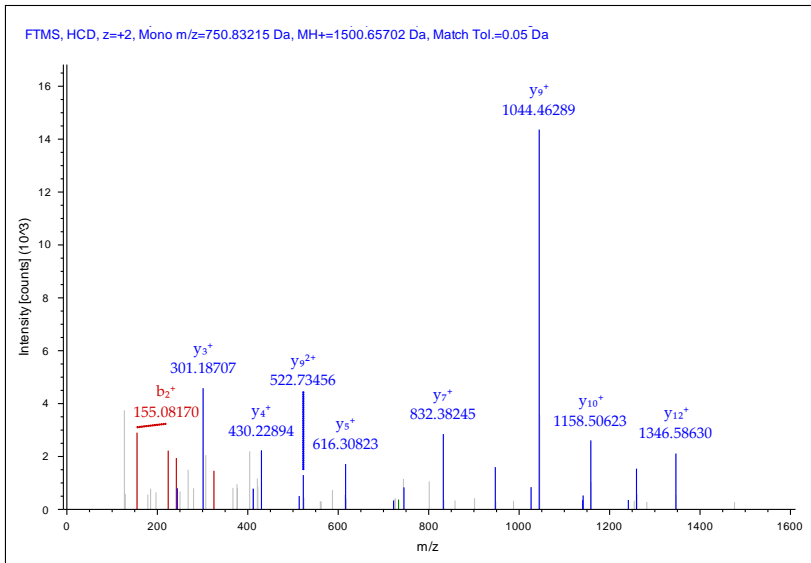

Experiment

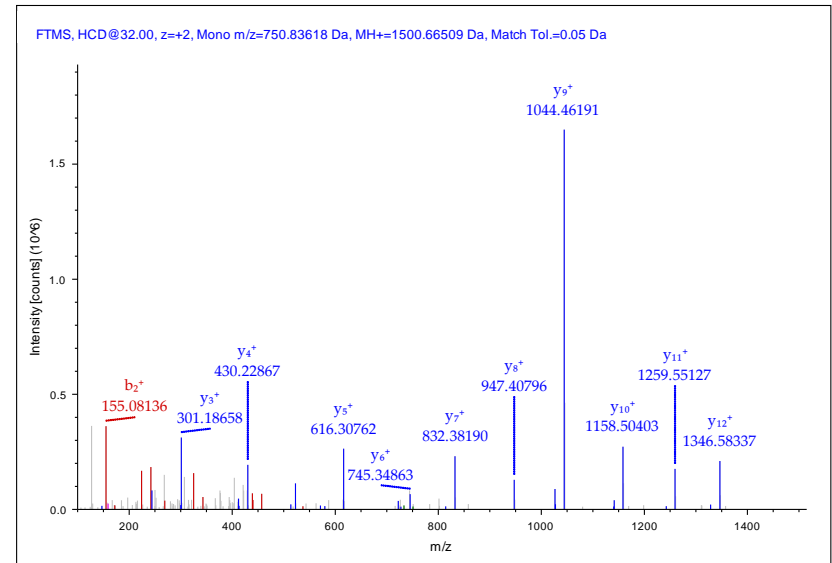

Validated

# EASSPPAVTPSTYK

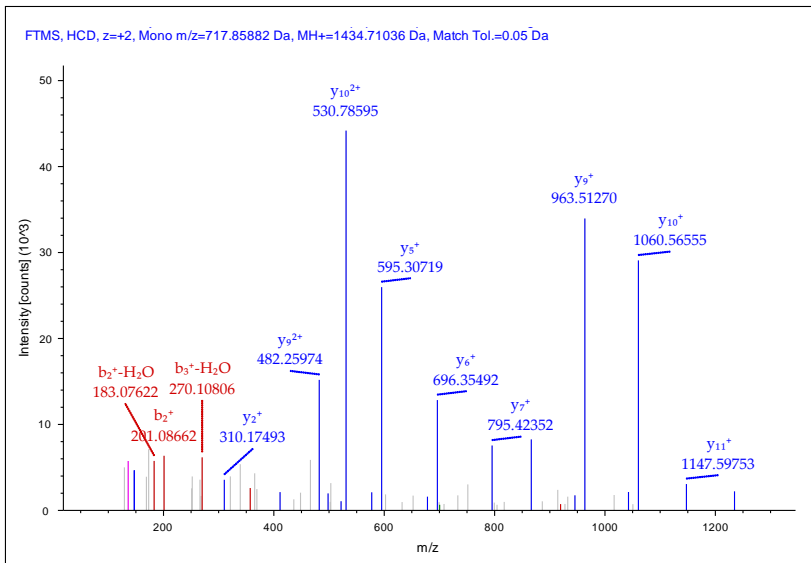

Experiment

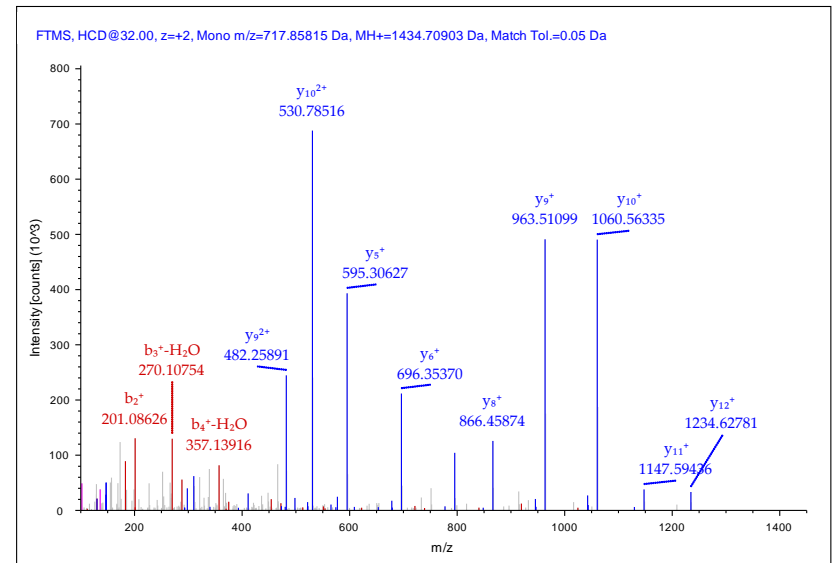

Validated

# GDPTSPAVIPLSPK

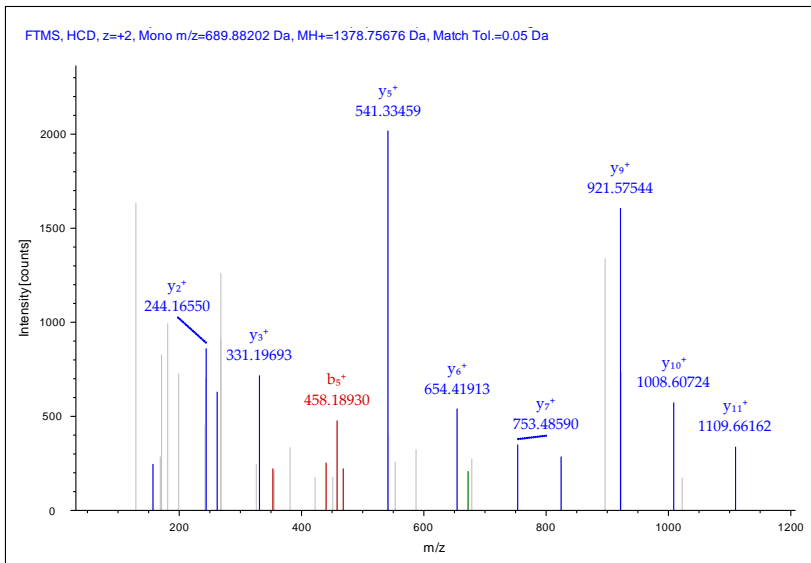

Experiment

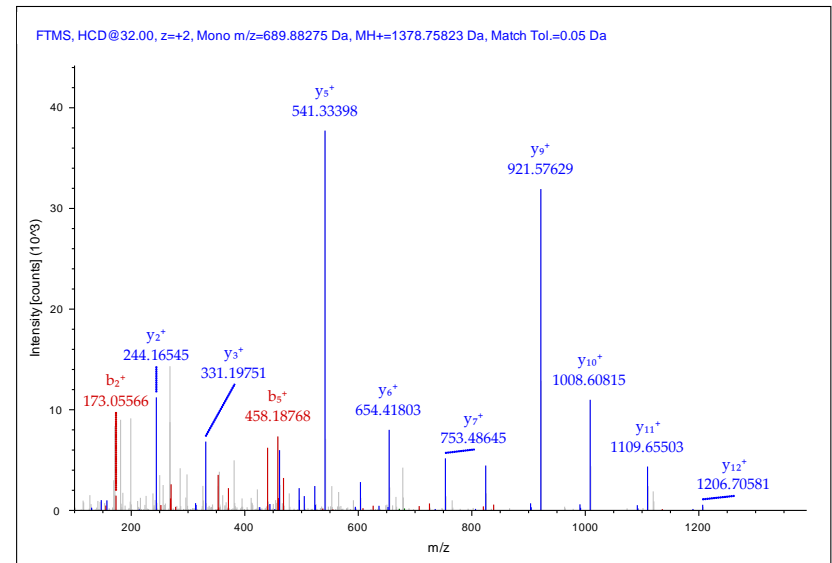

Validated

# LTFDSSFSFSPNTGGK

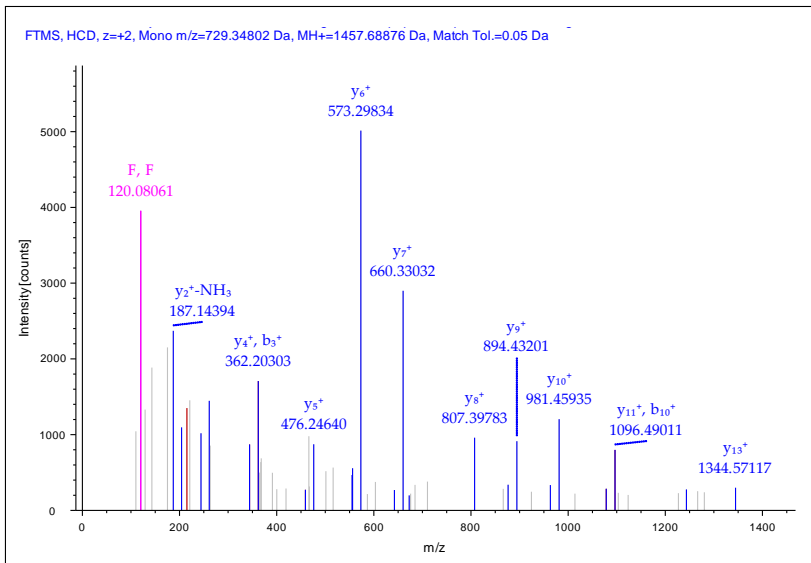

Experiment

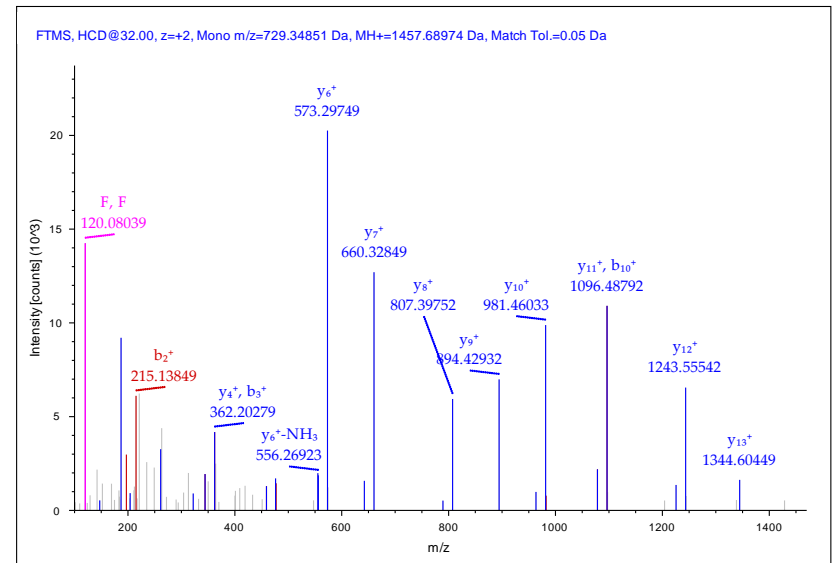

Validated

# DHAVVVGVYRPLPK

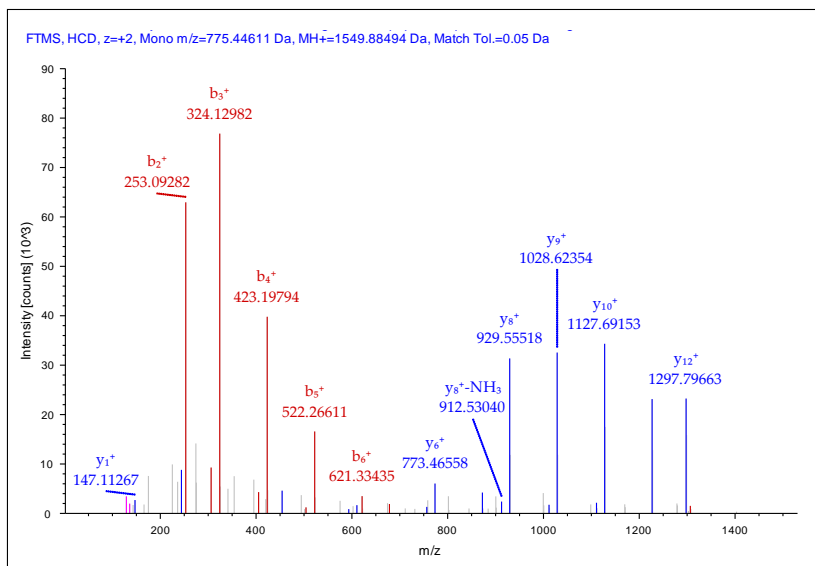

Experiment

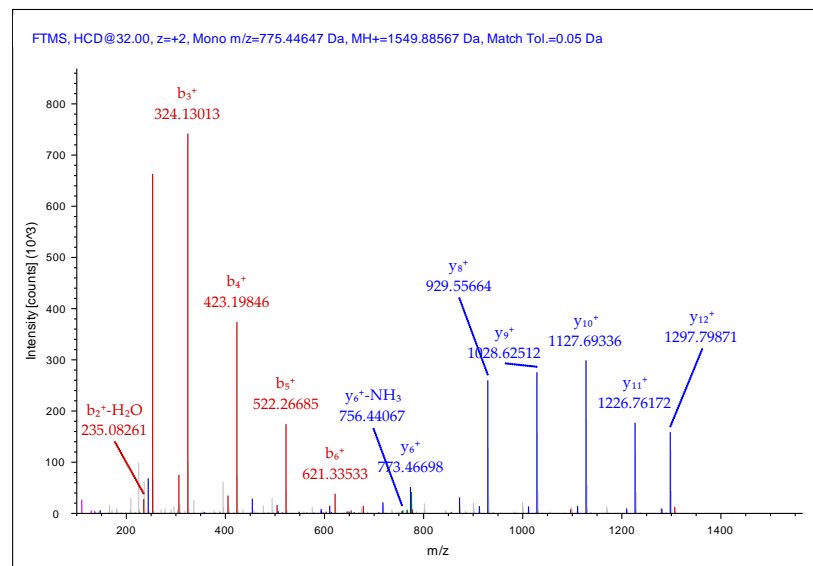

Validated

# NVSSNPCHEAVGIK

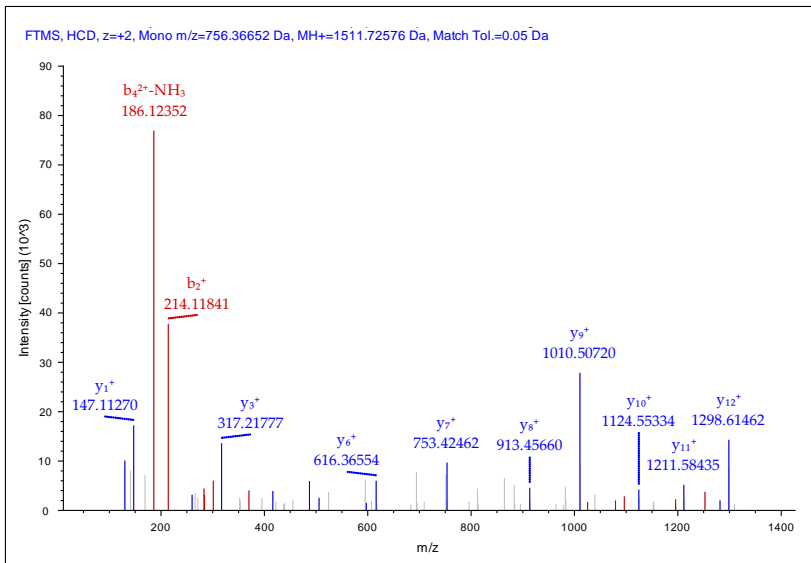

Experiment

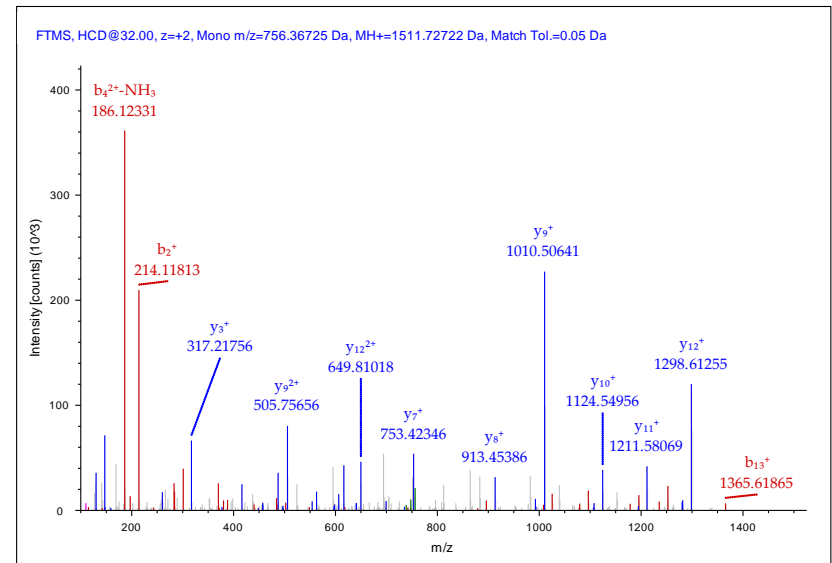

Validated

# HGLDVALPTAGPVAK

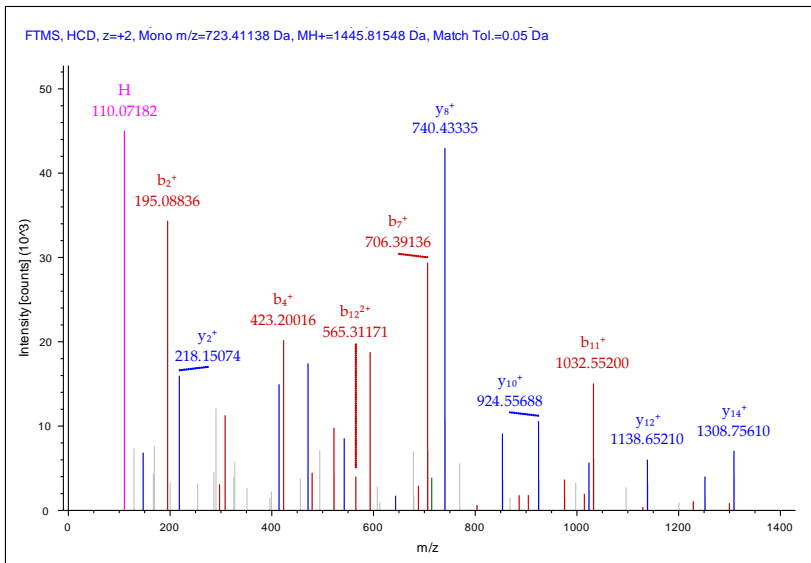

Experiment

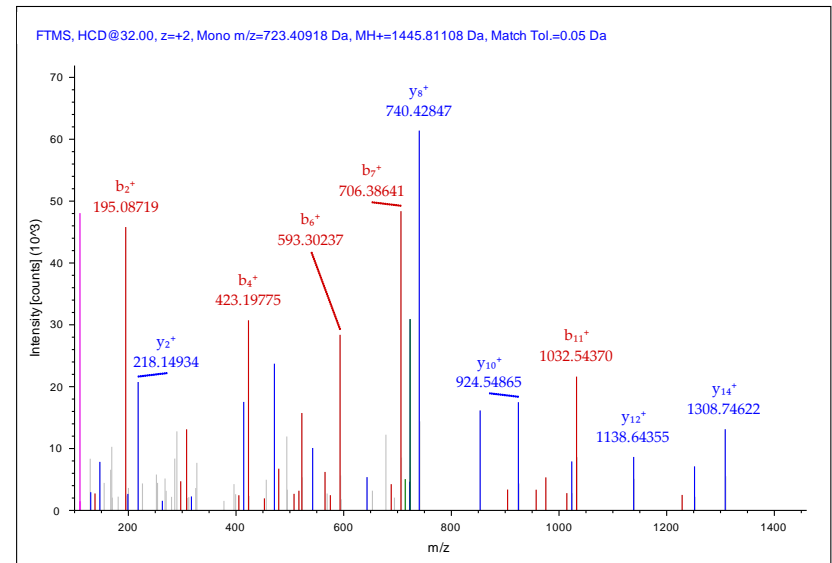

Validated

# DSPATTHSPTPPSPK

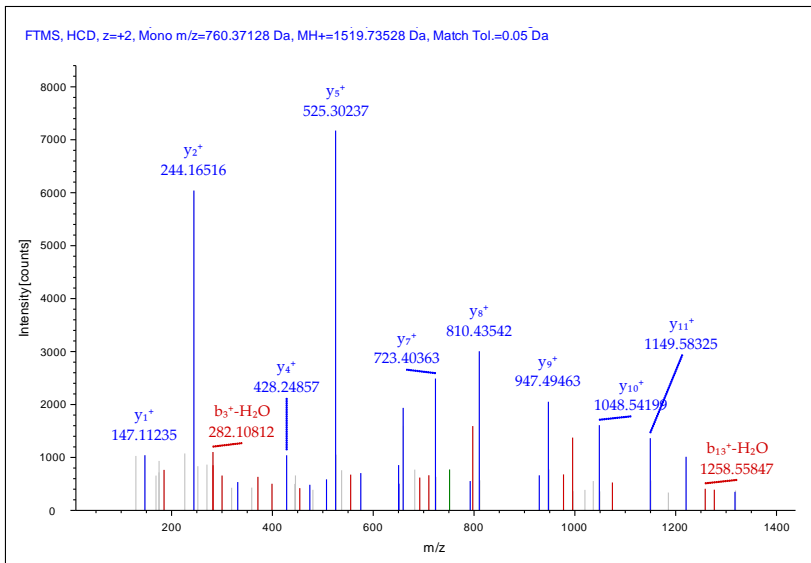

Experiment

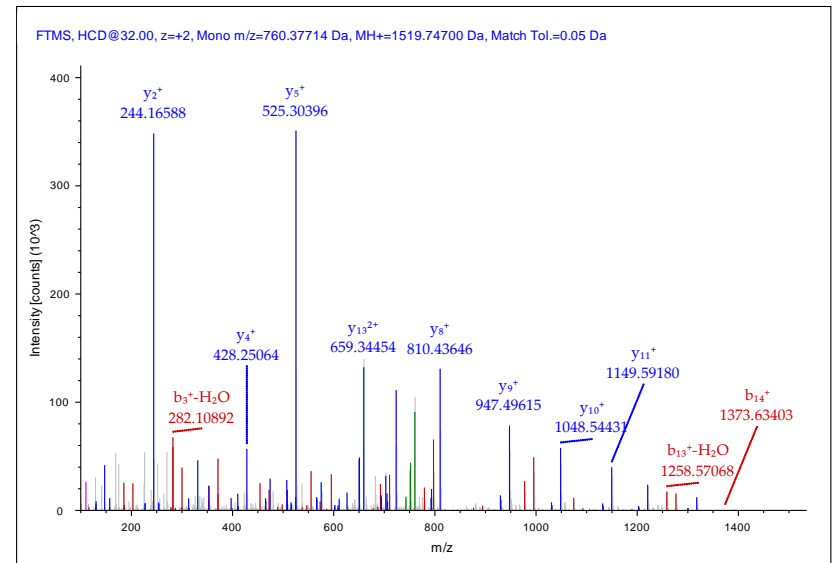

Validated



# NIQDVLAQNLSGGQK

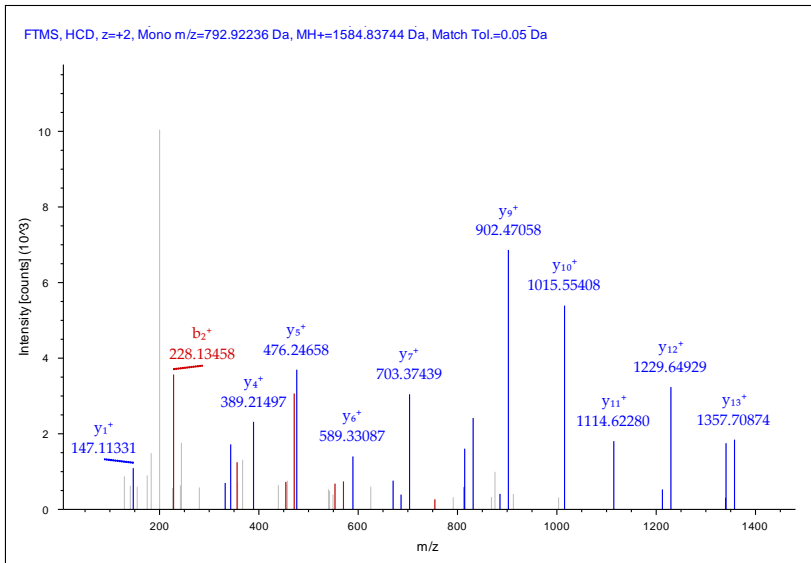

Experiment

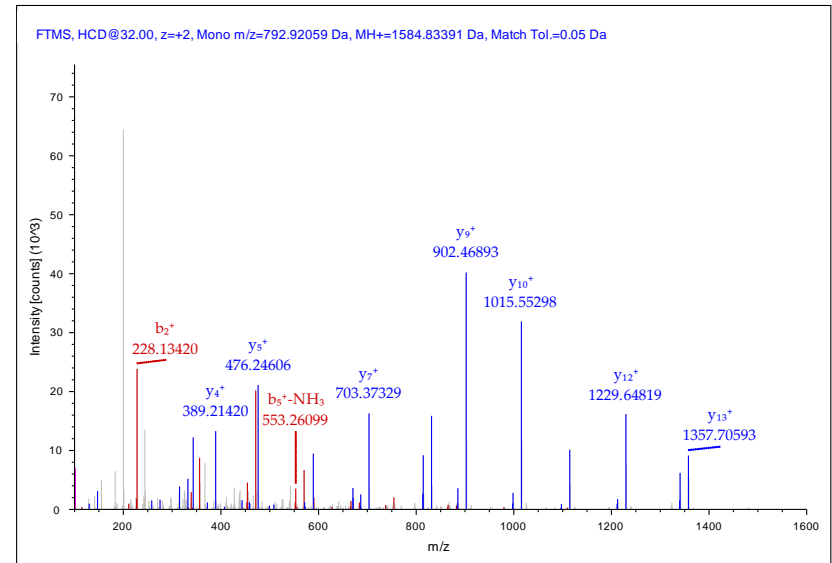

Validated

# TGLFTPDLAFEATVK

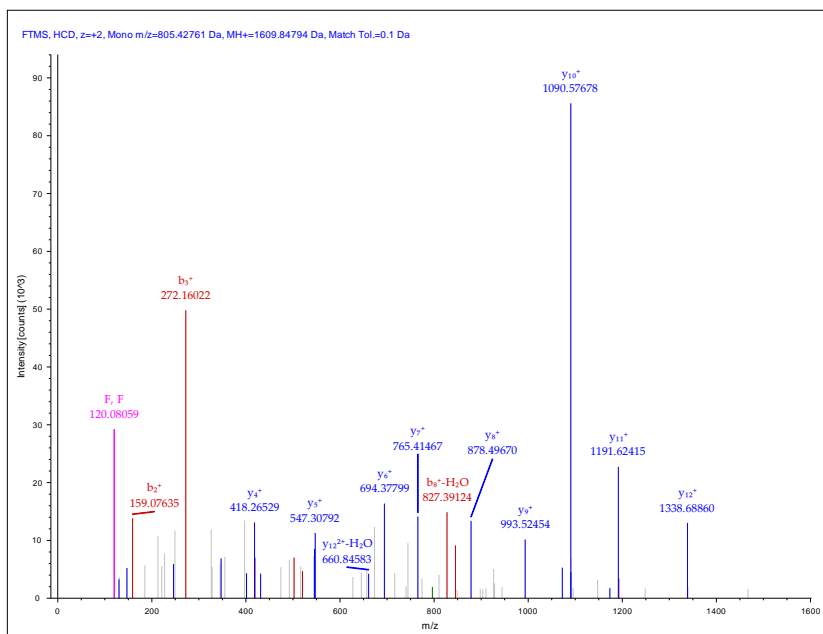

Experiment

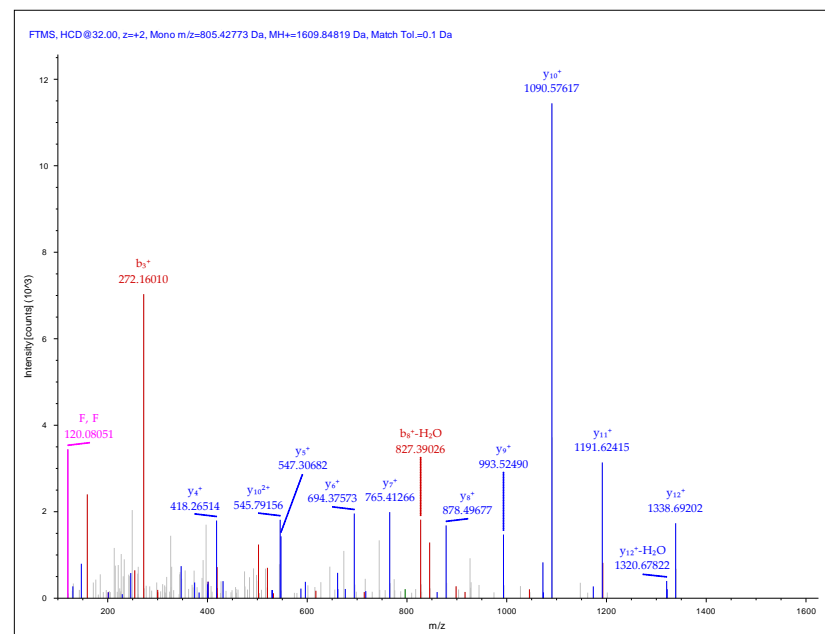

Validated

# NVSSNPCHEAVGIKK

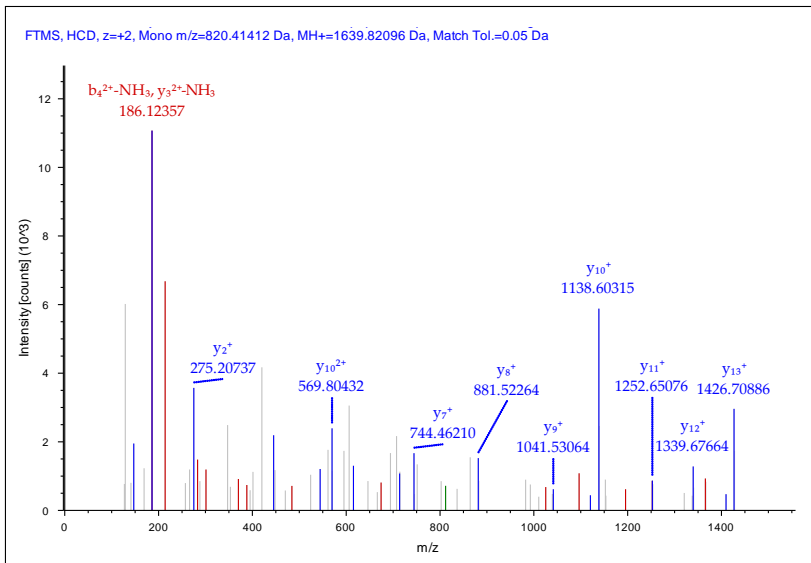

Experiment

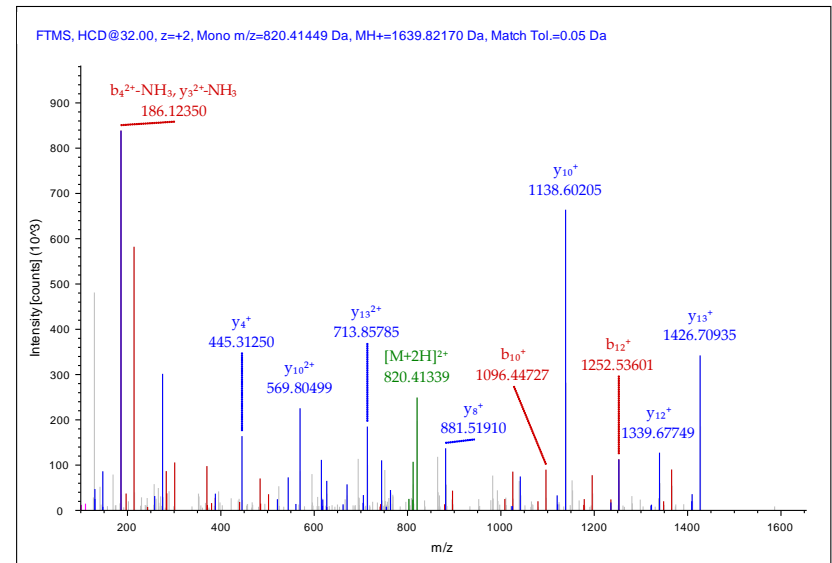

Validated

# GPLSTVAPAPLLPVQK

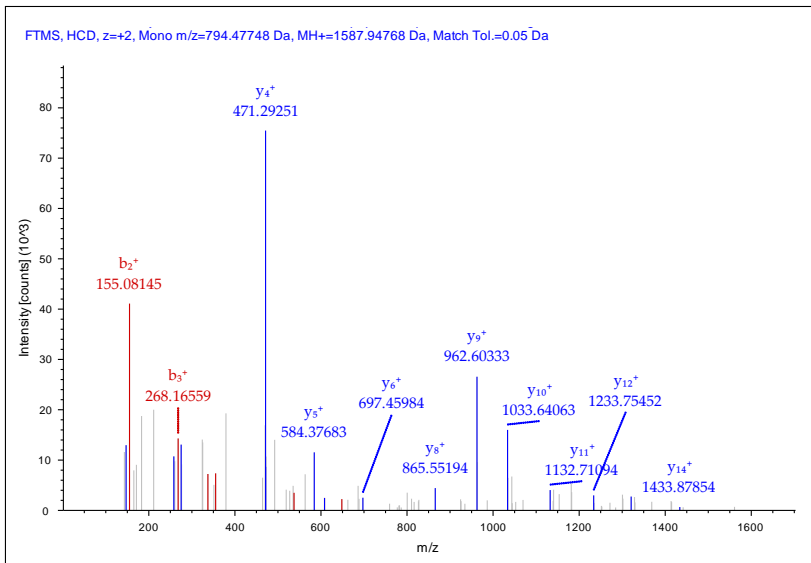

Experiment

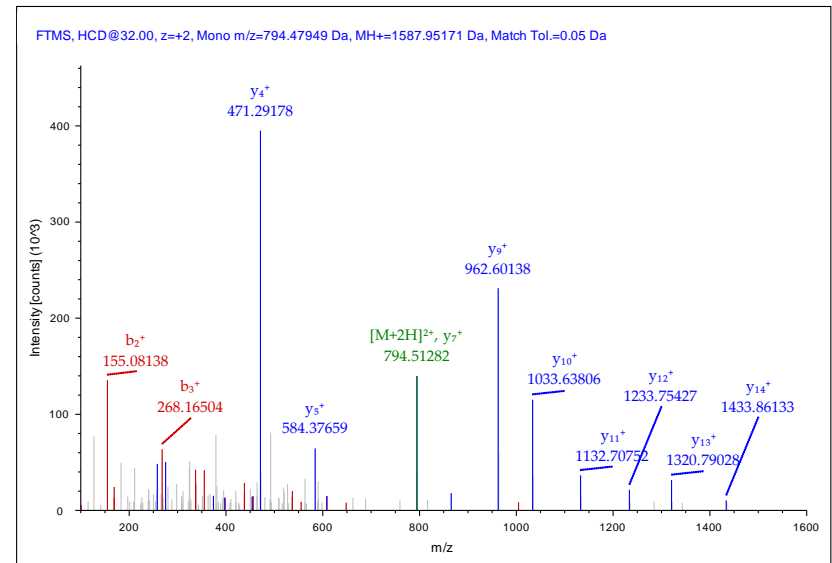

Validated

# AIESGILDRDLANNLK

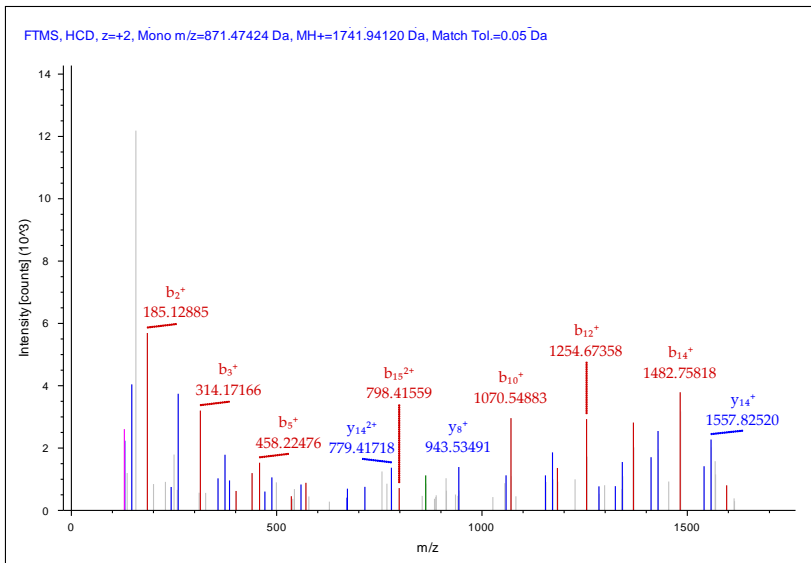

Experiment

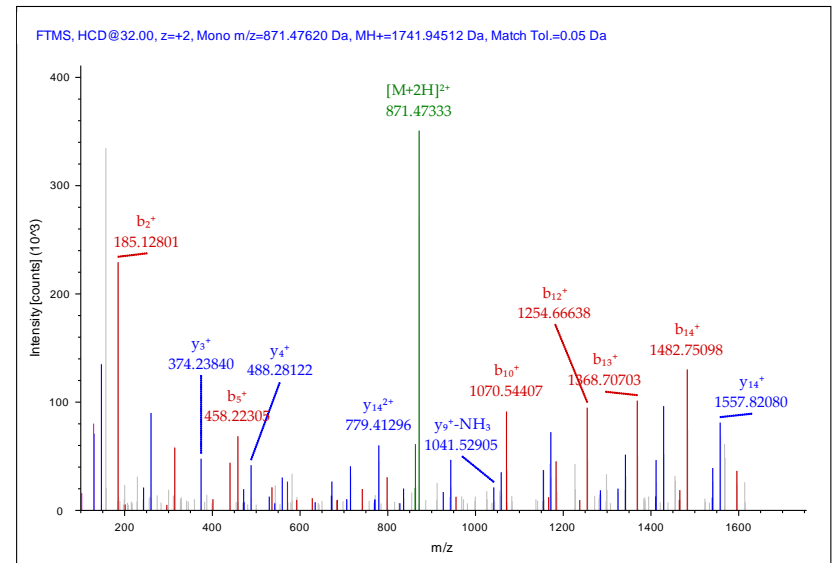

Validated

# DSMSAAEVGTGQYATTK

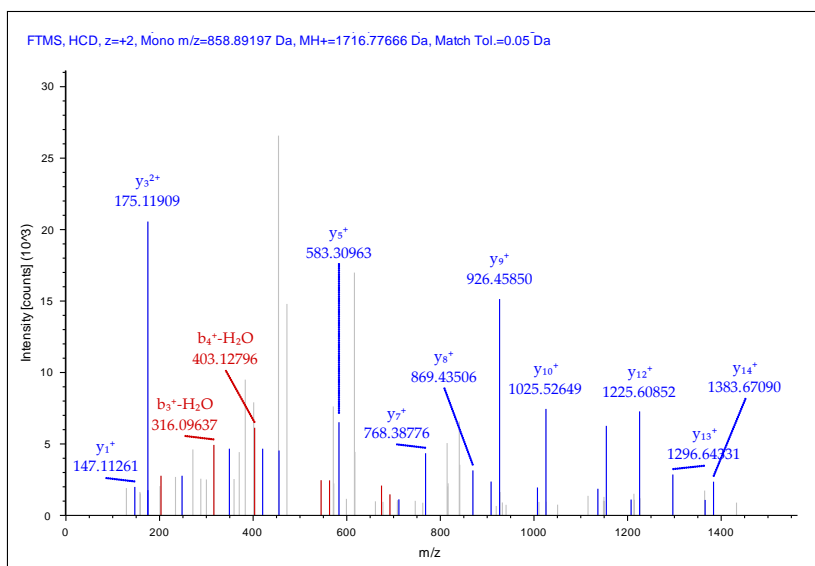

Experiment

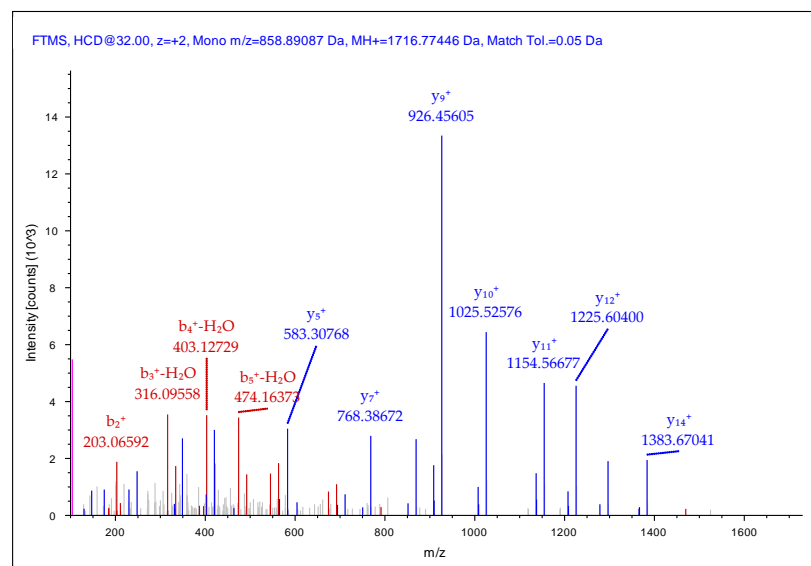

Validated

# SEAASVSTTNPSQGEDFK

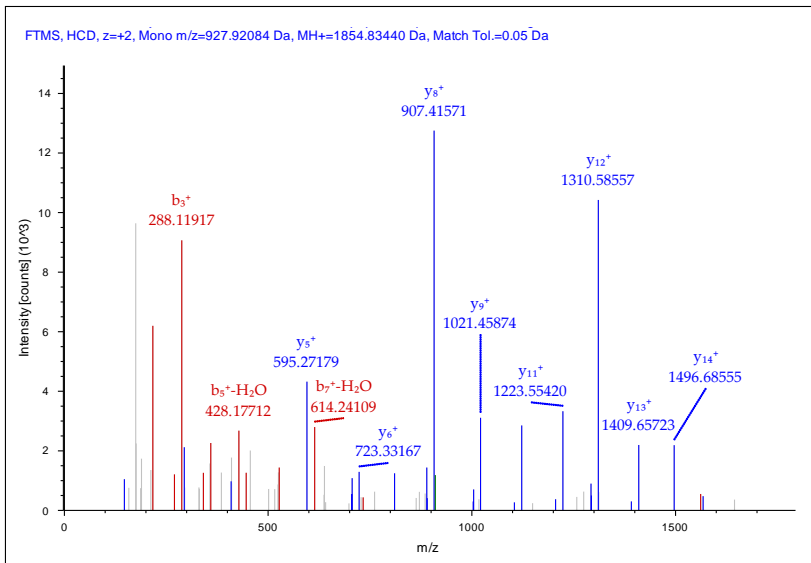

Experiment

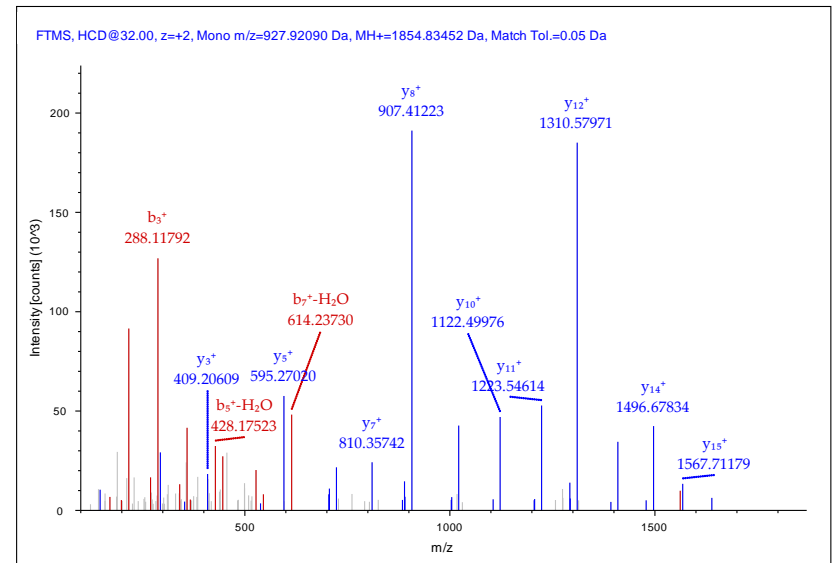

Validated

# DLVPEPGAAAGLEVFTQK

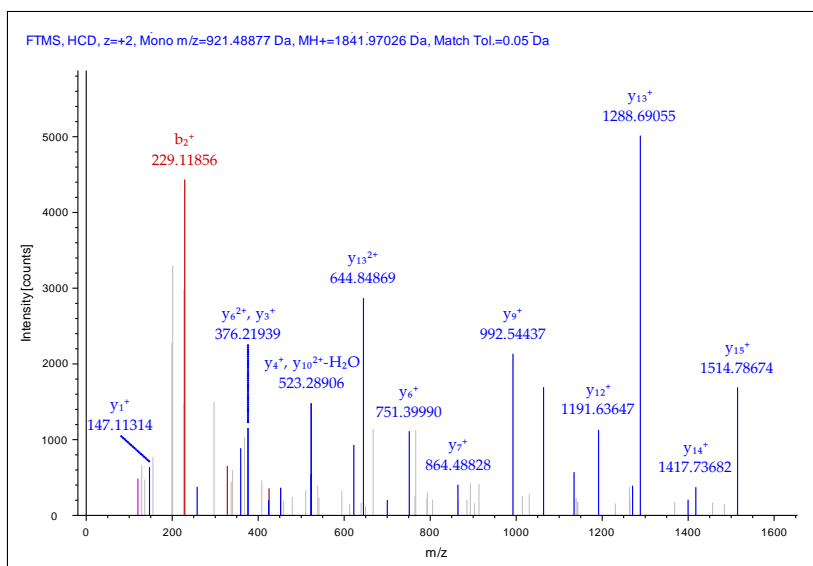

Experiment

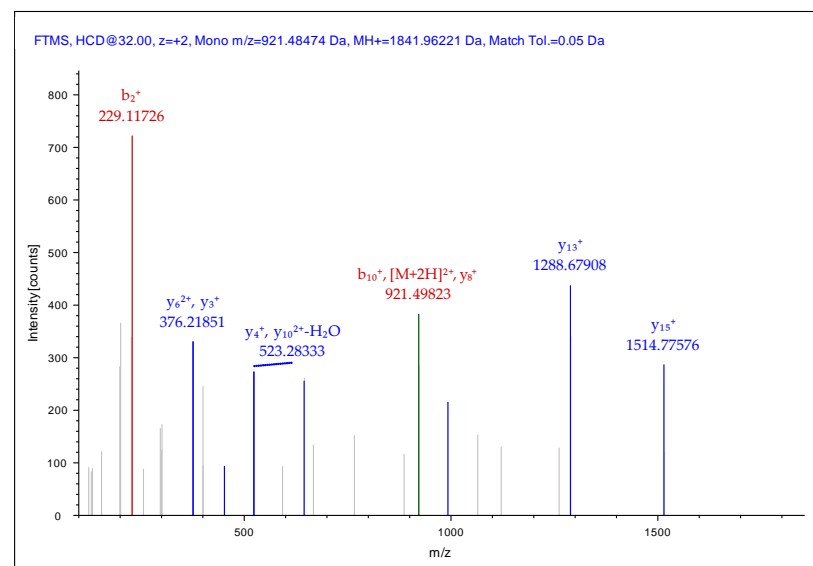

Validated



# HQGVTVGMGQK

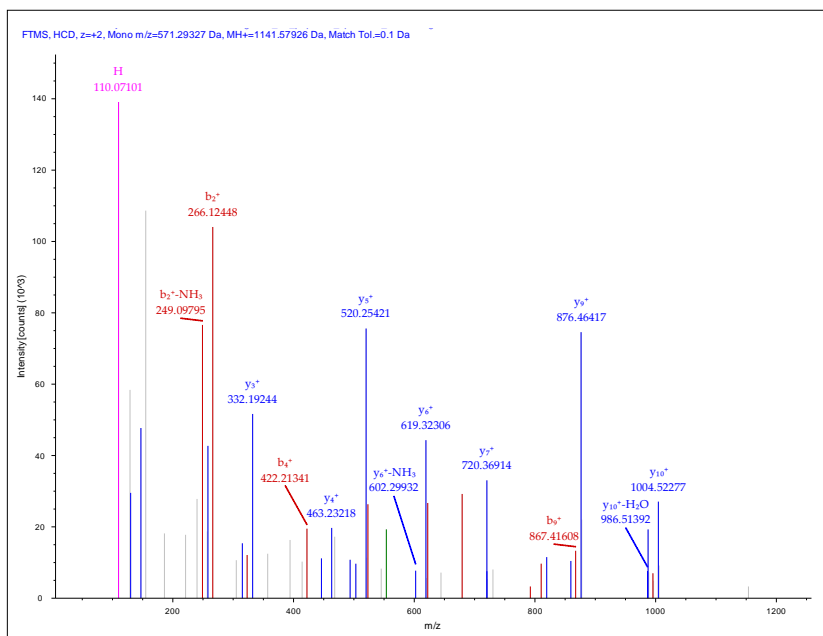

Experiment

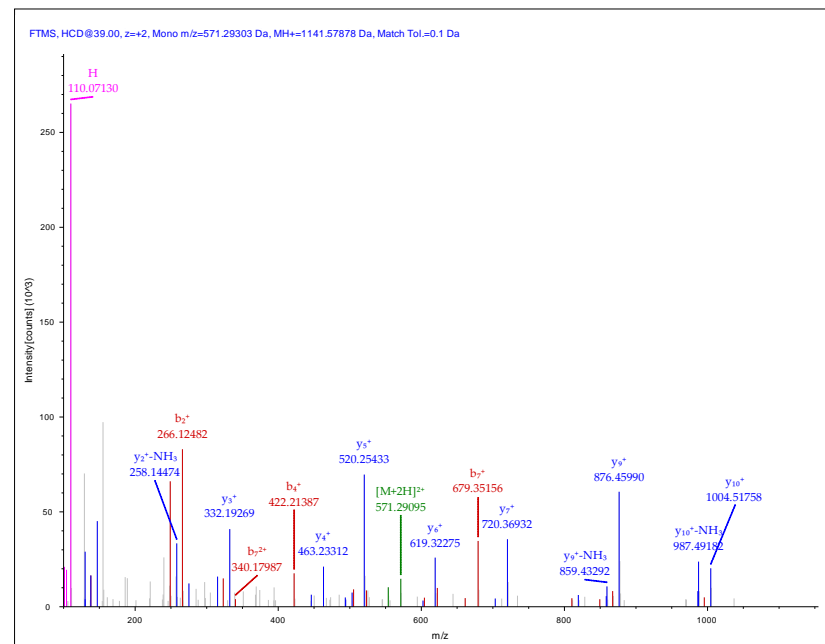

Validated

# CVVAMPEVSSK

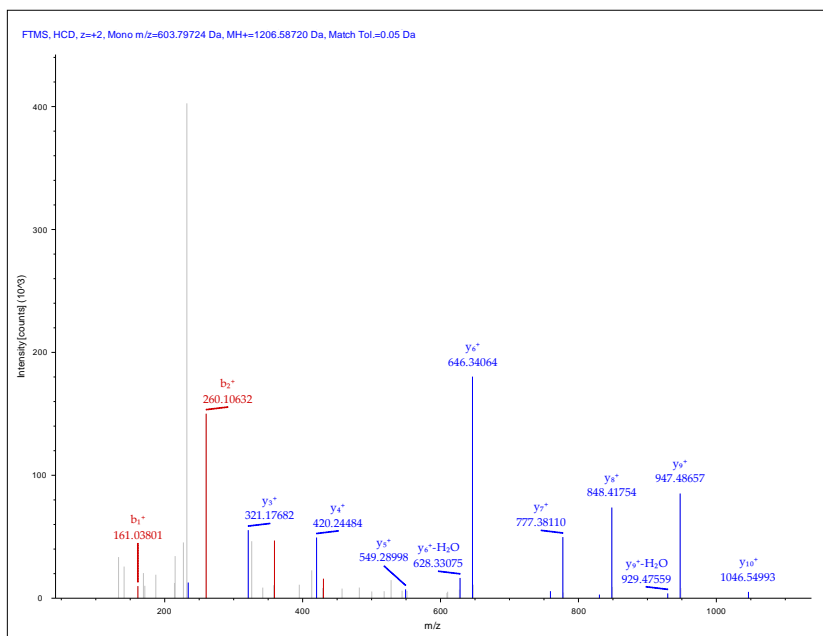

Experiment

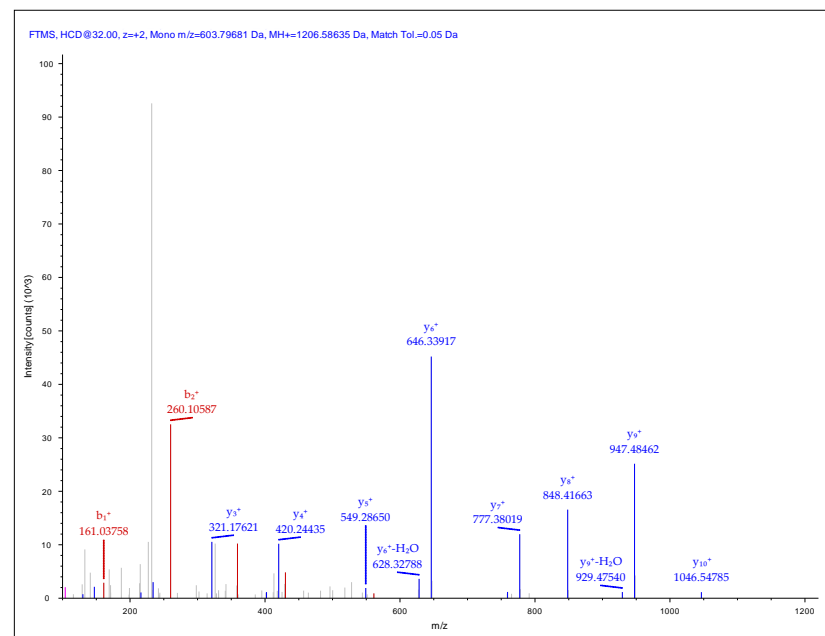

Validated

# KADSVANQGTK

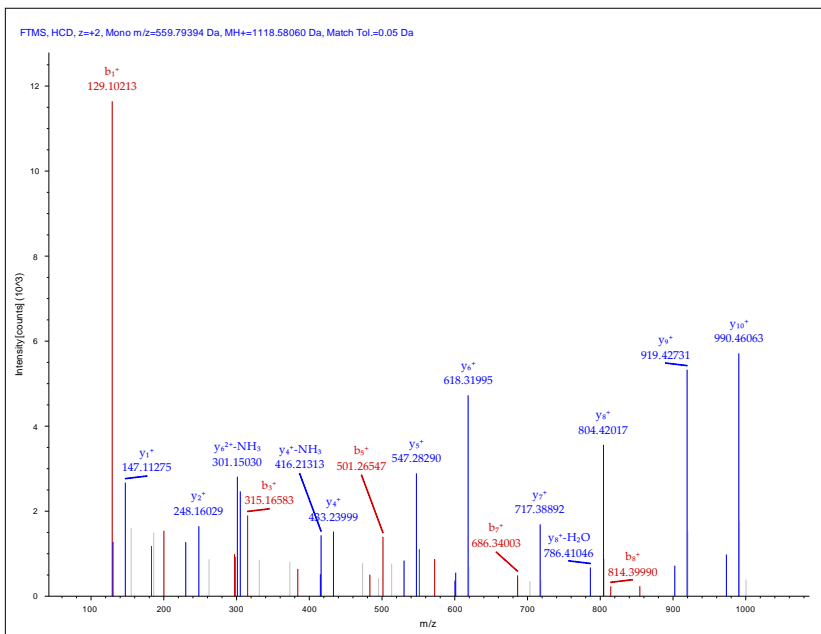

Experiment

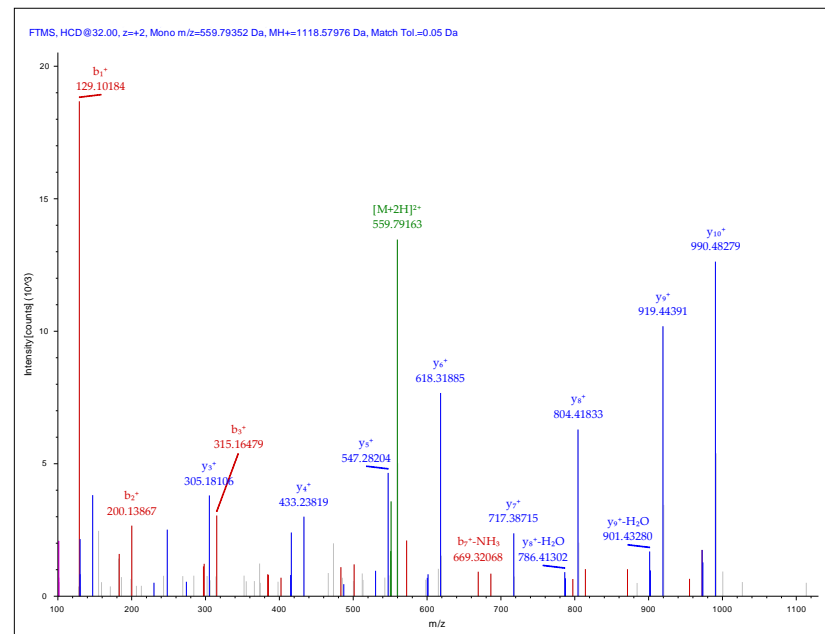

Validated

# NDDIPEQDSLGLSNLQK

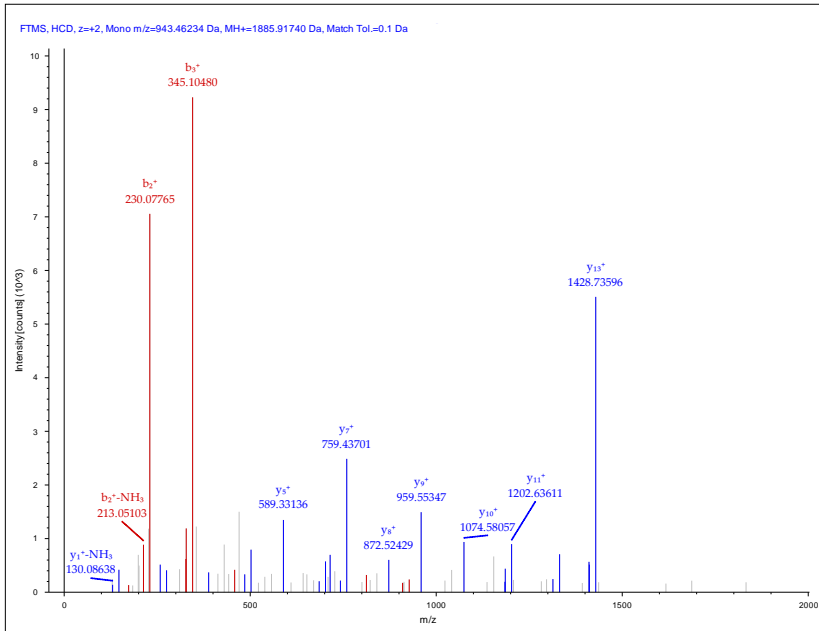

Experiment

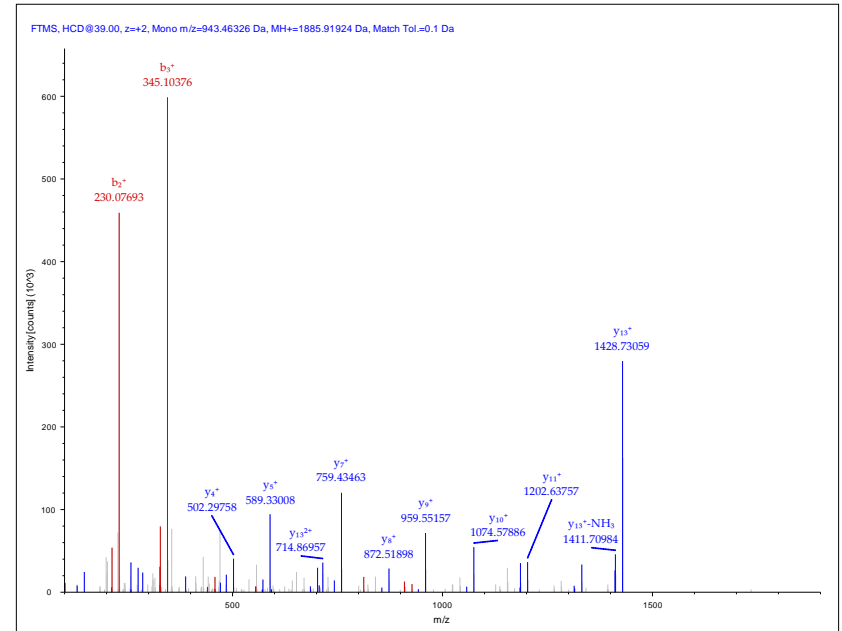

Validated

# DEEKMELQELQLK

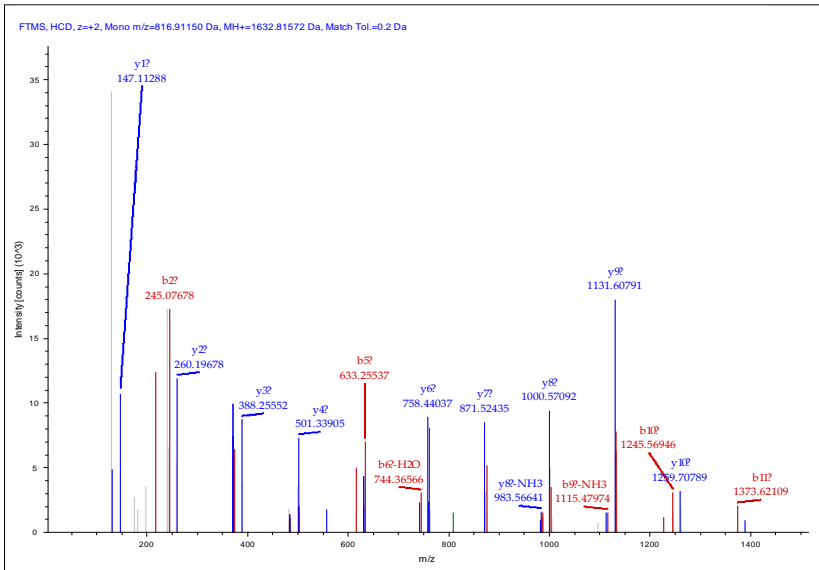

Experiment

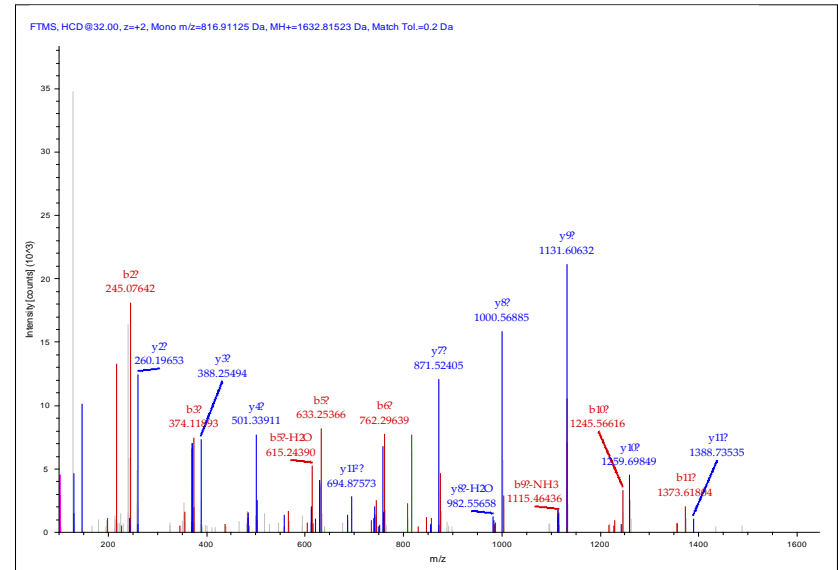

Validated

# ADSVANQGTKVEGITNQGK

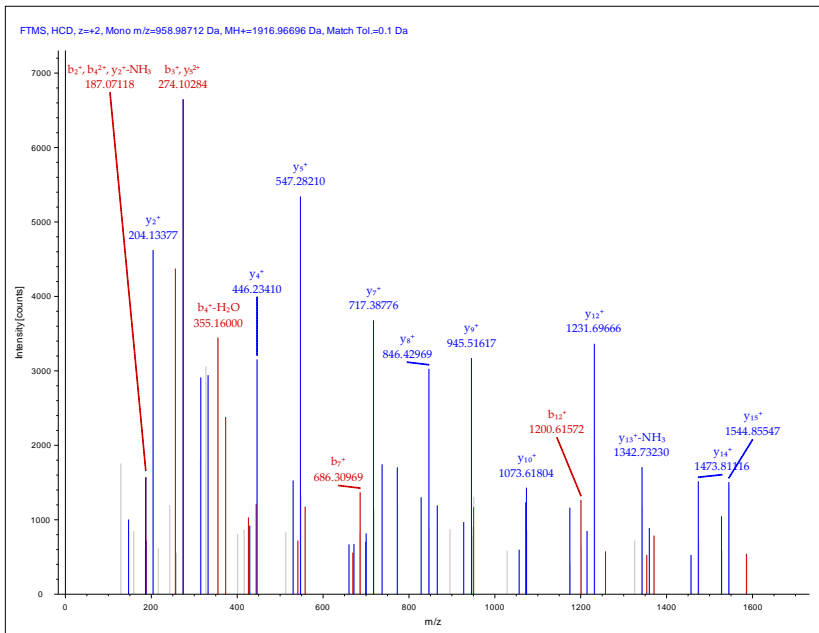

Experiment

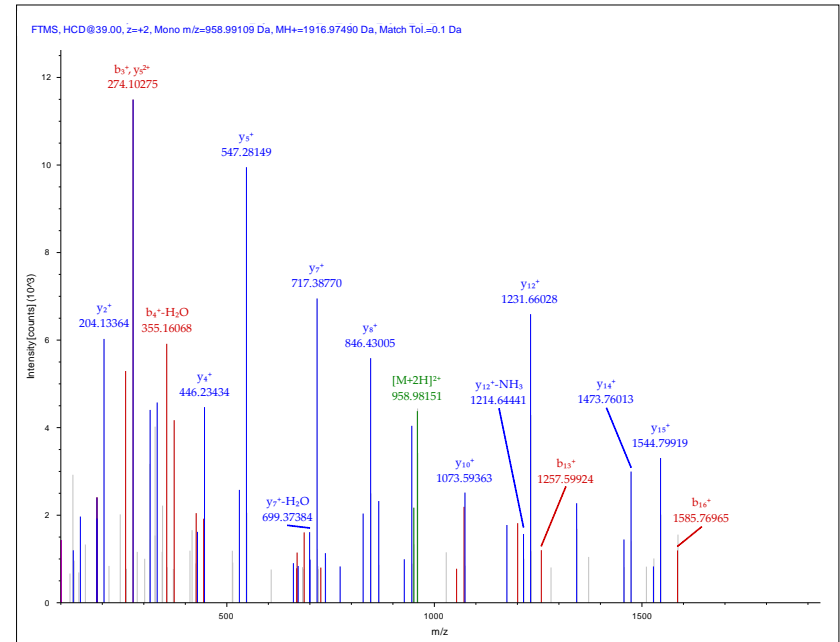

Validated

# KADSVANQGTKVEGITNQGK

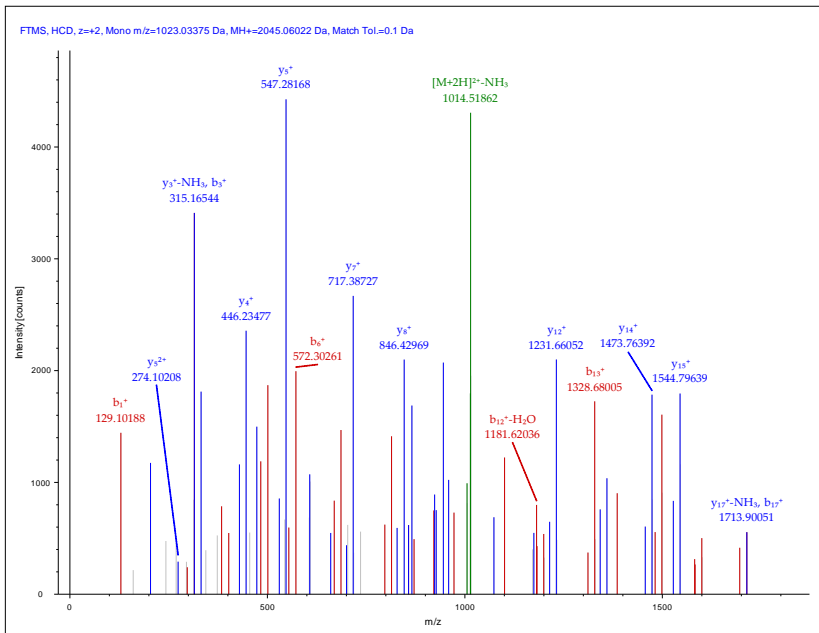

Experiment

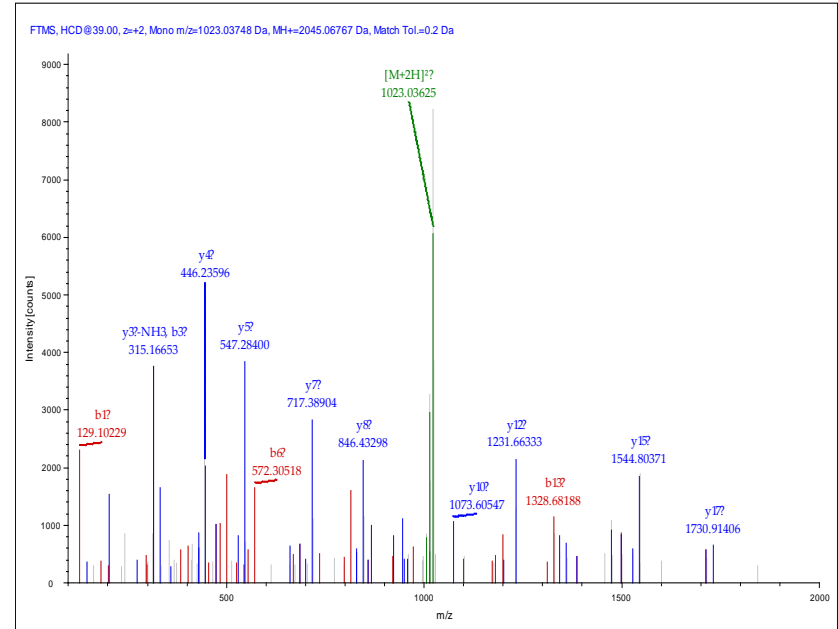

Validated

# GAPNPAVVTPSPK

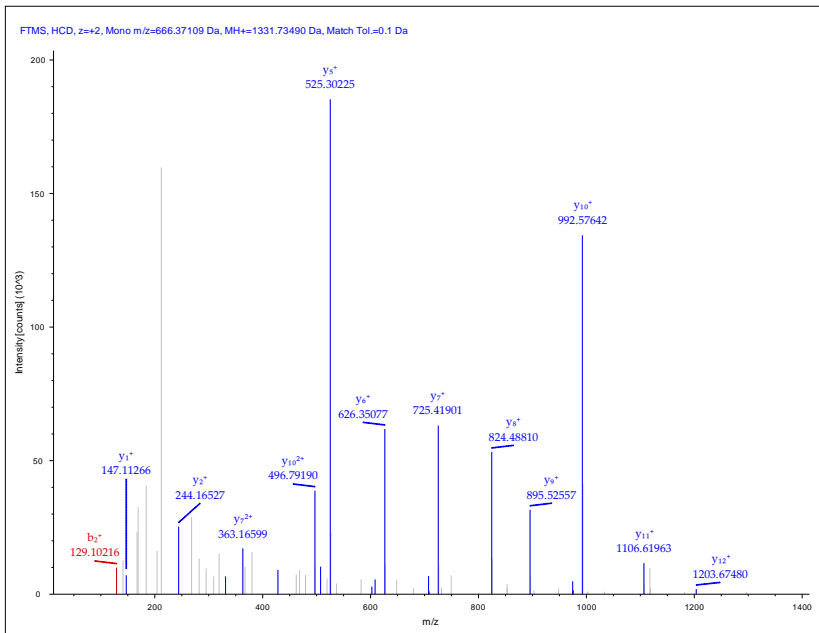

Experiment

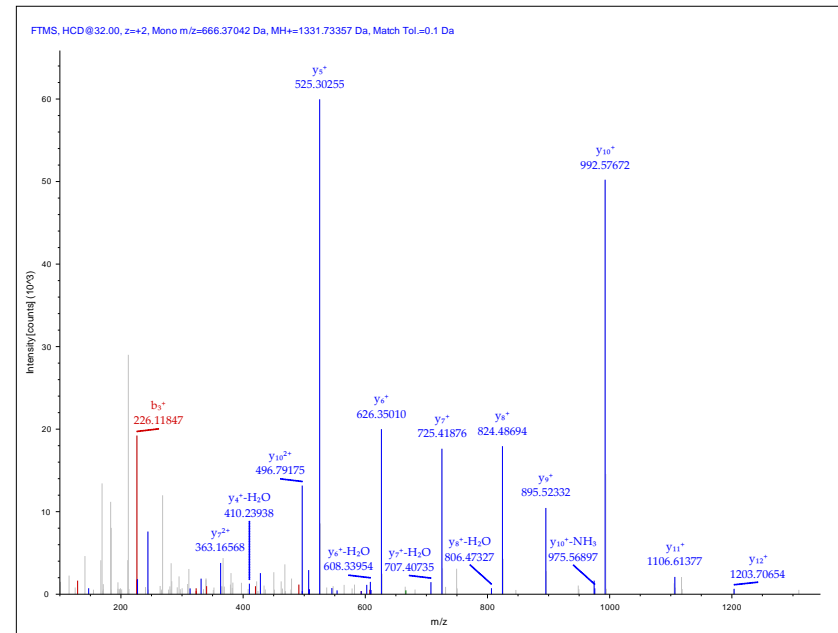

Validated



# CEFQEAYVLLSEKK

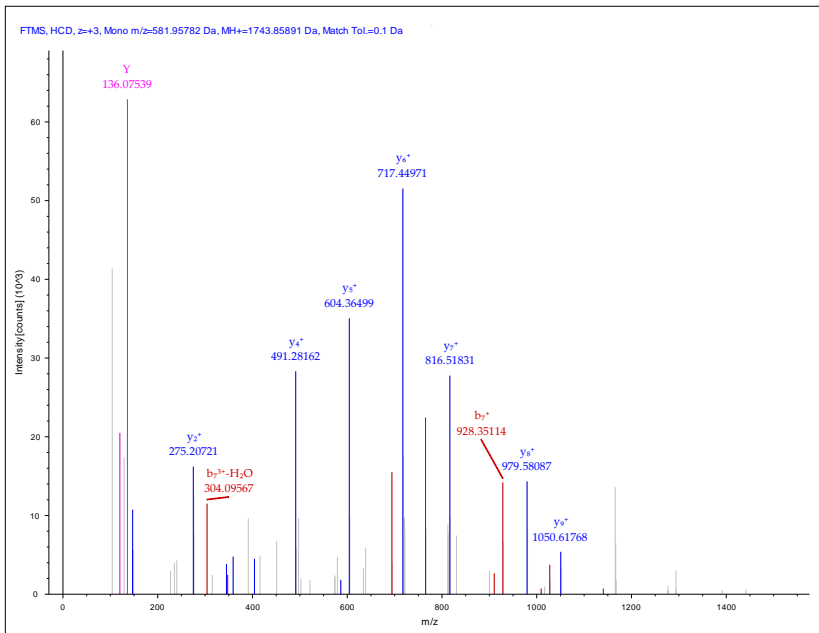

Experiment

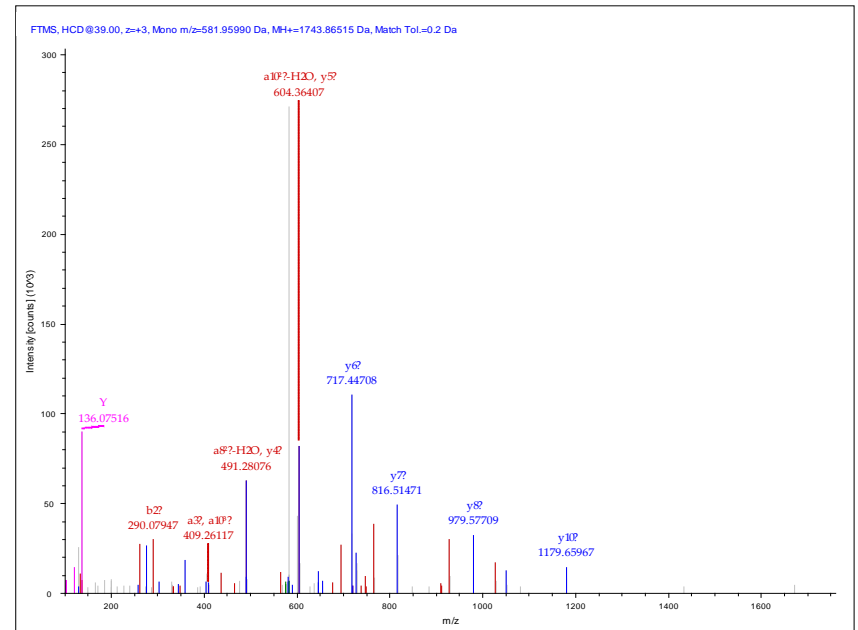

Validated

# QALEKFEDSK

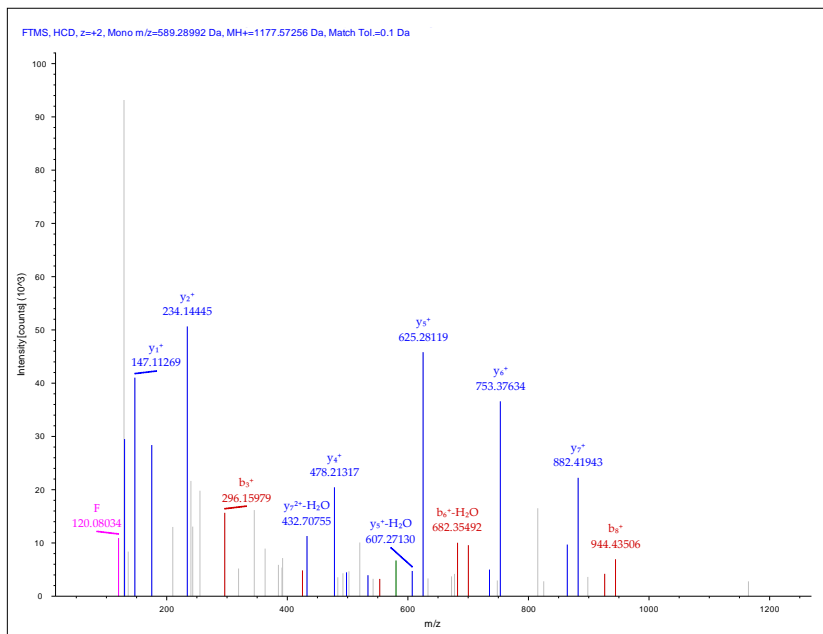

Experiment

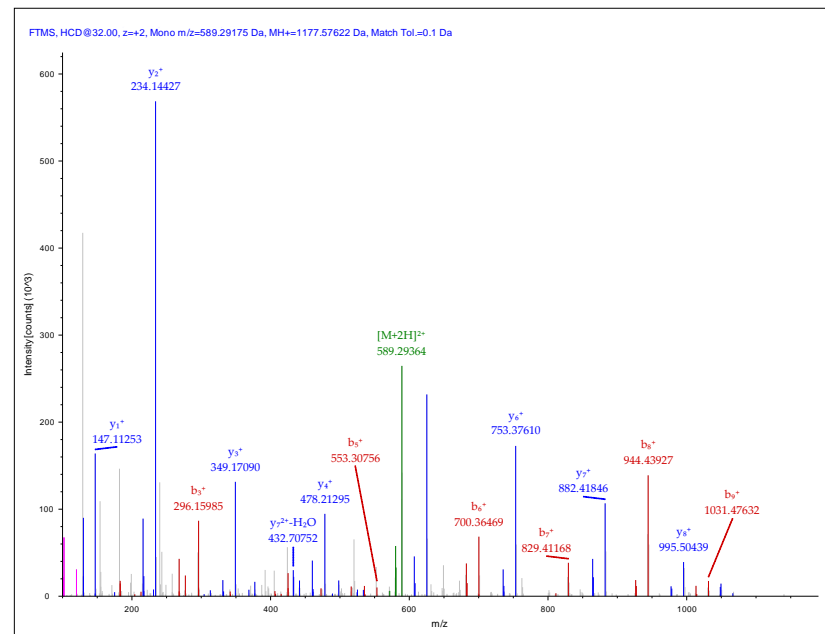

Validated
